# Supplementary material for: Mycobacterium vaccae NCTC 11659, a Soil-Derived Bacterium with Stress Resilience Properties, Modulates the Proinflammatory Effects of LPS in Macrophages
Source: MDPI journal article supplement (doi:10.3390/ijms24065176), 2023-03-08
Supplement: s1 [file s1]

*S1. List of abbreviations for all gene symbols*

*AGER*, advanced glycosylation end-product specific receptor

*ALOX5*, arachidonate 5-lipoxygenase

*AREG*, amphiregulin

*ATF2*, activating transcription factor 2

*BCL2L1*, BCL2 like 1

*BCL6*, BCL6 transcription repressor

*BIRC2*, baculoviral IAP repeat containing 2

*C1QA*, complement C1q A chain

*C1QB*, complement C1q B chain

*C1S*, complement C1s

*C2*, complement C2

*C3*, complement C3

*C3AR1*, complement C3a receptor 1

*C4A*, complement C4A (Rodgers blood group)

*C5*, complement C5

*CCL13*, C-C motif chemokine ligand 13

*CCL17*, C-C motif chemokine ligand 17

*CCL19*, C-C motif chemokine ligand 19

*CCL2*, C-C motif chemokine ligand 2

*CCL20*, C-C motif chemokine ligand 20

*CCL21*, C-C motif chemokine ligand 21

*CCL22*, C-C motif chemokine ligand 22

*CCL23*, C-C motif chemokine ligand 23

*CCL24*, C-C motif chemokine ligand 24

*CCL3*, C-C motif chemokine ligand 3

*CCL4*, C-C motif chemokine ligand 4

*CCL5*, C-C motif chemokine ligand 5

*CCL8*, C-C motif chemokine ligand 8

*CCR1*, C-C motif chemokine receptor 1

*CCR2*, C-C motif chemokine receptor 2

*CCR7*, C-C motif chemokine receptor 7

*CD163*, CD163 molecule

*CD4*, CD4 molecule

*CD40*, CD40 molecule

*CD86*, CD86 molecule

*CEBPB*, CCAAT enhancer binding protein beta

*CFB*, complement factor B

*CFD*, complement factor D

*CFL1*, cofilin 1

*CREB1*, cAMP responsive element binding protein 1

*CSF1*, colony stimulating factor 1

*CSF3*, colony stimulating factor 3

*CXCL1*, C-X-C motif chemokine ligand 1

*CXCL10*, C-X-C motif chemokine ligand 10

*CXCL2*, C-X-C motif chemokine ligand 2  
*CXCL3*, C-X-C motif chemokine ligand 3  
*CXCL5*, C-X-C motif chemokine ligand 5  
*CXCL6*, C-X-C motif chemokine ligand 6  
*CXCR2*, C-X-C motif chemokine receptor 2  
*CXCR4*, C-X-C motif chemokine receptor 4  
*CYSLTR1*, cysteinyl leukotriene receptor 1  
*DAXX*, death domain associated protein  
*DDIT3*, DNA damage inducible transcript 3  
*DEFA1*, defensin alpha 1  
*ELK1*, ETS transcription factor ELK1  
*FOS*, Fos proto-oncogene, AP-1 transcription factor subunit  
*FXRD2*, FXRD domain containing ion transport regulator 2  
*GNAQ*, G protein subunit alpha q  
*GNAS*, GNAS complex locus  
*GRB2*, growth factor receptor bound protein 2  
*HDAC4*, histone deacetylase 4  
*HIF1A*, hypoxia inducible factor 1 subunit alpha  
*HLA-DRA*, major histocompatibility complex, class II, DR alpha  
*HLA-DRB1*, major histocompatibility complex, class II, DR beta 1  
*HMGB1*, high mobility group box 1  
*HMGB2*, high mobility group box 2  
*HMGNI*, high mobility group nucleosome binding domain 1  
*HRAS*, HRas proto-oncogene, GTPase  
*HSPB1*, heat shock protein family B (small) member 1  
*IFI44*, interferon induced protein 44  
*IFIT1*, interferon induced protein with tetratricopeptide repeats 1  
*IFIT2*, interferon induced protein with tetratricopeptide repeats 2  
*IFIT3*, interferon induced protein with tetratricopeptide repeats 3  
*IL10*, interleukin 10  
*IL10RB*, interleukin 10 receptor subunit beta  
*IL11*, interleukin 11  
*IL12B*, interleukin 12B  
*IL15*, interleukin 15  
*IL18*, interleukin 18  
*IL1A*, interleukin 1 alpha  
*IL1B*, interleukin 1 beta  
*IL1R1*, interleukin 1 receptor type 1  
*IL1RAP*, interleukin 1 receptor accessory protein  
*IL1RN*, interleukin 1 receptor antagonist  
*IL23A*, interleukin 23 subunit alpha  
*IL23R*, interleukin 23 receptor  
*IL6R*, interleukin 6 receptor  
*IL8*, C-X-C motif chemokine ligand 8  
*IRF1*, interferon regulatory factor 1  
*IRF3*, interferon regulatory factor 3

*IRF5*, interferon regulatory factor 5  
*IRF7*, interferon regulatory factor 7  
*ITGB2*, integrin subunit beta 2  
*KEAP1*, kelch like ECH associated protein 1  
*LIMK1*, LIM domain kinase 1  
*LTB*, lymphotoxin beta  
*LTB4R*, leukotriene B4 receptor  
*LTB4R2*, leukotriene B4 receptor 2  
*LY96*, lymphocyte antigen 96  
*MAFF*, MAF bZIP transcription factor F  
*MAFG*, MAF bZIP transcription factor G  
*MAFK*, MAF bZIP transcription factor K  
*MAP2K1*, mitogen-activated protein kinase kinase 1  
*MAP2K4*, mitogen-activated protein kinase kinase 4  
*MAP2K6*, mitogen-activated protein kinase kinase 6  
*MAP3K1*, mitogen-activated protein kinase kinase kinase 1  
*MAP3K5*, mitogen-activated protein kinase kinase kinase 5  
*MAP3K7*, mitogen-activated protein kinase kinase kinase 7  
*MAPK1*, mitogen-activated protein kinase 1  
*MAPK14*, mitogen-activated protein kinase 14  
*MAPK3*, mitogen-activated protein kinase 3  
*MAPK8*, mitogen-activated protein kinase 8  
*MAPKAPK2*, MAPK activated protein kinase 2  
*MAPKAPK5*, MAPK activated protein kinase 5  
*MAX*, MYC associated factor X  
*MEF2C*, myocyte enhancer factor 2C  
*MEF2D*, myocyte enhancer factor 2D  
*MKNK1*, MAPK interacting serine/threonine kinase 1  
*MMP9*, matrix metalloproteinase 9  
*MRC1*, mannose receptor C-type 1  
*MX1*, MX dynamin like GTPase 1  
*MX2*, MX dynamin like GTPase 2  
*MYC*, MYC proto-oncogene, bHLH transcription factor  
*MYD88*, MYD88 innate immune signal transduction adaptor  
*NFATC3*, nuclear factor of activated T cells 3  
*NFE2L2*, nuclear factor, erythroid 2 like 2  
*NFKB1*, nuclear factor kappa B subunit 1  
*NLRP3*, NLR family pyrin domain containing 3  
*NOD1*, nucleotide binding oligomerization domain containing 1  
*NOD2*, nucleotide binding oligomerization domain containing 2  
*NR3C1*, nuclear receptor subfamily 3 group C member 1  
*OAS2*, 2'-5'-oligoadenylate synthetase 2  
*OASL*, 2'-5'-oligoadenylate synthetase like  
*OXER1*, oxoeicosanoid receptor 1  
*PDGFA*, platelet derived growth factor subunit A  
*PLA2G4A*, phospholipase A2 group IVA

*PLCB1*, phospholipase C beta 1  
*PPP1R12B*, protein phosphatase 1 regulatory subunit 12B  
*PRKCA*, protein kinase C alpha  
*PRKCB*, protein kinase C beta  
*PTGER2*, prostaglandin E receptor 2  
*PTGER4*, prostaglandin E receptor 4  
*PTGIR*, prostaglandin I2 receptor  
*PTGS1*, prostaglandin-endoperoxide synthase 1  
*PTGS2*, prostaglandin-endoperoxide synthase 2  
*PTK2*, protein tyrosine kinase 2  
*RAC1*, Rac family small GTPase 1  
*RAF1*, Raf-1 proto-oncogene, serine/threonine kinase  
*RAPGEF2*, Rap guanine nucleotide exchange factor 2  
*RELA*, RELA proto-oncogene, NF-kB subunit  
*RELB*, RELB proto-oncogene, NF-kB subunit  
*RHOA*, ras homolog family member A  
*RIPK1*, receptor interacting serine/threonine kinase 1  
*RIPK2*, receptor interacting serine/threonine kinase 2  
*ROCK2*, Rho associated coiled-coil containing protein kinase 2  
*RPS6KA5*, ribosomal protein S6 kinase A5  
*SHC1*, SHC adaptor protein 1  
*SMAD7*, SMAD family member 7  
*STAT1*, signal transducer and activator of transcription 1  
*STAT2*, signal transducer and activator of transcription 2  
*STAT3*, signal transducer and activator of transcription 3  
*TCF4*, transcription factor 4  
*TGFB1*, transforming growth factor beta 1  
*TGFB2*, transforming growth factor beta 2  
*TGFBR1*, transforming growth factor beta receptor 1  
*TLR1*, toll like receptor 1  
*TLR2*, toll like receptor 2  
*TLR4*, toll like receptor 4  
*TLR5*, toll like receptor 5  
*TLR6*, toll like receptor 6  
*TLR7*, toll like receptor 7  
*TLR8*, toll like receptor 8  
*TNF*, tumor necrosis factor  
*TNFAIP3*, TNF alpha induced protein 3  
*TNFSF14*, TNF superfamily member 14  
*TOLLIP*, toll interacting protein  
*TRADD*, TNFRSF1A associated via death domain  
*TRAF2*, TNF receptor associated factor 2  
*TREM2*, triggering receptor expressed on myeloid cells 2  
*TWIST2*, twist family bHLH transcription factor 2  
*TYROBP*, transmembrane immune signaling adaptor TYROBP

## S2. Supplemental results

### S2.1. Cell viability

Analysis revealed no main effect of either *M. vaccae* NCTC 11659 ( $F_{(4, 30)} = 0.8854$ ,  $p = 0.4845$ ) or LPS ( $F_{(1, 30)} = 0.4101$ ,  $p = 0.5268$ ), nor was there an interaction effect ( $F_{(4, 30)} = 0.2806$ ,  $p = 0.8882$ ; Fig. S1).

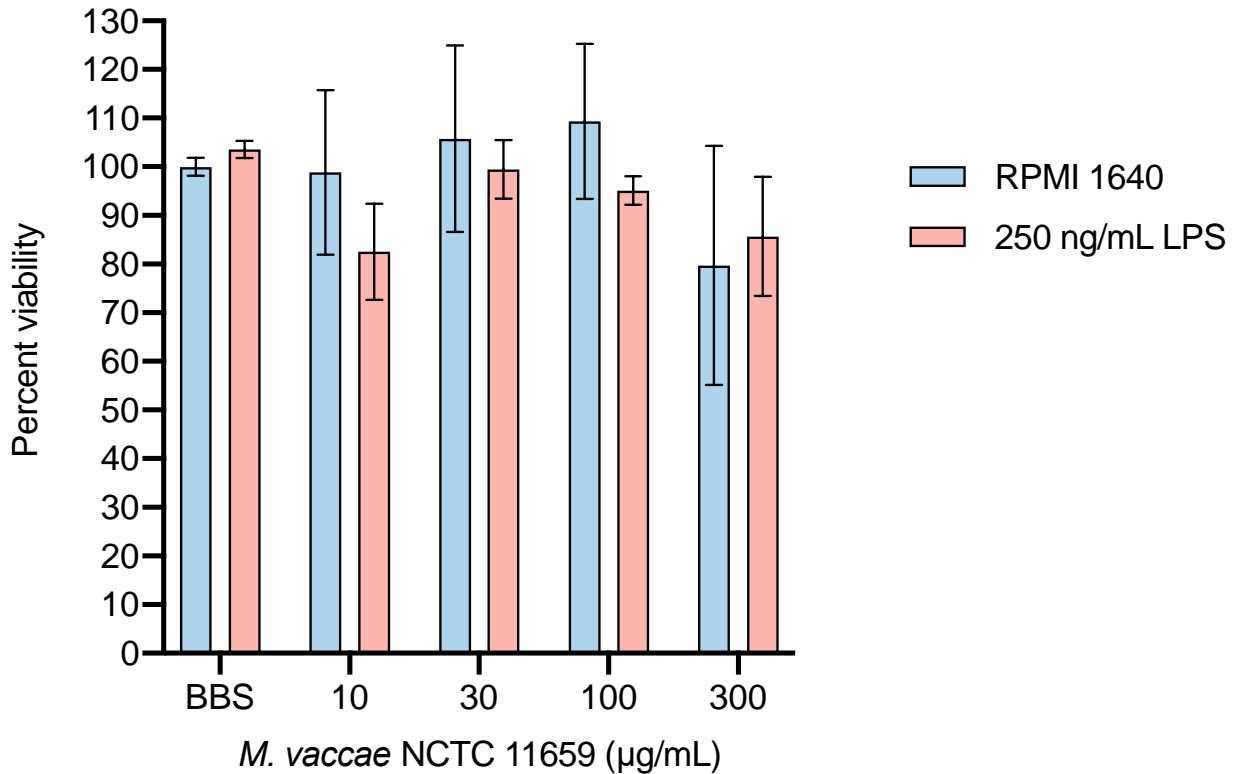

**Figure S1.** Treating THP-1-derived macrophages with *M. vaccae* NCTC 11659 (0, 10, 30, 100, or 300 µg/mL; 48 h) and lipopolysaccharide (0, 250 ng/mL; 24 h) did not change cell viability. Data are expressed as percent viable cells relative to the BBS/RPMI 1640 condition. Cell viability was assessed by flow cytometry gating of live singlets based on forward and side scatter (FSC/SSC). Sample sizes can be found in Table S1. Abbreviations: BBS, borate-buffered saline; LPS, lipopolysaccharide.

### S2.2. Analysis of NanoString housekeeping genes

#### S2.2.1. CTLC

Analysis revealed an *M. vaccae* NCTC 11659 x LPS interaction ( $F_{(2, 29)} = 5.464$ ,  $p = 0.0097$ ). Dunnett's multiple comparisons test revealed significant differences between BBS/RPMI 1640 vs. 300 µg/mL *M. vaccae* NCTC 11659/RPMI 1640 ( $p = 0.0018$ ), BBS/RPMI 1640 vs. BBS/250 ng/mL LPS ( $p < 0.0001$ ), 30 µg/mL *M. vaccae* NCTC 11659/RPMI 1640 vs. 30 µg/mL *M. vaccae* NCTC 11659/250 ng/mL LPS ( $p < 0.0001$ ), and 300 µg/mL *M. vaccae* NCTC

11659/RPMI 1640 vs. 300 µg/mL *M. vaccae* NCTC 11659/250 ng/mL LPS ( $p = 0.0042$ ). Fig. S2.

#### S2.2.2. *GAPDH*

Analysis revealed an *M. vaccae* NCTC 11659 x LPS interaction ( $F_{(2, 29)} = 21.84$ ,  $p < 0.0001$ ). Dunnett's multiple comparisons test revealed significant differences between BBS/RPMI 1640 vs. BBS/250 ng/mL LPS ( $p < 0.0001$ ), BBS/250 ng/mL LPS vs. 30 µg/mL *M. vaccae* NCTC 11659 ( $p < 0.0001$ ), and BBS/250 ng/mL LPS vs. 300 µg/mL *M. vaccae* NCTC 11659 ( $p < 0.0001$ ; Fig. S2).

#### S2.2.3. *GUSB*

Analysis revealed an *M. vaccae* NCTC 11659 main effect ( $F_{(2, 29)} = 15.31$ ,  $p < 0.0001$ ), but no main effect of LPS nor an interaction effect. Dunnett's multiple comparisons test revealed significant differences between BBS/RPMI 1640 vs. 300 µg/mL *M. vaccae* NCTC 11659/RPMI 1640 ( $p = 0.0111$ ) and BBS/250 ng/mL LPS vs. 300 µg/mL *M. vaccae* NCTC 11659/250 ng/mL LPS ( $p = 0.0035$ ; Fig. S2).

#### S2.2.4. *HPRT1*

Analysis revealed an LPS main effect ( $F_{(1, 29)} = 36.53$ ,  $p < 0.0001$ ), but no main effect of *M. vaccae* NCTC 11659 nor an interaction effect. Dunnett's multiple comparisons test revealed significant differences between 30 µg/mL *M. vaccae* NCTC 11659/RPMI 1640 vs. 30 µg/mL *M. vaccae* NCTC 11659/250 ng/mL LPS ( $p = 0.0138$ ) and 300 µg/mL *M. vaccae* NCTC 11659/RPMI 1640 vs. 300 µg/mL *M. vaccae* NCTC 11659/250 ng/mL LPS ( $p = 0.0010$ ; Fig. S2).

#### S2.2.5. *PGK1*

Analysis revealed an *M. vaccae* NCTC 11659 main effect ( $F_{(2, 29)} = 38.89$ ,  $p < 0.0001$ ), but no main effect of LPS nor an interaction effect. Dunnett's multiple comparisons test revealed significant differences between BBS/RPMI 1640 vs. 30 µg/mL *M. vaccae* NCTC 11659/RPMI 1640 ( $p < 0.0001$ ), BBS/RPMI 1640 vs. 300 µg/mL *M. vaccae* NCTC 11659/RPMI 1640 ( $p < 0.0001$ ), BBS/250 ng/mL LPS vs. 30 µg/mL *M. vaccae* NCTC 11659/250 ng/mL LPS ( $p = 0.0027$ ), and BBS/250 ng/mL LPS vs. 300 µg/mL *M. vaccae* NCTC 11659/250 ng/mL LPS ( $p = 0.0002$ ; Fig. S2).

#### S2.2.6. *TUBB*

Analysis revealed an *M. vaccae* NCTC 11659 x LPS interaction ( $F_{(2, 29)} = 4.294$ ,  $p < 0.0233$ ). Dunnett's multiple comparisons test revealed significant differences between BBS/RPMI 1640 vs. BBS/250 ng/mL LPS ( $p < 0.0001$ ), 30 µg/mL *M. vaccae* NCTC 11659/RPMI 1640 vs. 30 µg/mL *M. vaccae* NCTC 11659/250 ng/mL LPS ( $p < 0.0001$ ), and 300 µg/mL *M. vaccae* NCTC 11659/RPMI 1640 vs. 300 µg/mL *M. vaccae* NCTC 11659/250 ng/mL LPS ( $p < 0.0001$ ; Fig. S2).

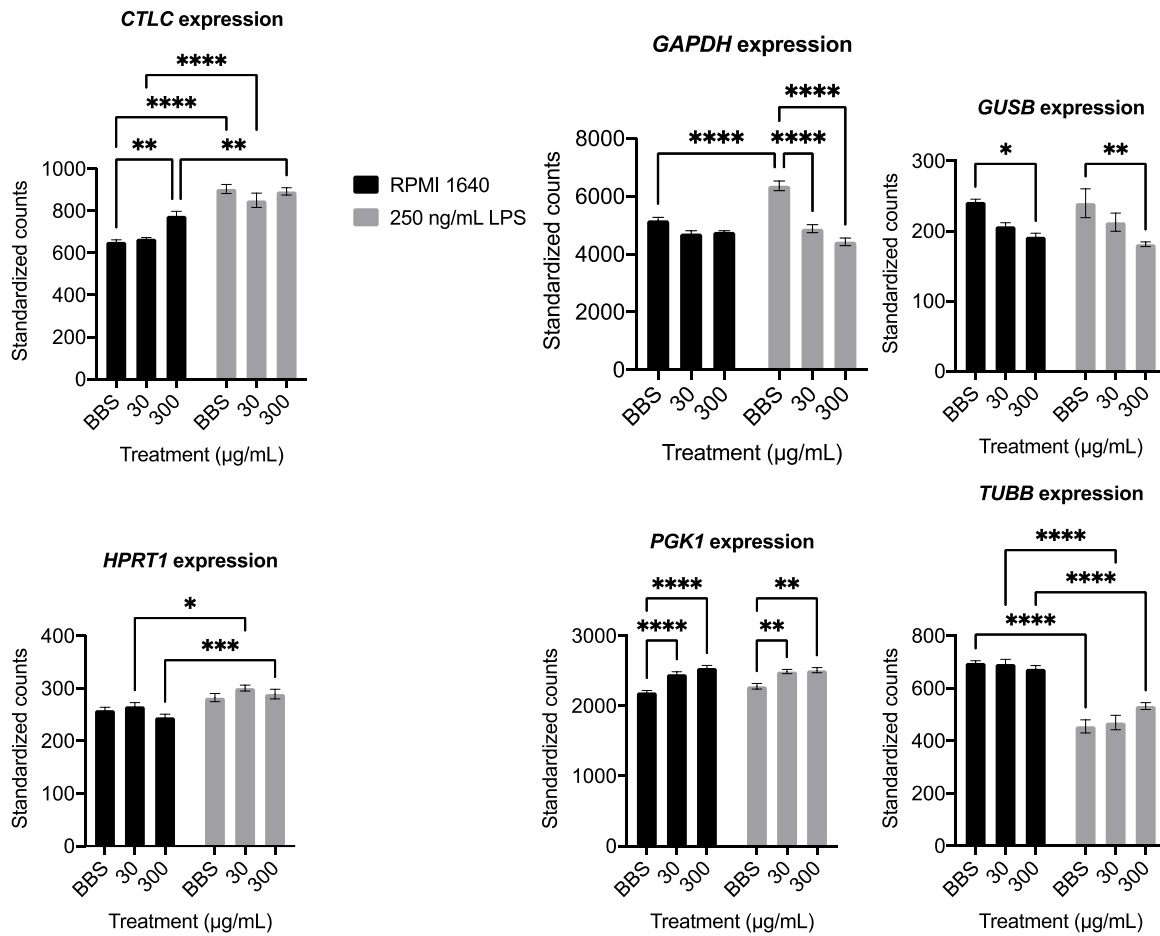

**Figure S2.** Treating human THP-1 monocyte-derived macrophages with *M. vaccae* NCTC 11659 (48 h) and lipopolysaccharide (LPS; 250 ng/mL, 24 h) resulted in differential expression of all internal housekeeping genes in *Experiment 1*. Abbreviations: BBS, borate-buffered saline; LPS, lipopolysaccharide.

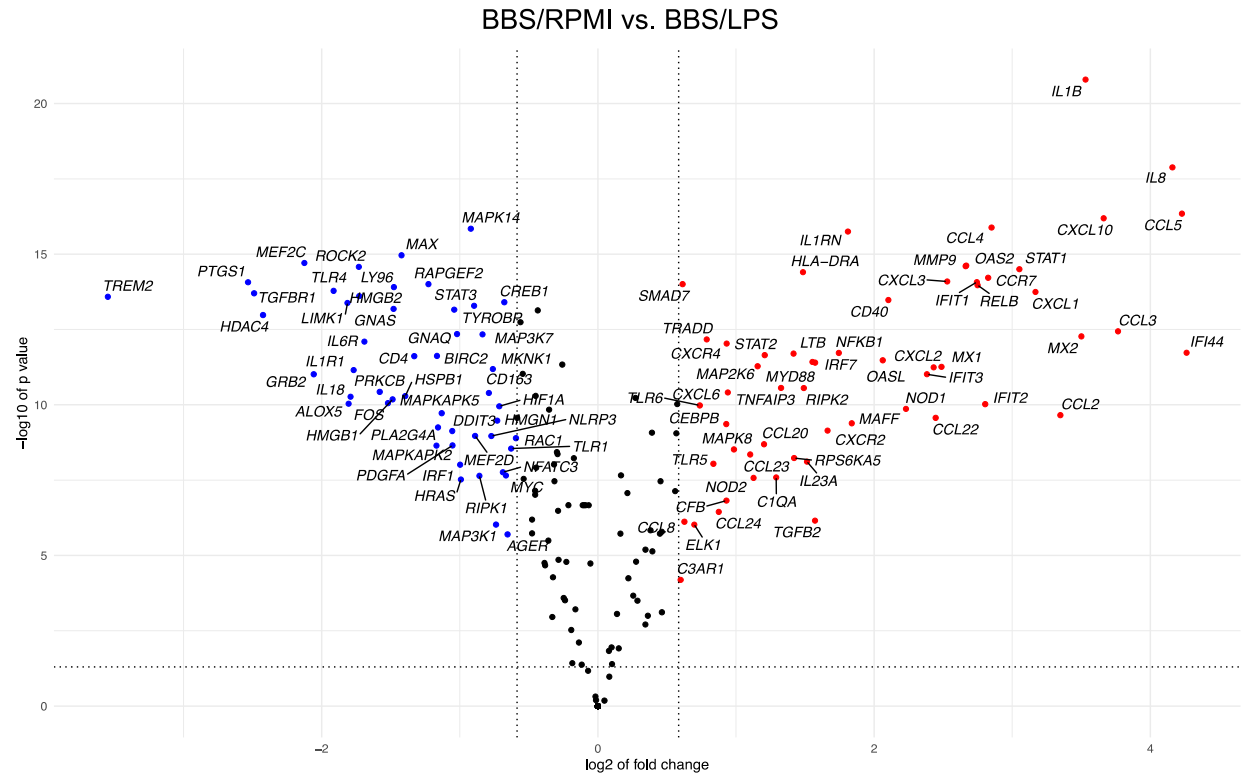

**Figure S3.** Volcano plot illustrating that lipopolysaccharide (LPS; 250 ng/mL, 24 h) induced an inflammatory gene expression phenotype in human THP-1 derived macrophages. The x axis is the log base 2 of the fold change and the y axis is the negative log base 10 of the  $p$ -value. Each dot in the figure represents a specific gene. The blue dots in the upper left quadrant of the volcano plot represent the genes that were expressed at lower levels in the BBS vehicle/250 ng/mL LPS group relative to the BBS vehicle/RPMI 1640 vehicle group. The red dots in the upper right quadrant of the volcano plot represent the genes in the BBS vehicle/250 ng/mL LPS group that were expressed at higher levels relative to the BBS vehicle/RPMI 1640 vehicle group. The black dots represent genes that were not differentially expressed between the groups (i.e., the absolute value of the log base 2 of fold change  $< 1.5$  or  $p$ -value  $> 0.05$ ). The dashed vertical lines represent log base 2 fold changes of approximately  $-0.6$  or  $0.6$  (i.e., genes with an absolute fold change of at least 1.5). The horizontal dashed line is the negative log base 10 of  $p$ -value alpha level of 0.05. The volcano plot was generated using the ggplot2 and ggrepel packages. See S1. List of abbreviations for all gene symbols for a complete list of definitions of gene symbols (S1, Supplementary Material online).



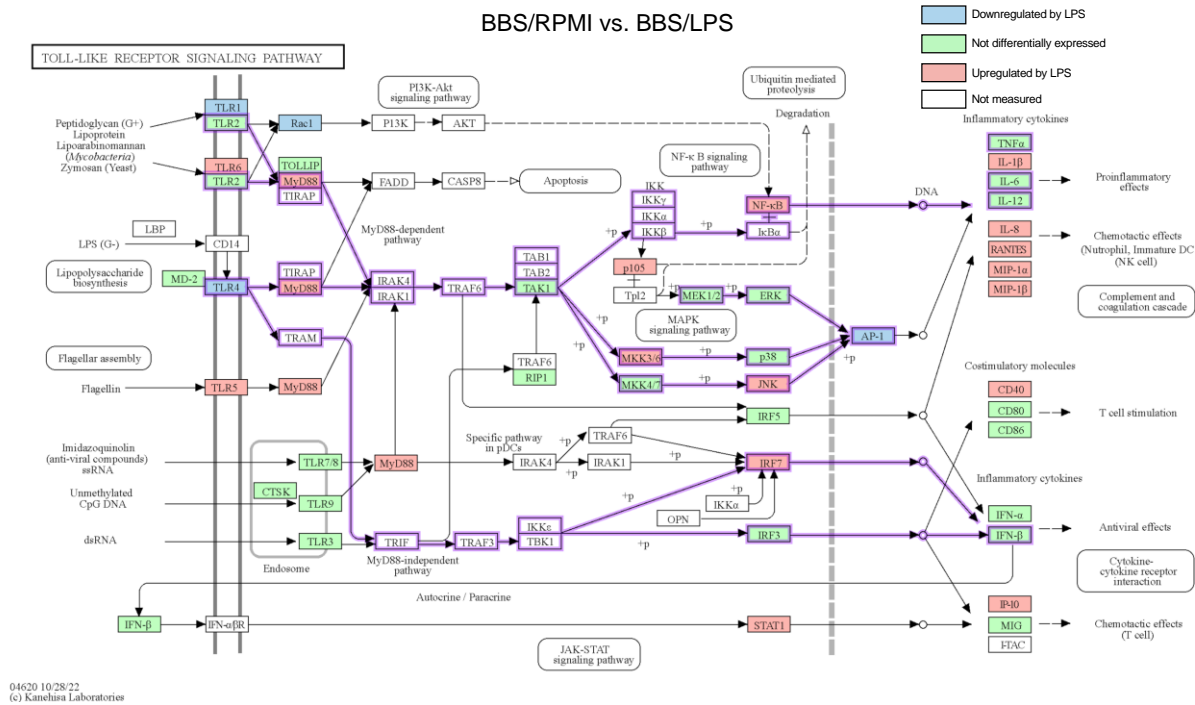

**Figure S4.** Toll-Like Receptor Signaling KEGG pathway color coded to reflect the effects of 250 ng/mL lipopolysaccharide (LPS). Purple lines indicate TLR2 and TLR4 signaling pathways. Genes highlighted in blue were downregulated by 250 ng/mL LPS, genes highlighted in green were not differentially expressed, genes highlighted in red were upregulated by 250 ng/mL LPS, and genes in white were not measured.

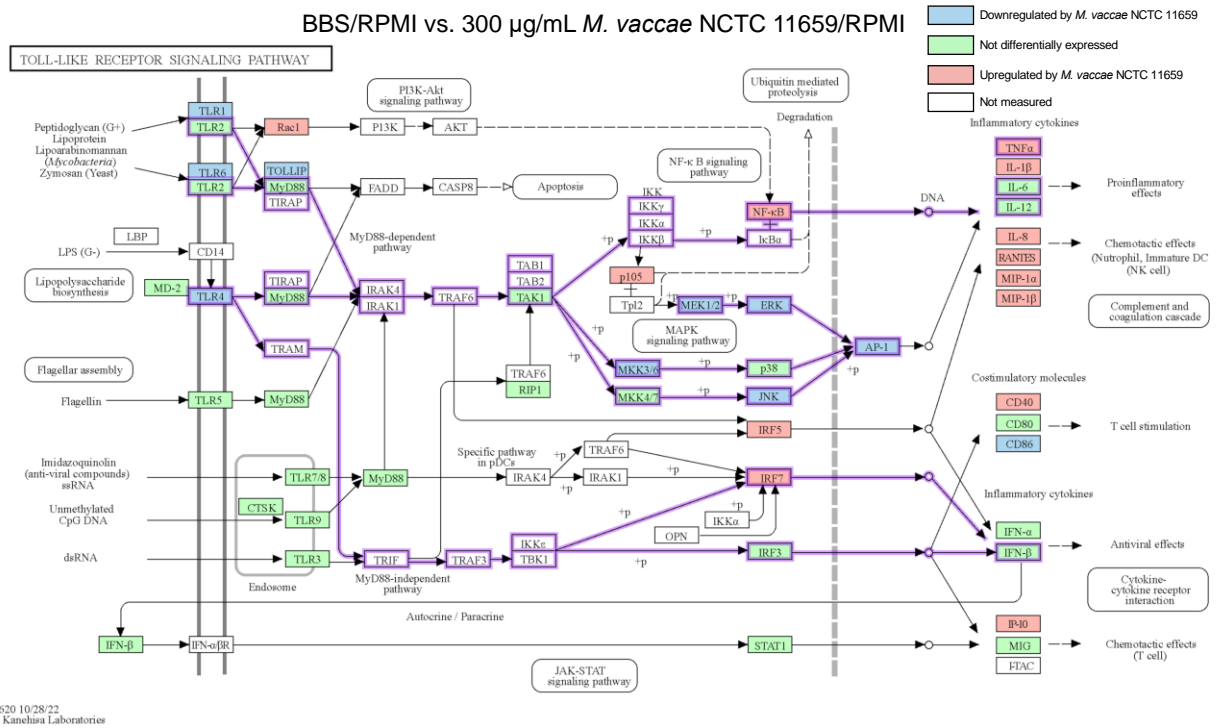

**Figure S5.** Toll-Like Receptor Signaling KEGG pathway color coded to reflect the effects of 300  $\mu$ g/mL *M. vaccae* NCTC 11659. Purple lines indicate TLR2 and TLR4 signaling pathways. Genes highlighted in blue were downregulated by 300  $\mu$ g/mL *M. vaccae* NCTC 11659, genes highlighted in green were not differentially expressed, genes highlighted in red were upregulated by 300  $\mu$ g/mL *M. vaccae* NCTC 11659, and genes in white were not measured.

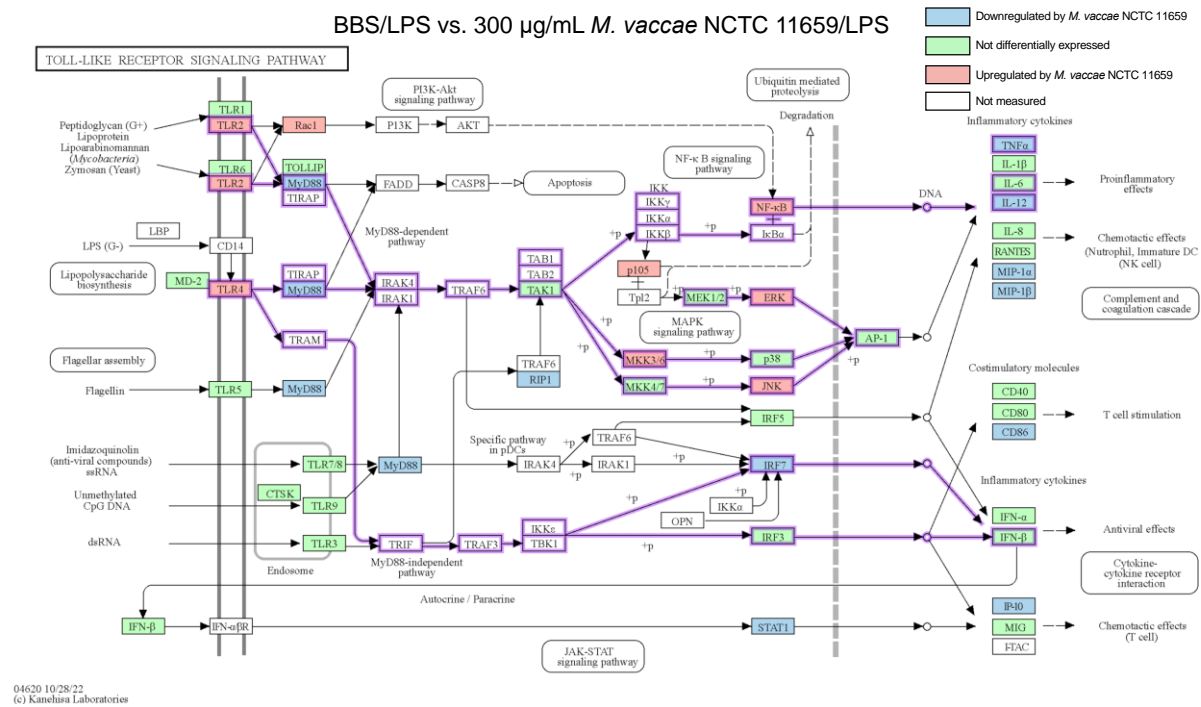

**Figure S6.** Toll-Like Receptor Signaling KEGG pathway color coded to reflect the effects of *M. vaccae* NCTC 11659 in the presence of 250 ng/mL lipopolysaccharide (LPS). Purple lines indicate TLR2 and TLR4 signaling pathways. Genes highlighted in blue were downregulated by 300  $\mu$ g/mL *M. vaccae* NCTC 11659, genes highlighted in green were not differentially expressed, genes highlighted in red were upregulated by 300  $\mu$ g/mL *M. vaccae* NCTC 11659, and genes in white were not measured.



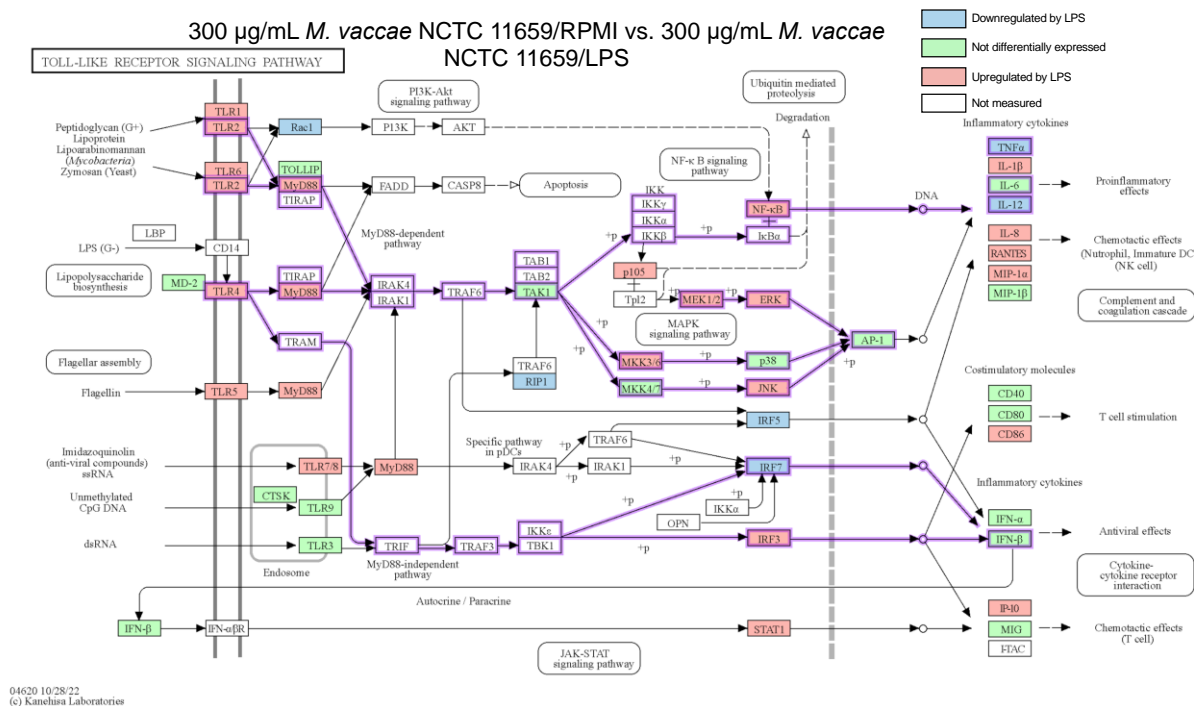

**Figure S8.** Toll-Like Receptor Signaling KEGG pathway color coded to reflect the effects of 250 ng/mL lipopolysaccharide (LPS) in the presence of 300  $\mu\text{g/mL}$  *M. vaccae* NCTC 11659. Purple lines indicate TLR2 and TLR4 signaling pathways. Genes highlighted in blue were downregulated by 250 ng/mL LPS, genes highlighted in green were not differentially expressed, genes highlighted in red were upregulated by 250 ng/mL LPS, and genes in white were not measured.

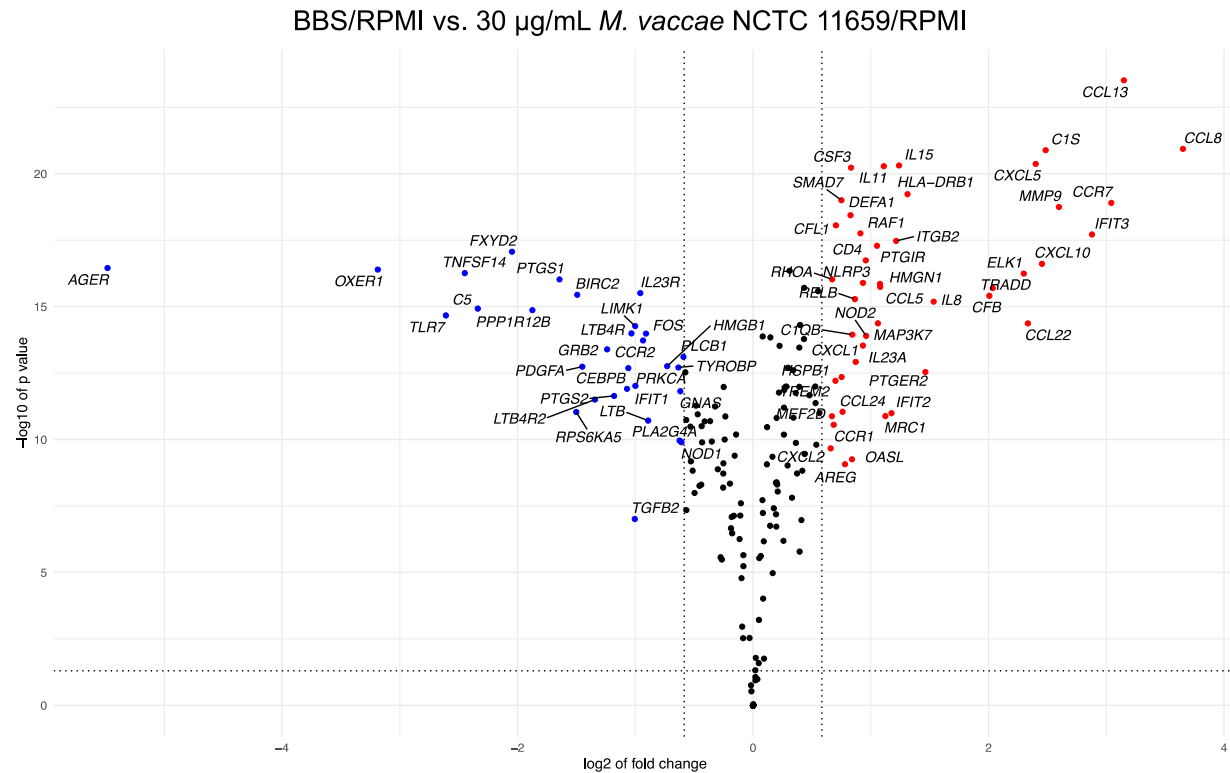

**Figure S9.** Volcano plot illustrating that, in the RPMI 1640 vehicle control condition, *M. vaccae* NCTC 11659 (30  $\mu$ g/mL) results in differential expression of both proinflammatory and anti-inflammatory markers in human THP-1-derived macrophages. The x axis is the log base 2 of the fold change and the y axis is the negative log base 10 of the *p*-value. Each dot in the figure represents a specific gene. The blue dots in the upper left quadrant of the volcano plot represent the genes that were expressed at lower levels in 30  $\mu$ g/mL *M. vaccae* NCTC 11659/RPMI 1640 vehicle group relative to the BBS vehicle/RPMI 1640 vehicle group. The red dots in the upper right quadrant of the volcano plot represent the genes in the 30  $\mu$ g/mL *M. vaccae* NCTC 11659/RPMI 1640 vehicle group that were expressed at higher levels relative to the BBS vehicle/RPMI 1640 vehicle group. The black dots represent genes that were not differentially expressed between the groups (i.e., the absolute value of the log base 2 of fold change  $< 1.5$  or *p*-value  $> 0.05$ ). The dashed vertical lines represent log base 2 fold changes of approximately  $-0.6$  or  $0.6$  (i.e., genes with a fold change of at least 1.5). The horizontal dashed line is the negative log base 10 of adjusted *p*-value alpha level of 0.05. The volcano plot was generated using the ggplot2 and ggrepel packages. See S1. List of abbreviations for all gene symbols for a complete list of definitions of gene symbols (S1, Supplementary Material online).

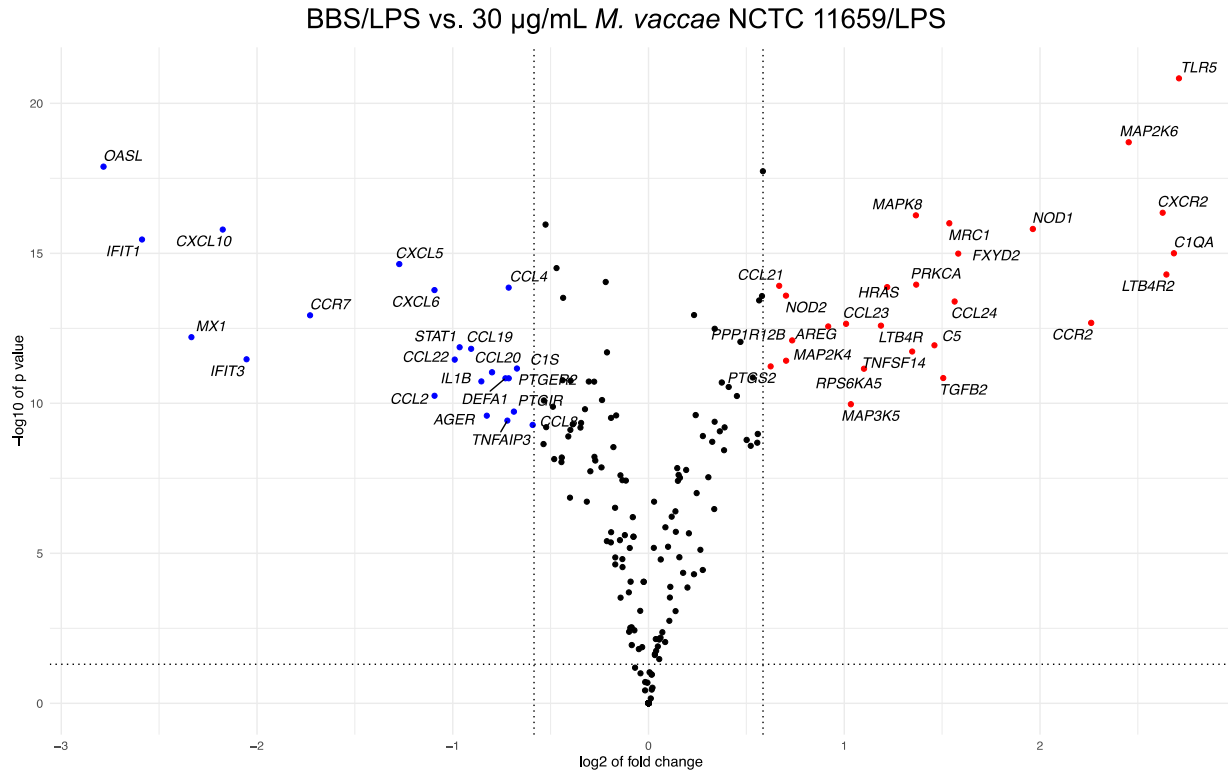

**Figure S10.** Volcano plot illustrating that, in the lipopolysaccharide (LPS; 250 ng/mL) challenge condition, *M. vaccae* NCTC 11659 (30  $\mu$ g/mL) shifted human THP-1-derived macrophages toward an anti-inflammatory phenotype, for example, with increased *TGFB2*, *MRC1* expression and decreased *IL1B* and *STAT1* expression when assessed 24 h after LPS challenge. The x axis is the log base 2 of the fold change and the y axis is the negative log base 10 of the *p*-value. Each dot in the figure represents a specific gene. The blue dots in the upper left quadrant of the volcano plot represent the genes that were expressed at lower levels in 30  $\mu$ g/mL *M. vaccae* NCTC 11659/250 ng/mL LPS group relative to BBS vehicle/250 ng/mL LPS group. The red dots in the upper right quadrant of the volcano plot represent the genes in 30  $\mu$ g/mL *M. vaccae* NCTC 11659/250 ng/mL LPS group that were expressed at higher levels relative to the BBS vehicle/250 ng/mL LPS group. The black dots represent genes that were not differentially expressed between the groups (i.e., the absolute value of the log base 2 of fold change < 1.5 or adjusted *p*-value > 0.05). The dashed vertical lines represent log base 2 fold changes of approximately  $-0.6$  or  $0.6$  (i.e., genes with a fold change of at least 1.5). The horizontal dashed line is the negative log base 10 of *p*-value alpha level of 0.05. The volcano plot was generated using the ggplot2 and ggrepel packages. See S1. *List of abbreviations for all gene symbols* for a complete list of definitions of gene symbols (S1, Supplementary Material online).

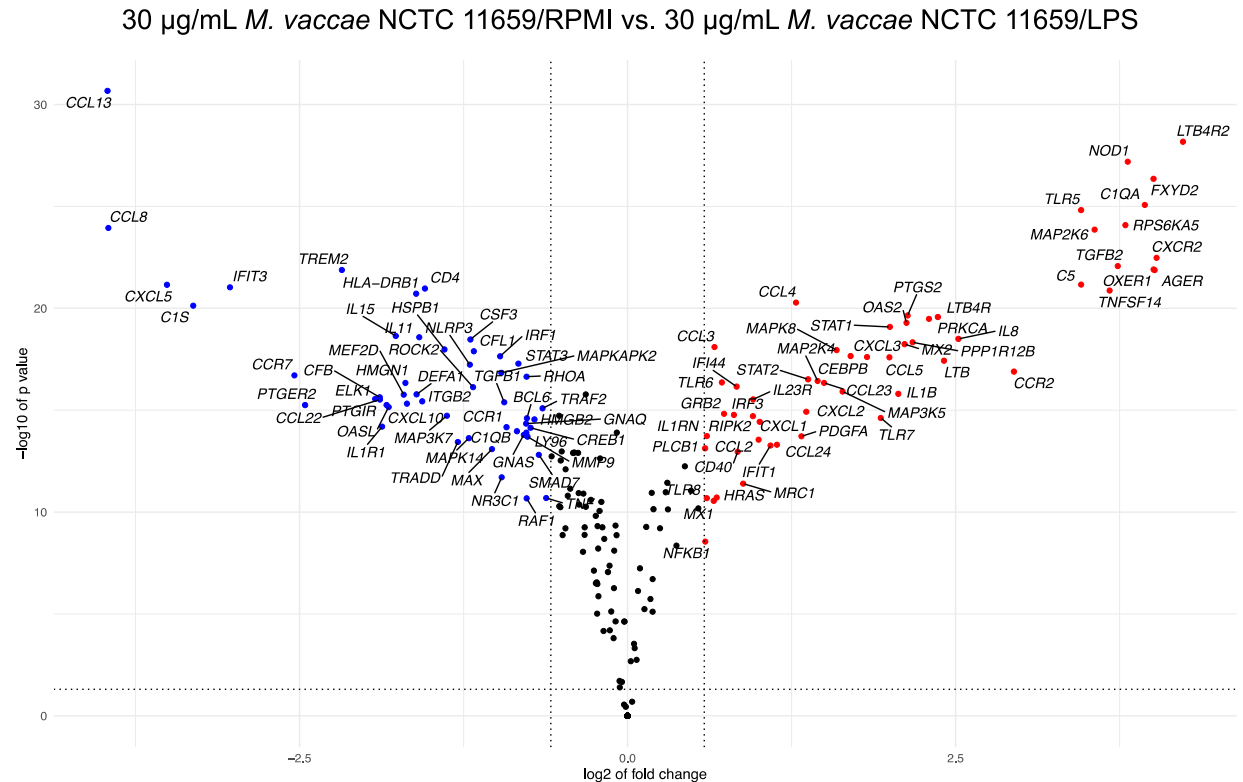

**Figure S11.** Volcano plot illustrating that, under the *M. vaccae* NCTC 11659 (30  $\mu\text{g/mL}$ ) treatment condition, lipopolysaccharide (LPS; 250 ng/mL) downregulated a number of genes involved in the LPS-induced  $\text{NF}\kappa\text{B}$  signaling cascade in THP-1-derived macrophages, including *LY96*, *MAP3K7*, *MAPK14*, *TNF*, and downregulated genes associated with LPS induction of *NLRP3*, a key component of the *NLRP3* inflammasome. The x axis is the log base 2 of the fold change and the y axis is the negative log base 10 of the *p*-value. Each dot in the figure represents a specific gene. The blue dots in the upper left quadrant of the volcano plot represent the genes that were expressed at lower levels in 30  $\mu\text{g/mL}$  *M. vaccae* NCTC 11659/250 ng/mL LPS group relative to *M. vaccae* NCTC 11659/RPMI 1640 vehicle control group. The red dots in the upper right quadrant of the volcano plot represent the genes in the 30  $\mu\text{g/mL}$  *M. vaccae* NCTC 11659/250 ng/mL LPS group that were expressed at higher levels relative to the 30  $\mu\text{g/mL}$  *M. vaccae* NCTC 11659/RPMI 1640 vehicle control group. The black dots represent genes that were not differentially expressed between the groups (i.e., the absolute value of the log base 2 of fold change < 1.5 or adjusted *p*-value > 0.05). The dashed vertical lines represent log base 2 fold changes of approximately  $-0.6$  or  $0.6$  (i.e., genes with a fold change of at least 1.5). The horizontal dashed line is the negative log base 10 of *p*-value alpha level of 0.05. The volcano plot was generated using the ggplot2 and ggrepel packages. See S1. List of abbreviations for all gene symbols for a complete list of definitions of gene symbols (S1, Supplementary Material online).

### S2.3. Analysis of *ACTB* housekeeping gene for real time RT-PCR

Analysis revealed a main effect of *M. vaccae* NCTC 11659 ( $F_{(4, 134)} = 4.556$ ,  $p = 0.0018$ ) and LPS ( $F_{(3, 134)} = 42.75$ ,  $p < 0.0001$ ). Dunnett's multiple comparisons test revealed significant differences between BBS/RPMI 1640 and BBS/0.5 ng/mL LPS ( $p = 0.0038$ ), 10  $\mu\text{g/mL}$  *M. vaccae* NCTC 11659/RPMI 1640 and 10  $\mu\text{g/mL}$  *M. vaccae* NCTC 11659/0.5 ng/mL LPS ( $p <$



0.0001), 10  $\mu\text{g/mL}$  *M. vaccae* NCTC 11659/RPMI 1640 and 10  $\mu\text{g/mL}$  *M. vaccae* NCTC 11659/2.5 ng/mL LPS ( $p < 0.0001$ ), 10  $\mu\text{g/mL}$  *M. vaccae* NCTC 11659/RPMI 1640 and 10  $\mu\text{g/mL}$  *M. vaccae* NCTC 11659/250 ng/mL LPS ( $p = 0.0036$ ), 30  $\mu\text{g/mL}$  *M. vaccae* NCTC 11659/RPMI 1640 and 30  $\mu\text{g/mL}$  *M. vaccae* NCTC 11659/0.5 ng/mL LPS ( $p = 0.0002$ ), 300  $\mu\text{g/mL}$  *M. vaccae* NCTC 11659/RPMI 1640 and 300  $\mu\text{g/mL}$  *M. vaccae* NCTC 11659/0.5 ng/mL LPS ( $p < 0.0001$ ), and 300  $\mu\text{g/mL}$  *M. vaccae* NCTC 11659/RPMI 1640 and 300  $\mu\text{g/mL}$  *M. vaccae* NCTC 11659/2.5 ng/mL LPS ( $p = 0.0095$ ; Fig. S12).

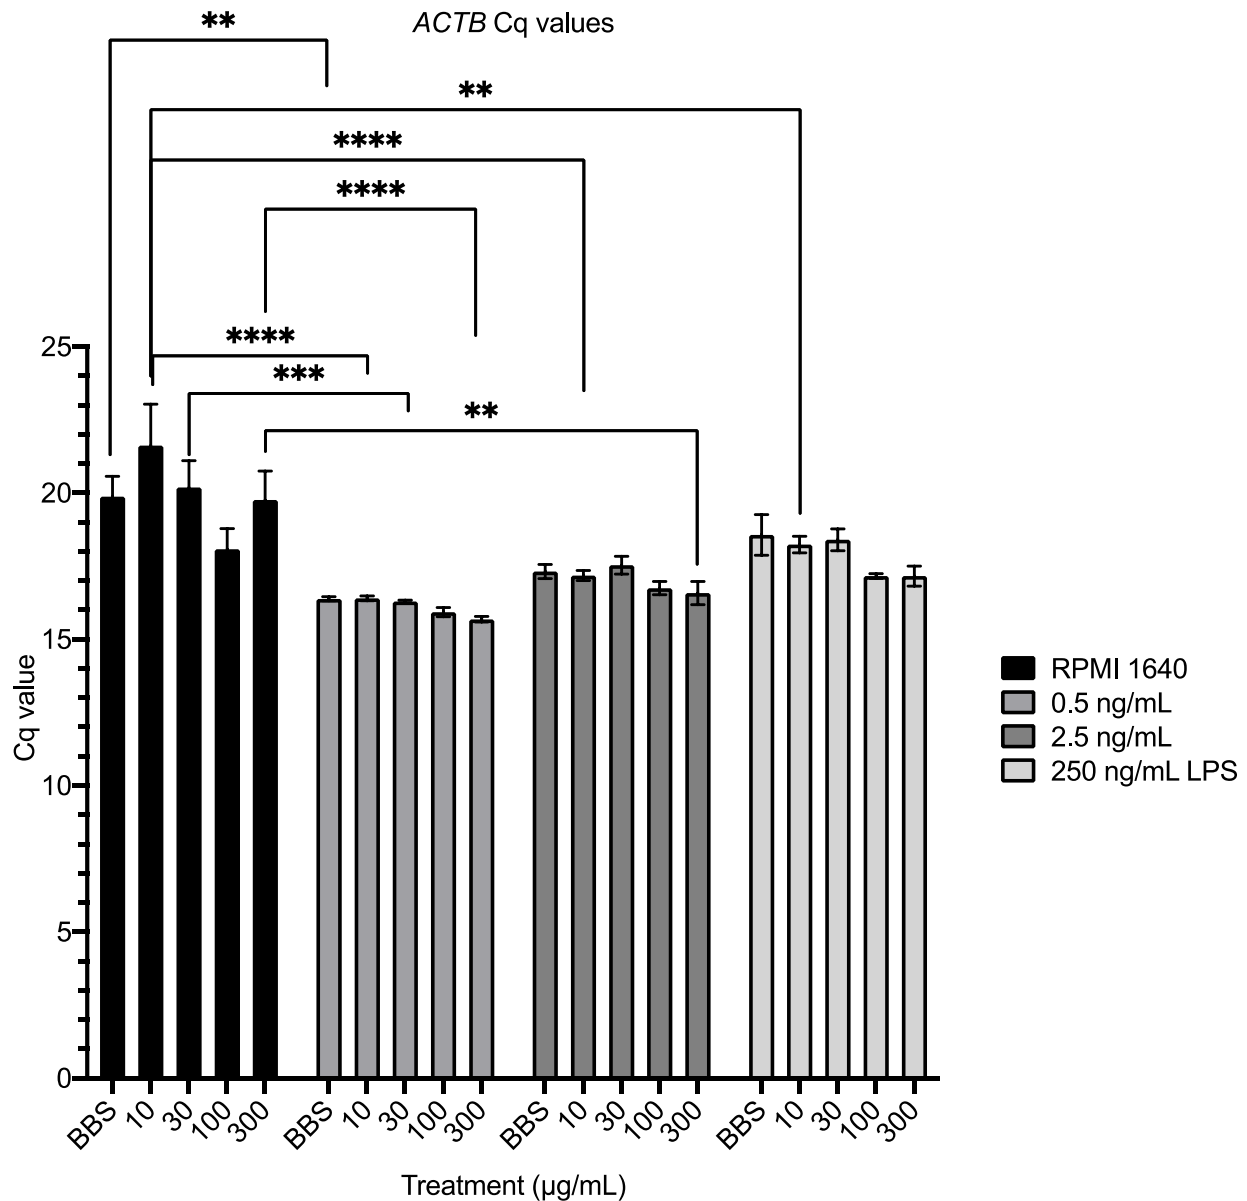

**Figure S12.** Effects of treatment of THP-1-derived macrophages with *M. vaccae* NCTC 11659 (0, 10, 30, 100, or 300  $\mu\text{g/mL}$ ; 48 h) and lipopolysaccharide (0, 250 ng/mL; 24 h) on the expression of *ACTB*. Abbreviations: BBS, borate-buffered saline. LPS, lipopolysaccharide.

#### S2.4. Validation of effects of heat-killed *M. vaccae* NCTC 11659 and LPS on proinflammatory *IL12A*, *IL12B*, and *IL23A* gene expression using real time RT-PCR

In the sections below, we describe results from experiments designed to measure expression of genes encoding major inflammatory cytokines in macrophages by extracting total RNA from THP-1 monocyte-derived macrophages and performing real time PCR as described above. Analysis of the housekeeping gene, *ACTB*, for differential expression across treatment groups found no meaningful differences in expression (Fig. S12, Supplementary Material online).

##### S2.4.1. *IL12A* mRNA expression

IL-12 production in macrophages is a marker of macrophages with a proinflammatory bias in mice (Orecchioni et al., 2019), and humans (Mantovani et al., 2004). Given IL-12 is a dimer between IL-12p35 (derived from *IL12A*) and IL-12p40 (derived from *IL12B*), *IL12A* and *IL12B* mRNA expression were measured in THP-1 monocyte-derived macrophages after incubating them with various concentrations of *M. vaccae* NCTC 11659 and LPS as described above. Analysis of *IL12A* mRNA expression revealed an *M. vaccae* NCTC 11659 x LPS interaction that approached statistical significance ( $F_{(12, 103)} = 1.784$ ,  $p = 0.06$ ), while main effects of *M. vaccae* NCTC 11659 and LPS were both significant (*M. vaccae* NCTC 11659,  $F_{(4, 103)} = 3.732$ ,  $p < 0.01$ ; LPS,  $F_{(3, 103)} = 22.92$ ,  $p < 0.001$ ). Despite many non-detects in the 0 ng/mL LPS control conditions (i.e., 67.5% of samples were RT-PCR non-detects, Table S1, Supplementary Material online), likely due to the lack of IFN- $\gamma$  stimulation (Ma et al., 2015; Ma et al., 1996; Grohmann et al., 2001), the trend was for higher concentrations of LPS to increase *IL12A* mRNA expression, and for *M. vaccae* NCTC 11659 to mitigate this effect. Challenging THP-1 monocyte-derived macrophages with 250 ng/mL LPS, relative to the RPMI 1640 control condition, increased *IL12A* mRNA expression in the 300  $\mu$ g/mL *M. vaccae* NCTC 11659 condition. *M. vaccae* NCTC 11659 had no effect on *IL12A* mRNA expression at any of the concentrations of LPS studied (Fig. S13A, Supplementary Material online). Post hoc  $p$  values for all planned pairwise comparisons can be found in Table S10, Supplementary Material online.

##### S2.4.2. *IL12B* mRNA expression

Analysis of *IL12B* mRNA expression revealed an *M. vaccae* NCTC 11659 x LPS interaction ( $F_{(12, 122)} = 13.02$ ,  $p < 0.001$ ) as well as main effects of *M. vaccae* NCTC 11659 ( $F_{(4, 122)} = 6.189$ ,  $p < 0.001$ ) and LPS ( $F_{(3, 122)} = 666.8$ ,  $p < 0.001$ ). Exposure of THP-1 monocyte-derived macrophages to *M. vaccae* NCTC 11659, in the absence of LPS or at a low concentration of LPS (0.5 ng/mL), increased *IL12B* mRNA expression in a concentration dependent manner (Fig. S13B, Supplementary Material online). Likewise, exposure of THP-1 monocyte-derived macrophages to LPS, in the absence of *M. vaccae* NCTC 11659, increased *IL12B* mRNA expression in a concentration dependent manner (Fig. S13B, Supplementary Material online). However, pretreatment with *M. vaccae* NCTC 11659 attenuated LPS-induced increases in *IL12B* mRNA expression at the highest concentration of LPS studied (i.e., 250 ng/mL; Fig. S13B, Supplementary Material online). Post hoc  $p$  values for all planned pairwise comparisons can be found in Table S10, Supplementary Material online.

##### S2.4.3. *IL23A* mRNA expression

IL-23, a dimer consisting of IL-12p40 and IL-23p19, production in macrophages is a marker of macrophages with a proinflammatory bias (Yamaguchi et al., 2017; Viola et al., 2019), but see (Hou et al., 2018). *IL23A* (encoding IL-23p19) mRNA expression was measured in THP-1 monocyte-derived macrophages after incubating them with various concentrations of *M. vaccae* NCTC 11659 and LPS as described above. Analysis of *IL23A* mRNA expression revealed an *M.*

*vaccae* NCTC 11659 x LPS interaction ( $F_{(12, 140)} = 13.88, p < 0.001$ ), an *M. vaccae* NCTC 11659 main effect that approached statistical significance ( $F_{(4, 140)} = 2.083, p = 0.086$ ), and an LPS main effect ( $F_{(3, 140)} = 13.02, p < 0.001$ ). Exposure of THP-1 monocyte-derived macrophages to *M. vaccae* NCTC 11659 in the absence of LPS increased *IL23A* mRNA expression in a concentration dependent manner (Fig. S13C, Supplementary Material online). Likewise, exposure of THP-1 monocyte-derived macrophages to LPS in the absence of *M. vaccae* NCTC 11659 increased *IL23A* mRNA expression in a concentration dependent manner (Fig. S13C, Supplementary Information online). However, pretreatment with *M. vaccae* NCTC 11659 attenuated LPS-induced increases in *IL23A* mRNA expression at the highest concentration of LPS studied (i.e., 250 ng/mL; Fig. S13C, Supplementary Material online). Post hoc  $p$  values for all planned pairwise comparisons can be found in Table S10, Supplementary Material online.

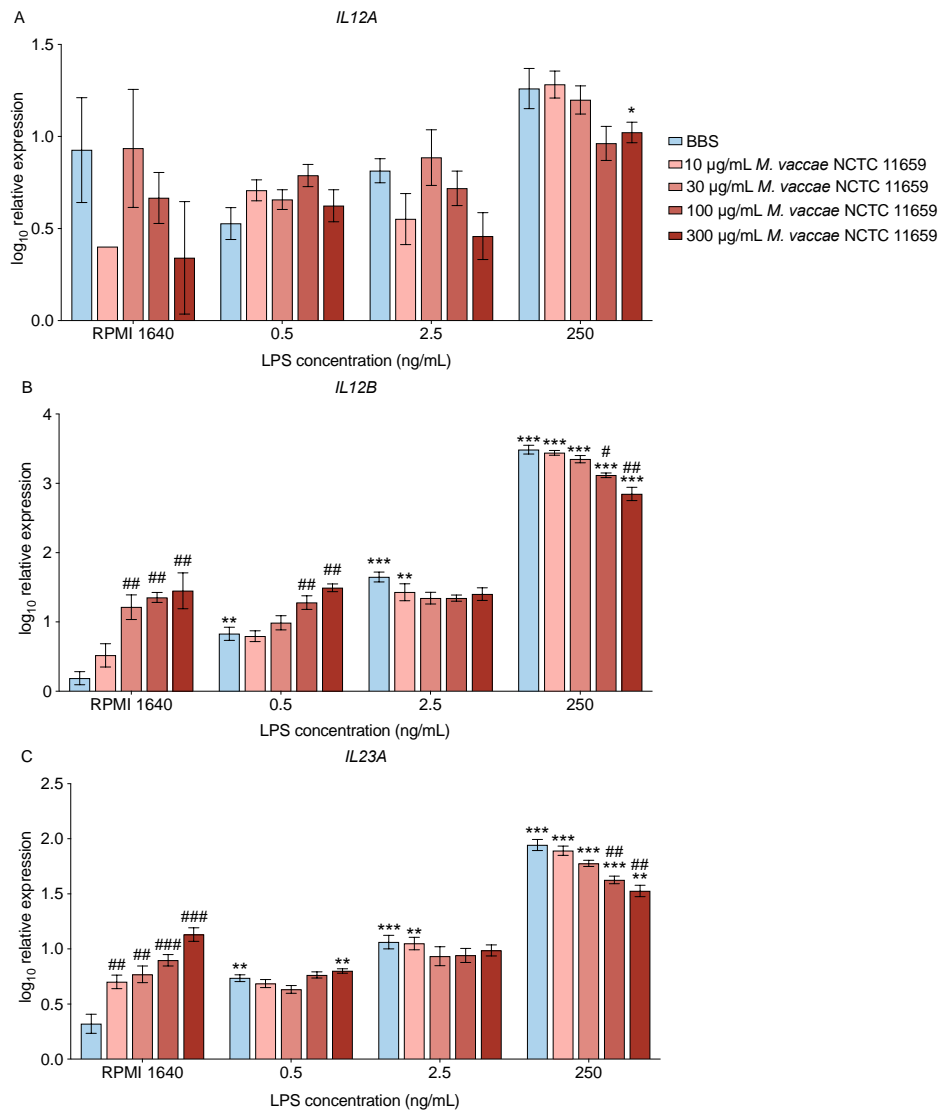

**Figure S13.** Heat-killed *M. vaccae* NCTC 11659 modulates lipopolysaccharide (LPS)-induced increases in inflammation in THP-1 monocyte-derived macrophages by downregulating inflammatory gene expression. Gene expression was measured using real time reverse

transcription polymerase chain reaction (RT-PCR) and is represented relative to the highest Cq value for each gene using the  $2^{-\Delta\Delta C_t}$  method. Data represent means  $\pm$  SEM. Numbers on the x-axis indicate the concentration of LPS in ng/mL. Data were analyzed using a two-way ANOVA followed by Dunnett's multiple comparisons tests using a single pooled error value from all 20 treatment groups, if appropriate, at a two-tailed alpha level of 0.05. Darker colors represent sequentially higher concentrations of *M. vaccae* NCTC 11659. \* $p < 0.05$ , \*\* $p < 0.01$ , \*\*\* $p < 0.001$ , effect of LPS, within the same *M. vaccae* NCTC 11659 condition, using RPMI 1640 groups as the comparison groups. # $p < 0.05$ , ## $p < 0.01$ , ### $p < 0.001$ , effect of *M. vaccae* NCTC 11659, within the same LPS condition, using the BBS condition as the comparison group. **A)** *IL12A* mRNA expression. **B)** *IL12B* mRNA expression. **C)** *IL23A* mRNA expression. Abbreviations: BBS, borate-buffered saline; LPS, lipopolysaccharide; NCTC, National Collection of Type Cultures. Sample sizes can be found in Table S1, Supplementary Material online.

### *S2.5. Effects of heat-killed M. vaccae NCTC 11659 and LPS on IL10 and TGFB1 mRNA expression*

IL-10 and TGF- $\beta$ 1 production are biomarkers of macrophages with an anti-inflammatory bias (Viola et al., 2019). *IL10* and *TGFB1* gene expression levels were measured in THP-1 monocyte-derived macrophages after incubating them with various concentrations of *M. vaccae* NCTC 11659 and LPS as described above.

#### *S2.5.1. IL10 mRNA expression*

Analysis of *IL10* mRNA expression revealed an *M. vaccae* NCTC 11659 x LPS interaction ( $F_{(12, 139)} = 2.971$ ,  $p < 0.001$ ) as well as main effects of *M. vaccae* NCTC 11659 ( $F_{(4, 139)} = 14.81$ ,  $p < 0.001$ ) and LPS ( $F_{(3, 139)} = 4.149$ ,  $p < 0.01$ ). Exposure of THP-1 monocyte-derived macrophages to *M. vaccae* NCTC 11659 in the absence of LPS increased *IL10* mRNA expression (Fig. S14A, Supplementary Material online). At intermediate concentrations of LPS (i.e., 0.5 and 2.5 ng/mL), *M. vaccae* NCTC 11659 decreased *IL10* mRNA expression (Fig. S14A, Supplementary Material online). Exposure to THP-1-derived macrophages to LPS in the absence of *M. vaccae* NCTC 11659 increased *IL10* mRNA expression in a concentration dependent manner with the exception of the 250 ng/mL concentration of LPS (Fig. S14A, Supplementary Material online). Post hoc  $p$  values for planned pairwise comparisons can be found in Table S10, Supplementary Information online.

#### *S2.5.2. TGFB1 mRNA expression*

Analysis of *TGFB1* mRNA expression revealed an *M. vaccae* NCTC 11659 x LPS interaction ( $F_{(12, 137)} = 2.99$ ,  $p < 0.001$ ) as well as main effects of *M. vaccae* NCTC 11659 ( $F_{(4, 137)} = 4.37$ ,  $p < 0.01$ ) and LPS ( $F_{(3, 137)} = 18.86$ ,  $p < 0.001$ ). Exposure of THP-1 monocyte-derived macrophages to *M. vaccae* NCTC 11659 affected *TGFB1* mRNA expression only in the 2.5 ng/mL LPS condition, where it decreased *TGFB1* mRNA expression in the 30  $\mu$ g/mL concentration of *M. vaccae* NCTC 11659 and increased *TGFB1* mRNA expression at the highest concentration (300  $\mu$ g/mL; Fig. S14B, Supplementary Material online). Exposure of THP-1 monocyte-derived macrophages to LPS in the absence of *M. vaccae* NCTC 11659 decreased *TGFB1* expression in the 2.5 ng/mL LPS condition (Fig. S14B, Supplementary Material online). Pretreatment with *M. vaccae* NCTC 11659 (300  $\mu$ g/mL) attenuated LPS-induced decreases in *TGFB1* mRNA expression in the 2.5 ng/mL LPS condition (Fig. S14B, Supplementary Information online). Post hoc  $p$  values for planned pairwise comparisons can be found in Table S10, Supplementary Material online.

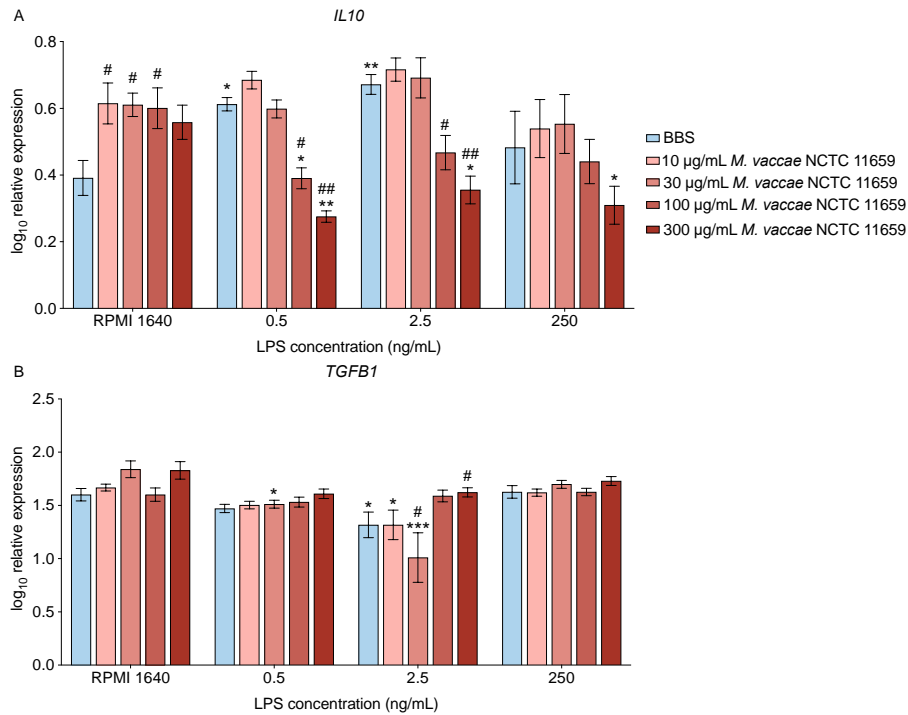

**Figure S14.** Heat-killed *M. vaccae* NCTC 11659 alone upregulates *IL10* mRNA expression and, among THP-1 monocyte-derived macrophages subsequently stimulated with LPS, downregulates *IL10* mRNA expression and differentially regulates *TGFB1* mRNA expression. Gene expression was measured using real time reverse transcription polymerase chain reaction (RT-PCR) and is represented relative to the highest Cq value for each gene. Data represent means  $\pm$  SEM. Numbers on the x-axis indicate the concentration of LPS in ng/mL. Data were analyzed using a two-way ANOVA followed by Dunnett's multiple comparisons test using a single pooled error value from all 20 treatment groups, if appropriate, at a two-tailed alpha level of 0.05. Darker colors represent sequentially higher concentrations of *M. vaccae* NCTC 11659. \* $p < 0.05$ , \*\* $p < 0.01$ , \*\*\* $p < 0.001$ , effect of LPS, within the same *M. vaccae* NCTC 11659 condition, using RPMI 1640 groups as the comparison groups. # $p < 0.05$ , ## $p < 0.01$ , ### $p < 0.001$ , effect of *M. vaccae* NCTC 11659, within the same LPS condition, using the BBS condition as the comparison group. **A)** *IL10* mRNA expression upon challenge with different concentrations of *M. vaccae* NCTC 11659 and LPS. **B)** *TGFB1* mRNA expression upon challenge with different concentrations of *M. vaccae* NCTC 11659 and LPS. Abbreviations: BBS, borate-buffered saline; LPS, lipopolysaccharide; NCTC, National Collection of Type Cultures. Sample sizes can be found in Table S1, Supplemental Information online.

## *S2.6. Effects of heat-killed *M. vaccae* NCTC 11659 and LPS on *TGFB1:IL12A*, *TGFB1:IL12B*, and *TGFB1:IL23A* ratios*

### *S2.6.1. *TGFB1:IL12A* mRNA expression ratio*

As mentioned above, expression levels of *IL12A*, *IL12B*, *IL23A*, and *TGFB1* are important in their own right to characterize the immune environment, but the ratio between anti-inflammatory and inflammatory cytokines in the environment is an important feature of macrophage polarization. For example, high expression of IL-12, but low expression of TGF- $\beta$ 1, is characteristic of macrophages with a proinflammatory bias (Mantovani et al., 2004; Viola et al., 2019). In contrast, high expression of TGF- $\beta$ 1, but low expression of IL-12, is characteristic of macrophages with an anti-inflammatory bias, particularly macrophages implicated in anti-inflammatory and immunosuppressive effects (Mantovani et al., 2004; Viola et al., 2019). This suggests that the ratio of *TGFB1* to *IL12A*, *IL12B*, and *IL23A* may be a meaningful measure of macrophage polarization. The ratio of *TGFB1* to *IL12A* expression was calculated in THP-1 monocyte-derived macrophages after incubating them with various doses of *M. vaccae* NCTC 11659 and LPS as described above. In line with low expression of *IL12A* mRNA in the vehicle (0 ng/mL LPS) condition, 67.5% of *TGFB1:IL12A* mRNA expression ratio data were real time RT-PCR non-detects (Table S9, Supplementary Material online). Analysis of the *TGFB1:IL12A* mRNA expression ratio revealed an *M. vaccae* NCTC 11659 x LPS interaction ( $F_{(12, 102)} = 2.73$ ,  $p < 0.01$ ) as well as main effects of *M. vaccae* NCTC 11659 ( $F_{(4, 102)} = 6.07$ ,  $p < 0.001$ ) and LPS ( $F_{(3, 102)} = 10.04$ ,  $p < 0.001$ ). Exposure of THP-1 monocyte-derived macrophages to the highest concentration of *M. vaccae* NCTC 11659 (300  $\mu$ g/mL) in the presence of 2.5 ng/mL LPS increased the *TGFB1:IL12A* mRNA expression ratio (Fig. S15A). Exposure of THP-1 monocyte-derived macrophages to LPS in the absence of *M. vaccae* NCTC 11659 did not affect the *TGFB1:IL12A* mRNA expression ratio. Post hoc  $p$  values for planned pairwise comparisons can be found in Table S10, Supplementary Material online.

### *S2.6.2. *TGFB1:IL12B* mRNA expression ratio*

The ratio of *TGFB1* to *IL12B* expression was calculated in THP-1 monocyte-derived macrophages after incubating them with various doses of *M. vaccae* NCTC 11659 and LPS as described above. Analysis of the *TGFB1:IL12B* mRNA expression ratios revealed an *M. vaccae* NCTC 11659 x LPS interaction ( $F_{(12, 119)} = 8.70$ ,  $p < 0.001$ ); there was no main effect of *M. vaccae* NCTC 11659 ( $F_{(4, 119)} = 1.962$ ,  $p = 0.10$ ), but there was a main effect of LPS ( $F_{(3, 119)} = 320.2$ ,  $p < 0.001$ ). Exposure of THP-1 monocyte-derived macrophages to *M. vaccae* NCTC 11659 in the absence of LPS and in the presence of 0.5 ng/mL LPS dose-dependently decreased the *TGFB1:IL12B* mRNA expression ratio (Fig. S15B). Likewise, exposure of THP-1 monocyte-derived macrophages to LPS in the absence of *M. vaccae* NCTC 11659 dose dependently decreased the *TGFB1:IL12B* mRNA expression ratio (Fig. S15B). In contrast, pretreatment with *M. vaccae* NCTC 11659 increased the *TGFB1:IL12B* mRNA expression ratio in the presence of higher concentrations of LPS (2.5 ng/mL and 250 ng/mL; Fig. S15B), consistent with potential anti-inflammatory effects of *M. vaccae* NCTC 11659 under these conditions. Post hoc  $p$  values for planned pairwise comparisons can be found in Table S10, Supplementary Material online.

### *S2.6.3. *TGFB1:IL23A* mRNA expression ratio*

The ratio of *TGFB1* to *IL23A* expression was calculated in THP-1 monocyte-derived macrophages after incubating them with various doses of *M. vaccae* NCTC 11659 and LPS as

described above. Analysis of the *TGFB1:IL23A* mRNA expression ratios revealed an *M. vaccae* NCTC 11659 x LPS interaction ( $F_{(12, 137)} = 5.909, p < 0.001$ ); there was no main effect of *M. vaccae* NCTC 11659 ( $F_{(4, 137)} = 1.18, p = 0.32$ ), but there was a main effect of LPS ( $F_{(3, 137)} = 123.3, p < 0.001$ ). Exposure of THP-1 monocyte-derived macrophages to *M. vaccae* NCTC 11659 in the absence of LPS dose dependently decreased the *TGFB1:IL23A* mRNA expression ratio (Fig. S15C). Likewise, exposure of THP-1 monocyte-derived macrophages to LPS in the absence of *M. vaccae* NCTC 11659 dose dependently decreased the *TGFB1:IL23A* mRNA expression ratio (Fig. S15C). In contrast, pretreatment with *M. vaccae* NCTC 11659 increased the *TGFB1:IL23A* mRNA expression ratio in the presence of higher concentrations of LPS (2.5 ng/mL and 250 ng/mL; Fig. S15C), consistent with potential anti-inflammatory effects of *M. vaccae* NCTC 11659 under these conditions. Post hoc *p* values for planned pairwise comparisons can be found in Table S10, Supplemental Information online.

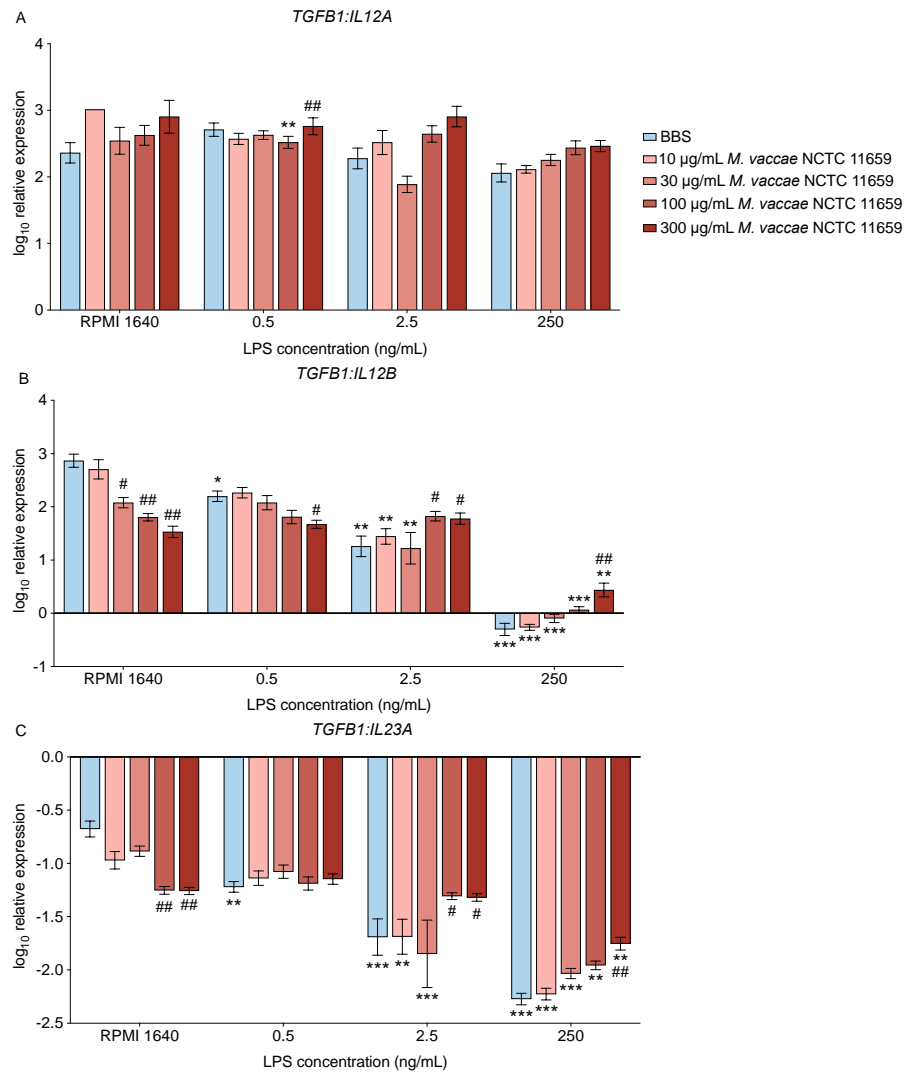

**Figure S15.** Heat-killed *M. vaccae* NCTC 11659 modulates lipopolysaccharide (LPS)-induced exaggeration of inflammation in THP-1 monocyte-derived macrophages by increasing the ratio of *TGFBI* expression to inflammatory gene expression. Gene expression was measured using real time reverse transcription polymerase chain reaction (RT-PCR) and is represented relative to the highest Cq value for each gene. Data represent means  $\pm$  SEM. Numbers on the x-axis indicate the concentration of LPS in ng/mL. Data were analyzed using a two-way ANOVA followed by Dunnett's multiple comparisons test using a single pooled error value from all 20 treatment groups, if appropriate, at a two-tailed alpha level of 0.05. Darker colors represent sequentially higher concentrations of *M. vaccae* NCTC 11659. \* $p < 0.05$ , \*\* $p < 0.01$ , \*\*\* $p < 0.001$ , effect of LPS, within the same *M. vaccae* NCTC 11659 condition, using the RPMI 1640 groups as the comparison groups. # $p < 0.05$ , ## $p < 0.01$ , ### $p < 0.001$ , effect of *M. vaccae* NCTC 11659, within the same LPS condition, using the BBS condition as the comparison group. **A)** *TGFBI:IL12A* mRNA expression ratio upon challenge with different concentrations of *M. vaccae* NCTC 11659 and LPS. **B)** *TGFBI:IL12B* mRNA expression ratio upon challenge with different concentrations of *M. vaccae* NCTC 11659 and LPS. **C)** *TGFBI:IL23A* mRNA expression ratio upon challenge with different concentrations of *M. vaccae* NCTC 11659 and



LPS. Abbreviations: BBS, borate-buffered saline; LPS, lipopolysaccharide; NCTC, National Collection of Type Cultures. Sample sizes can be found in Table S1, Supplemental Information online.

### S3. Supplemental Materials and Methods

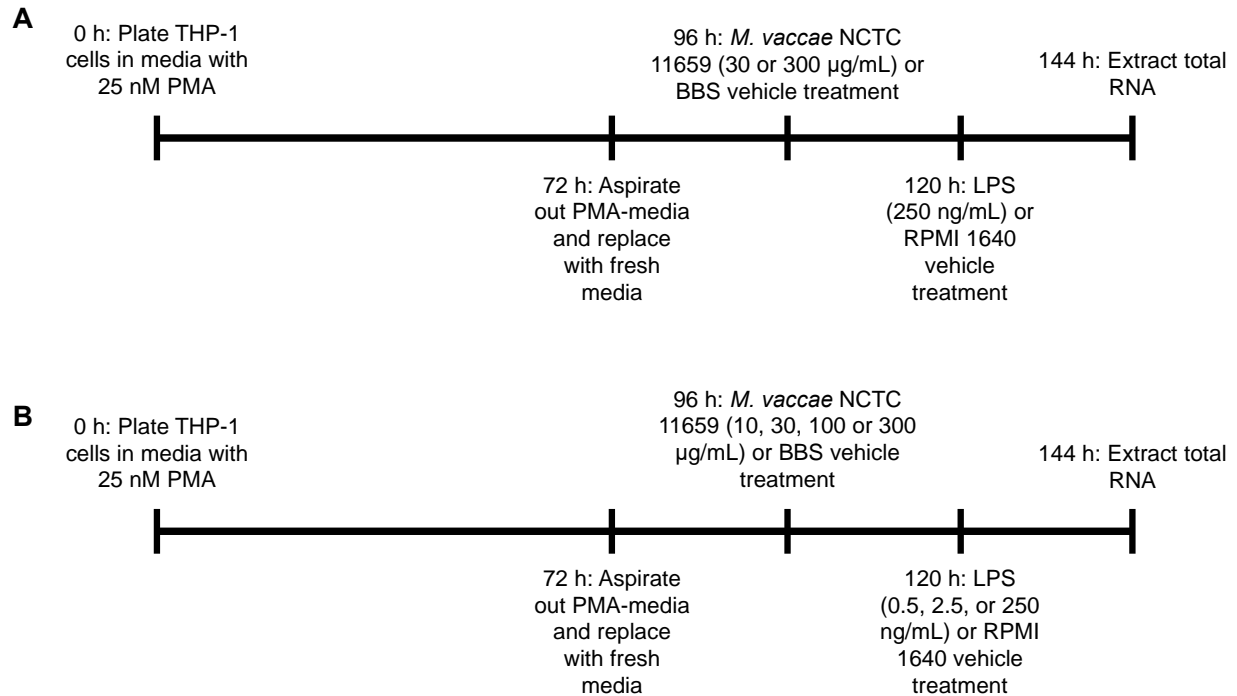

**Figure S16.** Summary of experimental timelines for (A) *Experiment 1* and (B) *Experiment 2*. Abbreviations: BBS, borate-buffered saline; LPS, lipopolysaccharide; NCTC, National Collection of Type Cultures; PMA, phorbol 12-myristate 13-acetate; RNA, ribonucleic acid.

#### S3.1. Flow cytometry for assessment of cell viability

Cell plates containing 525 µL/well were centrifuged at 500 x g for 5 minutes at room temperature. After removing cell media, adherent differentiated cells were collected by pipetting 0.5 mL of 5 mM ethylenediaminetetraacetic acid-phosphate buffered solution (EDTA, Cat. No. E4884, Sigma-Aldrich; PBS: sodium chloride, Cat. No. BP358-212, Fisher Scientific, Fair Lawn, New Jersey, USA; potassium phosphate monobasic, Cat. No. P286-1, Fisher Scientific; sodium phosphate dibasic anhydrous, Cat. No. S374-500, Fisher Scientific; potassium chloride, Cat. No. P217-500, Fisher Scientific) into each well and pipetting up and down. Cell viability was assessed by flow cytometry gating of live singlets based on forward and side scatter (FSC/SSC). Flow cytometry was performed with an independent set of cells separate from those used for real time RT-qPCR. Sample sizes for flow cytometry studies are listed in Table S1. Flow cytometry was conducted using a BD Special Order FACSArray™ Bioanalyzer machine (serial no. W91100224, BD Biosciences, Franklin Lakes, NJ, USA). All downstream analysis was carried out using the FlowJo Software (version 10.1, FlowJo, LLC., Ashland, OR, USA).

### *S3.2. Flow cytometry statistical analysis*

Flow cytometry data for cell viability analysis were represented as the percent of cells viable to the mean of the BBS vehicle/RPMI 1640 vehicle group, which was done by taking the gate for live cells. Flow cytometry data were analyzed using two-way ANOVA followed by Dunnett's multiple comparisons test, if appropriate, at a two-tailed alpha level of 0.05.

**Table S1.** Sample sizes (*n*) for the flow cytometry experiment cell viability in response to *M. vaccae* NCTC 11659 and lipopolysaccharide (LPS). Sample size represents 1 experimental replicate.

| <b>LPS Treatment</b> | <b>Bacterial Treatment</b>            | <b>Sample Size (<i>n</i>)</b> |
|----------------------|---------------------------------------|-------------------------------|
| 0 ng/mL              | BBS                                   | 5                             |
|                      | 10 µg/mL <i>M. vaccae</i> NCTC 11659  | 5                             |
|                      | 30 µg/mL <i>M. vaccae</i> NCTC 11659  | 5                             |
|                      | 100 µg/mL <i>M. vaccae</i> NCTC 11659 | 5                             |
|                      | 300 µg/mL <i>M. vaccae</i> NCTC 11659 | 5                             |
| 250 ng/mL            | BBS                                   | 4                             |
|                      | 10 µg/mL <i>M. vaccae</i> NCTC 11659  | 4                             |
|                      | 30 µg/mL <i>M. vaccae</i> NCTC 11659  | 4                             |
|                      | 100 µg/mL <i>M. vaccae</i> NCTC 11659 | 4                             |
|                      | 300 µg/mL <i>M. vaccae</i> NCTC 11659 | 4                             |
| 0 ng/mL              | BBS                                   | 5                             |
|                      | 10 µg/mL <i>M. vaccae</i> NCTC 11659  | 5                             |
|                      | 30 µg/mL <i>M. vaccae</i> NCTC 11659  | 5                             |
|                      | 100 µg/mL <i>M. vaccae</i> NCTC 11659 | 5                             |
|                      | 300 µg/mL <i>M. vaccae</i> NCTC 11659 | 5                             |
| 250 ng/mL            | BBS                                   | 4                             |
|                      | 10 µg/mL <i>M. vaccae</i> NCTC 11659  | 4                             |
|                      | 30 µg/mL <i>M. vaccae</i> NCTC 11659  | 4                             |
|                      | 100 µg/mL <i>M. vaccae</i> NCTC 11659 | 4                             |
|                      | 300 µg/mL <i>M. vaccae</i> NCTC 11659 | 4                             |

**Table S2.** Fold changes among differentially expressed genes for the BBS/250 ng/mL LPS vs BBS/RPMI 1640 comparison in *Experiment 1* using the NanoString platform.

| Gene symbol    | log2FoldChange |
|----------------|----------------|
| Upregulated    |                |
| <i>IFI44</i>   | 4.262269026    |
| <i>CCL5</i>    | 4.228568845    |
| <i>IL8</i>     | 4.159731409    |
| <i>CCL3</i>    | 3.765570054    |
| <i>CXCL10</i>  | 3.661646101    |
| <i>IL1B</i>    | 3.530651461    |
| <i>MX2</i>     | 3.500801064    |
| <i>CCL2</i>    | 3.348462814    |
| <i>CXCL1</i>   | 3.16835941     |
| <i>STAT1</i>   | 3.051809072    |
| <i>CCL4</i>    | 2.850338226    |
| <i>CCR7</i>    | 2.825718296    |
| <i>IFIT2</i>   | 2.804308939    |
| <i>RELB</i>    | 2.748962417    |
| <i>IFIT1</i>   | 2.743794411    |
| <i>OAS2</i>    | 2.667257557    |
| <i>MMP9</i>    | 2.662598429    |
| <i>CXCL3</i>   | 2.529580501    |
| <i>MX1</i>     | 2.487862151    |
| <i>CCL22</i>   | 2.445586712    |
| <i>CXCL2</i>   | 2.431240533    |
| <i>IFIT3</i>   | 2.382447108    |
| <i>NOD1</i>    | 2.230599396    |
| <i>CD40</i>    | 2.103029474    |
| <i>OASL</i>    | 2.062527622    |
| <i>MAFF</i>    | 1.837931872    |
| <i>IL1RN</i>   | 1.810310897    |
| <i>NFKB1</i>   | 1.744320545    |
| <i>CXCR2</i>   | 1.663204849    |
| <i>IRF7</i>    | 1.572842636    |
| <i>TGFB2</i>   | 1.572199863    |
| <i>MYD88</i>   | 1.55351638     |
| <i>IL23A</i>   | 1.514079188    |
| <i>RIPK2</i>   | 1.491068592    |
| <i>HLA-DRA</i> | 1.485166012    |

|                |              |
|----------------|--------------|
| <i>RPS6KA5</i> | 1.420754255  |
| <i>LTB</i>     | 1.416792999  |
| <i>TNFAIP3</i> | 1.326074938  |
| <i>C1QA</i>    | 1.291248673  |
| <i>STAT2</i>   | 1.207951243  |
| <i>CCL20</i>   | 1.203041045  |
| <i>MAP2K6</i>  | 1.156471185  |
| <i>NOD2</i>    | 1.126930781  |
| <i>CCL23</i>   | 1.102917155  |
| <i>MAPK8</i>   | 0.985073941  |
| <i>CXCL6</i>   | 0.940690292  |
| <i>CXCR4</i>   | 0.932173675  |
| <i>CFB</i>     | 0.930713986  |
| <i>CEBPB</i>   | 0.92956128   |
| <i>CCL24</i>   | 0.875357784  |
| <i>TLR5</i>    | 0.83638696   |
| <i>TRADD</i>   | 0.787948598  |
| <i>TLR6</i>    | 0.737944965  |
| <i>ELK1</i>    | 0.697904269  |
| <i>CCL8</i>    | 0.626491937  |
| <i>SMAD7</i>   | 0.613347757  |
| <i>C3AR1</i>   | 0.599176377  |
| Downregulated  |              |
| <i>TREM2</i>   | -3.548187492 |
| <i>PTGS1</i>   | -2.532871722 |
| <i>TGFBR1</i>  | -2.489080777 |
| <i>HDAC4</i>   | -2.424431522 |
| <i>MEF2C</i>   | -2.125305204 |
| <i>GRB2</i>    | -2.057306367 |
| <i>TLR4</i>    | -1.913291151 |
| <i>LIMK1</i>   | -1.812929182 |
| <i>ALOX5</i>   | -1.804872332 |
| <i>IL18</i>    | -1.790840137 |
| <i>IL1R1</i>   | -1.76824     |
| <i>ROCK2</i>   | -1.730590858 |
| <i>HMGB2</i>   | -1.727870056 |
| <i>IL6R</i>    | -1.690664298 |
| <i>PRKCB</i>   | -1.579542716 |
| <i>FOS</i>     | -1.520073498 |

|                 |              |
|-----------------|--------------|
| <i>HMGB1</i>    | -1.48640968  |
| <i>GNAS</i>     | -1.479297821 |
| <i>LY96</i>     | -1.476827195 |
| <i>MAX</i>      | -1.421829881 |
| <i>HSPB1</i>    | -1.394916551 |
| <i>CD4</i>      | -1.329394552 |
| <i>RAPGEF2</i>  | -1.226831758 |
| <i>MAPKAPK2</i> | -1.168885773 |
| <i>BIRC2</i>    | -1.164865848 |
| <i>PLA2G4A</i>  | -1.157716781 |
| <i>MAPKAPK5</i> | -1.130769454 |
| <i>DDIT3</i>    | -1.054315672 |
| <i>PDGFA</i>    | -1.052492146 |
| <i>TYROBP</i>   | -1.040038705 |
| <i>GNAQ</i>     | -1.019696587 |
| <i>IRF1</i>     | -0.997193312 |
| <i>HRAS</i>     | -0.991733602 |
| <i>MAPK14</i>   | -0.920002433 |
| <i>STAT3</i>    | -0.895976194 |
| <i>MEF2D</i>    | -0.888962215 |
| <i>RIPK1</i>    | -0.85750619  |
| <i>MAP3K7</i>   | -0.835212496 |
| <i>CD163</i>    | -0.789549572 |
| <i>NLRP3</i>    | -0.77122709  |
| <i>MKNK1</i>    | -0.760232478 |
| <i>MAP3K1</i>   | -0.737623351 |
| <i>HMGNI</i>    | -0.728439309 |
| <i>HIF1A</i>    | -0.713836198 |
| <i>NFATC3</i>   | -0.687810068 |
| <i>CREB1</i>    | -0.677395388 |
| <i>MYC</i>      | -0.665728171 |
| <i>AGER</i>     | -0.653885323 |
| <i>TLR1</i>     | -0.627990698 |
| <i>RAC1</i>     | -0.593136501 |

**Table S3.** Fold changes among differentially expressed genes for the 300 µg/mL *M. vaccae* NCTC 11659/RPMI 1640 vs BBS/RPMI 1640 comparison in *Experiment 1* using the NanoString platform.

| Gene symbol     | log2FoldChange |
|-----------------|----------------|
| Upregulated     |                |
| <i>CCL8</i>     | 4.89690652     |
| <i>CFB</i>      | 4.430250149    |
| <i>CCL13</i>    | 3.870692489    |
| <i>MAFF</i>     | 3.860842614    |
| <i>IFIT2</i>    | 3.720039294    |
| <i>MMP9</i>     | 3.520145054    |
| <i>IFIT3</i>    | 3.431284527    |
| <i>KEAP1</i>    | 3.360990863    |
| <i>IL10</i>     | 3.239398915    |
| <i>C1S</i>      | 2.862037841    |
| <i>CXCL1</i>    | 2.782482056    |
| <i>IRF7</i>     | 2.763613935    |
| <i>CXCL5</i>    | 2.747719032    |
| <i>CD40</i>     | 2.639664337    |
| <i>IFI44</i>    | 2.528043214    |
| <i>TRADD</i>    | 2.427985433    |
| <i>OASL</i>     | 2.376190291    |
| <i>IL8</i>      | 2.225557551    |
| <i>RELB</i>     | 2.159524239    |
| <i>NFKB1</i>    | 2.10983004     |
| <i>HLA-DRA</i>  | 1.910535992    |
| <i>RELA</i>     | 1.905547488    |
| <i>MAPK3</i>    | 1.807589712    |
| <i>MAP3K5</i>   | 1.767905581    |
| <i>CXCL10</i>   | 1.745745502    |
| <i>C3</i>       | 1.67081143     |
| <i>SMAD7</i>    | 1.592342315    |
| <i>CD163</i>    | 1.547699987    |
| <i>MRC1</i>     | 1.547476852    |
| <i>ALOX5</i>    | 1.533939839    |
| <i>RAPGEF2</i>  | 1.512887703    |
| <i>ITGB2</i>    | 1.51025086     |
| <i>TRAF2</i>    | 1.484385294    |
| <i>HLA-DRB1</i> | 1.41103933     |

|                |              |
|----------------|--------------|
| <i>CXCR4</i>   | 1.385213822  |
| <i>IL15</i>    | 1.341519769  |
| <i>IL1B</i>    | 1.321287767  |
| <i>IL6R</i>    | 1.307791409  |
| <i>NFE2L2</i>  | 1.257189249  |
| <i>RHOA</i>    | 1.224671416  |
| <i>PTGER4</i>  | 1.218333365  |
| <i>CCL2</i>    | 1.211098382  |
| <i>GNAQ</i>    | 1.196668767  |
| <i>IL11</i>    | 1.196521436  |
| <i>AREG</i>    | 1.177134361  |
| <i>DAXX</i>    | 1.176135067  |
| <i>RAC1</i>    | 1.161219841  |
| <i>CCL3</i>    | 1.098591596  |
| <i>CCL5</i>    | 1.055958887  |
| <i>C3AR1</i>   | 1.033466277  |
| <i>CCL4</i>    | 1.019245099  |
| <i>TNF</i>     | 1.010907794  |
| <i>PTGIR</i>   | 0.993283114  |
| <i>CD4</i>     | 0.961464272  |
| <i>CSF3</i>    | 0.889676629  |
| <i>DEFA1</i>   | 0.884852623  |
| <i>TGFBR1</i>  | 0.881763235  |
| <i>NFATC3</i>  | 0.840590723  |
| <i>IRF5</i>    | 0.801880014  |
| <i>CFD</i>     | 0.772920032  |
| <i>HSPB1</i>   | 0.756997065  |
| <i>NOD2</i>    | 0.745261634  |
| <i>CXCL2</i>   | 0.743951576  |
| <i>CCR1</i>    | 0.736963034  |
| <i>ELK1</i>    | 0.698647747  |
| <i>PRKCB</i>   | 0.645457851  |
| <i>FXYD2</i>   | 0.621906369  |
| <i>LTB</i>     | 0.619950676  |
| Downregulated  |              |
| <i>PLA2G4A</i> | -5.144740794 |
| <i>TNFSF14</i> | -5.100462031 |
| <i>MX1</i>     | -5.005120687 |
| <i>AGER</i>    | -4.778907627 |



|                 |              |
|-----------------|--------------|
| <i>RPS6KA5</i>  | -3.392627591 |
| <i>PPP1R12B</i> | -3.33328838  |
| <i>C5</i>       | -3.032903984 |
| <i>TGFB2</i>    | -2.902286516 |
| <i>IL1RAP</i>   | -2.55178396  |
| <i>TLR4</i>     | -2.534433312 |
| <i>PTGS2</i>    | -2.531511955 |
| <i>OXER1</i>    | -2.513443302 |
| <i>NOD1</i>     | -2.362597471 |
| <i>PDGFA</i>    | -2.359872495 |
| <i>MAP2K1</i>   | -2.139549594 |
| <i>TLR5</i>     | -1.972131517 |
| <i>OAS2</i>     | -1.789295679 |
| <i>CYSLTR1</i>  | -1.71961854  |
| <i>IFIT1</i>    | -1.697762641 |
| <i>LTB4R</i>    | -1.619607434 |
| <i>PRKCA</i>    | -1.613126296 |
| <i>FOS</i>      | -1.524388349 |
| <i>HRAS</i>     | -1.498999247 |
| <i>TCF4</i>     | -1.435626898 |
| <i>TLR1</i>     | -1.419172567 |
| <i>CXCR2</i>    | -1.3854188   |
| <i>MAPK8</i>    | -1.287056878 |
| <i>C1QB</i>     | -1.28606134  |
| <i>CXCL6</i>    | -1.177120774 |
| <i>MYC</i>      | -1.174193238 |
| <i>TLR6</i>     | -1.125992285 |
| <i>MAX</i>      | -1.112550891 |
| <i>CD86</i>     | -1.103115614 |
| <i>MEF2C</i>    | -1.085875385 |
| <i>IL23R</i>    | -1.039724013 |
| <i>TLR7</i>     | -0.995868956 |
| <i>MAP2K6</i>   | -0.973545549 |
| <i>LTB4R2</i>   | -0.962118237 |
| <i>HIF1A</i>    | -0.925925934 |
| <i>MAPK1</i>    | -0.824273447 |
| <i>MX2</i>      | -0.776580478 |
| <i>MKNK1</i>    | -0.772712802 |
| <i>IL1R1</i>    | -0.767024105 |

|                 |              |
|-----------------|--------------|
| <i>MAPKAPK2</i> | -0.757813202 |
| <i>TOLLIP</i>   | -0.755326387 |
| <i>HMGB1</i>    | -0.753189183 |
| <i>IL18</i>     | -0.737871444 |
| <i>CCR2</i>     | -0.733063666 |
| <i>C1QA</i>     | -0.723428349 |
| <i>HMGB2</i>    | -0.672598711 |
| <i>CCL22</i>    | -0.647010509 |
| <i>PTK2</i>     | -0.608116411 |

**Table S4.** Fold changes among differentially expressed genes for the 300 µg/mL *M. vaccae* NCTC 11659/250 ng/mL LPS vs BBS/250 ng/mL LPS comparison in *Experiment 1* using the NanoString platform.

| Gene symbol    | log2FoldChange |
|----------------|----------------|
| Upregulated    |                |
| <i>LTB4R2</i>  | 3.087050466    |
| <i>CXCR2</i>   | 3.05915473     |
| <i>MAP2K6</i>  | 2.819087782    |
| <i>NFATC3</i>  | 2.25194415     |
| <i>IL23A</i>   | 2.247266952    |
| <i>ALOX5</i>   | 2.16121367     |
| <i>IL1RAP</i>  | 1.738176198    |
| <i>MRC1</i>    | 1.681382612    |
| <i>MAPK1</i>   | 1.648627325    |
| <i>TGFB2</i>   | 1.64577741     |
| <i>C5</i>      | 1.593725862    |
| <i>NOD2</i>    | 1.50209677     |
| <i>MAPK8</i>   | 1.491295888    |
| <i>NFKB1</i>   | 1.460314226    |
| <i>TLR8</i>    | 1.447373153    |
| <i>LTB4R</i>   | 1.404433165    |
| <i>HDAC4</i>   | 1.402348842    |
| <i>MAPK3</i>   | 1.291189699    |
| <i>IL10</i>    | 1.289208553    |
| <i>MAP3K1</i>  | 1.270090708    |
| <i>MYC</i>     | 1.26044476     |
| <i>CXCR4</i>   | 1.232853584    |
| <i>GNAQ</i>    | 1.221348027    |
| <i>IL10RB</i>  | 1.215773582    |
| <i>RELB</i>    | 1.193184076    |
| <i>CD163</i>   | 1.181033116    |
| <i>TLR4</i>    | 1.104777136    |
| <i>TGFBRI</i>  | 1.099294031    |
| <i>ROCK2</i>   | 1.088525522    |
| <i>RHOA</i>    | 1.080929738    |
| <i>NOD1</i>    | 1.068606356    |
| <i>SMAD7</i>   | 1.055497516    |
| <i>CYSLTR1</i> | 0.986892275    |
| <i>C2</i>      | 0.986476297    |

|                 |              |
|-----------------|--------------|
| <i>MAPKAPK5</i> | 0.976870297  |
| <i>ELK1</i>     | 0.971771149  |
| <i>KEAP1</i>    | 0.959985562  |
| <i>RPS6KA5</i>  | 0.889956977  |
| <i>PRKCB</i>    | 0.850548766  |
| <i>HSPB1</i>    | 0.839812465  |
| <i>MAFG</i>     | 0.832517482  |
| <i>DAXX</i>     | 0.757933477  |
| <i>MEF2D</i>    | 0.739331706  |
| <i>TLR5</i>     | 0.729232422  |
| <i>TLR2</i>     | 0.723843162  |
| <i>CCL21</i>    | 0.710800392  |
| <i>RAC1</i>     | 0.703406301  |
| <i>AREG</i>     | 0.687881125  |
| <i>CXCL1</i>    | 0.655032692  |
| <i>CD4</i>      | 0.650741458  |
| <i>RELA</i>     | 0.637369019  |
| <i>CFL1</i>     | 0.617930885  |
| Downregulated   |              |
| <i>OASL</i>     | -4.408160277 |
| <i>CXCL10</i>   | -4.136442755 |
| <i>C1S</i>      | -3.506510094 |
| <i>PTGIR</i>    | -3.30655998  |
| <i>IFIT3</i>    | -3.292122002 |
| <i>AGER</i>     | -3.175492742 |
| <i>CXCL5</i>    | -3.164124162 |
| <i>CCL8</i>     | -3.156239486 |
| <i>IFIT1</i>    | -3.030267348 |
| <i>MX1</i>      | -2.996931999 |
| <i>CCL2</i>     | -2.96239435  |
| <i>PTGER2</i>   | -2.942304023 |
| <i>CSF1</i>     | -2.900074092 |
| <i>CCL13</i>    | -2.842854299 |
| <i>CCL23</i>    | -2.785297352 |
| <i>PTGS2</i>    | -2.485993629 |
| <i>TRADD</i>    | -2.44295147  |
| <i>IFIT2</i>    | -2.175390748 |
| <i>DEFA1</i>    | -2.162019224 |
| <i>CXCL6</i>    | -2.112661844 |

|                 |              |
|-----------------|--------------|
| <i>GRB2</i>     | -2.085292422 |
| <i>MAP2K4</i>   | -2.033403888 |
| <i>PLA2G4A</i>  | -2.022961449 |
| <i>CCR7</i>     | -1.975461962 |
| <i>C4A</i>      | -1.77929554  |
| <i>TRAF2</i>    | -1.742686734 |
| <i>OXER1</i>    | -1.65951614  |
| <i>MAFK</i>     | -1.49331069  |
| <i>TCF4</i>     | -1.452849745 |
| <i>IL1A</i>     | -1.445212836 |
| <i>TNF</i>      | -1.433492677 |
| <i>CCL4</i>     | -1.379946591 |
| <i>BCL2L1</i>   | -1.369081025 |
| <i>BIRC2</i>    | -1.363869271 |
| <i>CCL17</i>    | -1.362721544 |
| <i>RIPK1</i>    | -1.289955882 |
| <i>HRAS</i>     | -1.191350109 |
| <i>SHC1</i>     | -1.089279385 |
| <i>STAT1</i>    | -1.084944227 |
| <i>TNFAIP3</i>  | -1.047367283 |
| <i>PPP1R12B</i> | -1.033699962 |
| <i>MAX</i>      | -0.966200409 |
| <i>IL12B</i>    | -0.932718828 |
| <i>CCR1</i>     | -0.901525584 |
| <i>TGFB1</i>    | -0.887321389 |
| <i>TREM2</i>    | -0.883598153 |
| <i>CCL3</i>     | -0.873193115 |
| <i>CXCL3</i>    | -0.843755424 |
| <i>TWIST2</i>   | -0.830382558 |
| <i>HMGB1</i>    | -0.808826214 |
| <i>IRF7</i>     | -0.793069876 |
| <i>CREB1</i>    | -0.765847083 |
| <i>IL1R1</i>    | -0.744521002 |
| <i>MAP3K5</i>   | -0.735381496 |
| <i>CCL19</i>    | -0.726045691 |
| <i>RAPGEF2</i>  | -0.710950932 |
| <i>MYD88</i>    | -0.696538117 |
| <i>FXYP2</i>    | -0.680591194 |
| <i>C3AR1</i>    | -0.673336189 |

|                 |              |
|-----------------|--------------|
| <i>IL18</i>     | -0.631318416 |
| <i>CD86</i>     | -0.608851128 |
| <i>MAPKAPK2</i> | -0.601598776 |
| <i>ATF2</i>     | -0.595549675 |

**Table S5.** Fold changes among differentially expressed genes for the 300 µg/mL *M. vaccae* NCTC 11659/250 ng/mL LPS vs 300 *M. vaccae* NCTC 11659/RPMI 1640 comparison in *Experiment 1* using the NanoString platform.

| Gene symbol     | log2FoldChange |
|-----------------|----------------|
| Upregulated     |                |
| <i>TGFB2</i>    | 6.120263788    |
| <i>CXCR2</i>    | 6.107778378    |
| <i>RPS6KA5</i>  | 5.703338822    |
| <i>NOD1</i>     | 5.661803223    |
| <i>TNFSF14</i>  | 5.194677406    |
| <i>MAP2K6</i>   | 4.949104517    |
| <i>MX1</i>      | 4.49605084     |
| <i>LTB4R2</i>   | 4.41108765     |
| <i>MX2</i>      | 4.329610799    |
| <i>C5</i>       | 4.239846908    |
| <i>IL23A</i>    | 4.128700691    |
| <i>OAS2</i>     | 4.004979806    |
| <i>IL1RAP</i>   | 3.96485466     |
| <i>MAPK8</i>    | 3.763426708    |
| <i>TLR5</i>     | 3.537750899    |
| <i>CCL5</i>     | 3.313953309    |
| <i>LTB4R</i>    | 3.280034883    |
| <i>CCL22</i>    | 2.633775154    |
| <i>IL8</i>      | 2.501388071    |
| <i>STAT1</i>    | 2.467503503    |
| <i>IL1B</i>     | 2.436145023    |
| <i>CYSLTR1</i>  | 2.25625754     |
| <i>MAPK1</i>    | 2.114514958    |
| <i>C1QA</i>     | 2.043388814    |
| <i>PLA2G4A</i>  | 1.964062564    |
| <i>NOD2</i>     | 1.883765917    |
| <i>CXCL2</i>    | 1.843106528    |
| <i>CCL3</i>     | 1.793785343    |
| <i>RELB</i>     | 1.782622255    |
| <i>MYC</i>      | 1.768909827    |
| <i>PPP1R12B</i> | 1.762143979    |
| <i>RIPK2</i>    | 1.747898262    |
| <i>PDGFA</i>    | 1.737370787    |
| <i>TLR6</i>     | 1.73506275     |

|               |              |
|---------------|--------------|
| <i>TLR4</i>   | 1.725919297  |
| <i>IFI44</i>  | 1.697092244  |
| <i>CXCL3</i>  | 1.651744662  |
| <i>MAP2K1</i> | 1.572268911  |
| <i>STAT2</i>  | 1.493993137  |
| <i>TLR8</i>   | 1.485784135  |
| <i>MYD88</i>  | 1.434305325  |
| <i>IFIT1</i>  | 1.411289703  |
| <i>IL1RN</i>  | 1.396065573  |
| <i>PRKCA</i>  | 1.296344054  |
| <i>IL10RB</i> | 1.260366684  |
| <i>C1QB</i>   | 1.1416171    |
| <i>OXER1</i>  | 1.130713266  |
| <i>NFKB1</i>  | 1.094804731  |
| <i>CCL24</i>  | 1.076429621  |
| <i>LTB</i>    | 1.042537016  |
| <i>CXCL1</i>  | 1.040910047  |
| <i>PTK2</i>   | 0.995532526  |
| <i>IRF3</i>   | 0.981334578  |
| <i>ELK1</i>   | 0.971027671  |
| <i>RAF1</i>   | 0.964761299  |
| <i>AGER</i>   | 0.949529562  |
| <i>CEBPB</i>  | 0.92649671   |
| <i>TLR1</i>   | 0.832113446  |
| <i>CXCR4</i>  | 0.779813437  |
| <i>CCL20</i>  | 0.778011098  |
| <i>NFATC3</i> | 0.723543359  |
| <i>MRC1</i>   | 0.6933714    |
| <i>TLR2</i>   | 0.685572337  |
| <i>IL23R</i>  | 0.643337688  |
| <i>CD86</i>   | 0.596446442  |
| Downregulated |              |
| <i>CCL8</i>   | -7.426654069 |
| <i>CCL13</i>  | -7.257435442 |
| <i>C1S</i>    | -6.581855389 |
| <i>CXCL5</i>  | -5.69820227  |
| <i>OASL</i>   | -4.721822945 |
| <i>PTGIR</i>  | -4.410253909 |
| <i>IFIT3</i>  | -4.340959421 |



|                 |              |
|-----------------|--------------|
| <i>TRADD</i>    | -4.082988306 |
| <i>TREM2</i>    | -4.052520025 |
| <i>GRB2</i>     | -3.981070039 |
| <i>CFB</i>      | -3.97321765  |
| <i>RAPGEF2</i>  | -3.450670393 |
| <i>PTGER2</i>   | -3.434476009 |
| <i>DEFA1</i>    | -3.100752779 |
| <i>IFIT2</i>    | -3.091121102 |
| <i>IL6R</i>     | -2.936137512 |
| <i>KEAP1</i>    | -2.731145869 |
| <i>TRAF2</i>    | -2.658961131 |
| <i>CSF1</i>     | -2.655672587 |
| <i>TNF</i>      | -2.364319991 |
| <i>BIRC2</i>    | -2.295225331 |
| <i>TGFBR1</i>   | -2.27154998  |
| <i>CXCL10</i>   | -2.220542155 |
| <i>PTGS1</i>    | -2.166346112 |
| <i>MAP3K5</i>   | -2.159156417 |
| <i>IRF1</i>     | -2.033382401 |
| <i>RIPK1</i>    | -1.984652105 |
| <i>IRF7</i>     | -1.983841175 |
| <i>MAFF</i>     | -1.925089041 |
| <i>HLA-DRB1</i> | -1.897946816 |
| <i>BCL2L1</i>   | -1.861726507 |
| <i>CREB1</i>    | -1.849988742 |
| <i>CCR1</i>     | -1.831054792 |
| <i>C4A</i>      | -1.77929554  |
| <i>IL15</i>     | -1.778732694 |
| <i>LIMK1</i>    | -1.776971678 |
| <i>C3</i>       | -1.763476573 |
| <i>IL1R1</i>    | -1.745736897 |
| <i>IL18</i>     | -1.684287109 |
| <i>CD4</i>      | -1.640117366 |
| <i>HMGB1</i>    | -1.542046711 |
| <i>IL10</i>     | -1.487204801 |
| <i>CCL23</i>    | -1.468594605 |
| <i>IL1A</i>     | -1.445212836 |
| <i>MAFK</i>     | -1.426007454 |
| <i>ITGB2</i>    | -1.425378067 |

|                 |              |
|-----------------|--------------|
| <i>PRKCB</i>    | -1.374451801 |
| <i>CCL17</i>    | -1.362721544 |
| <i>NFE2L2</i>   | -1.317708723 |
| <i>HSPB1</i>    | -1.312101151 |
| <i>SHC1</i>     | -1.285676915 |
| <i>MAX</i>      | -1.275479399 |
| <i>MAP2K4</i>   | -1.247011546 |
| <i>HMGB2</i>    | -1.230519584 |
| <i>GNAS</i>     | -1.21140752  |
| <i>ALOX5</i>    | -1.177598501 |
| <i>CD163</i>    | -1.156216443 |
| <i>CSF3</i>     | -1.154071013 |
| <i>TGFB1</i>    | -1.13997757  |
| <i>C3AR1</i>    | -1.107626089 |
| <i>IRF5</i>     | -1.086050172 |
| <i>RAC1</i>     | -1.050950041 |
| <i>MAPKAPK2</i> | -1.012671347 |
| <i>MEF2C</i>    | -1.006319544 |
| <i>GNAQ</i>     | -0.995017327 |
| <i>LY96</i>     | -0.951152454 |
| <i>IL12B</i>    | -0.932718828 |
| <i>PTGER4</i>   | -0.919174883 |
| <i>CCL19</i>    | -0.898000527 |
| <i>IL11</i>     | -0.896658724 |
| <i>MAPK14</i>   | -0.876669289 |
| <i>MAPK3</i>    | -0.869578113 |
| <i>FXRD2</i>    | -0.848908775 |
| <i>MAP3K7</i>   | -0.831733933 |
| <i>TWIST2</i>   | -0.830382558 |
| <i>CCL2</i>     | -0.825029917 |
| <i>RELA</i>     | -0.804637744 |
| <i>CFD</i>      | -0.783074509 |
| <i>MMP9</i>     | -0.763854742 |
| <i>HRAS</i>     | -0.684084464 |
| <i>ATF2</i>     | -0.683882651 |
| <i>BCL6</i>     | -0.606589293 |
| <i>HDAC4</i>    | -0.605771718 |

**Table S6.** Fold changes among differentially expressed genes for the 30 µg/mL *M. vaccae* NCTC 11659/RPMI 1640 vs. BBS/RPMI 1640 comparison in *Experiment 1* using the NanoString platform.

| Gene symbol     | log2FoldChange |
|-----------------|----------------|
| Upregulated     |                |
| <i>CCL8</i>     | 3.65093055     |
| <i>CCL13</i>    | 3.149080734    |
| <i>CCR7</i>     | 3.042399552    |
| <i>IFIT3</i>    | 2.878938362    |
| <i>MMP9</i>     | 2.597995121    |
| <i>C1S</i>      | 2.485042688    |
| <i>CXCL10</i>   | 2.453873064    |
| <i>CXCL5</i>    | 2.400323163    |
| <i>CCL22</i>    | 2.334238711    |
| <i>ELK1</i>     | 2.299251109    |
| <i>TRADD</i>    | 2.036206871    |
| <i>CFB</i>      | 2.00679544     |
| <i>IL8</i>      | 1.533885836    |
| <i>PTGER2</i>   | 1.46347844     |
| <i>HLA-DRB1</i> | 1.311637521    |
| <i>IL15</i>     | 1.239788697    |
| <i>ITGB2</i>    | 1.215136222    |
| <i>IFIT2</i>    | 1.175723117    |
| <i>MRC1</i>     | 1.123893462    |
| <i>IL11</i>     | 1.110389565    |
| <i>CCL5</i>     | 1.079814026    |
| <i>HMGNI</i>    | 1.078072869    |
| <i>MAP3K7</i>   | 1.060341309    |
| <i>PTGIR</i>    | 1.052475684    |
| <i>NOD2</i>     | 0.960361151    |
| <i>CD4</i>      | 0.957328779    |
| <i>NLRP3</i>    | 0.933533412    |
| <i>IL23A</i>    | 0.933022695    |
| <i>RAF1</i>     | 0.912271608    |
| <i>CXCL1</i>    | 0.87168337     |
| <i>RELB</i>     | 0.865295586    |
| <i>C1QB</i>     | 0.843103513    |
| <i>OASL</i>     | 0.840573093    |
| <i>CSF3</i>     | 0.832248568    |

|                 |              |
|-----------------|--------------|
| <i>DEFA1</i>    | 0.827830768  |
| <i>AREG</i>     | 0.78106527   |
| <i>CCL24</i>    | 0.760030653  |
| <i>HSPB1</i>    | 0.752750259  |
| <i>SMAD7</i>    | 0.750823952  |
| <i>CFL1</i>     | 0.703655717  |
| <i>TREM2</i>    | 0.699869662  |
| <i>CCR1</i>     | 0.685080707  |
| <i>RHOA</i>     | 0.672560739  |
| <i>MEF2D</i>    | 0.670231674  |
| <i>CXCL2</i>    | 0.659513981  |
| Downregulated   |              |
| <i>AGER</i>     | -5.482472487 |
| <i>OXER1</i>    | -3.18713     |
| <i>TLR7</i>     | -2.608692744 |
| <i>TNFSF14</i>  | -2.447947778 |
| <i>C5</i>       | -2.337656428 |
| <i>FXVD2</i>    | -2.046789727 |
| <i>PPP1R12B</i> | -1.874183353 |
| <i>PTGS1</i>    | -1.644031939 |
| <i>RPS6KA5</i>  | -1.501620465 |
| <i>BIRC2</i>    | -1.493633999 |
| <i>PDGFA</i>    | -1.450070059 |
| <i>LTB4R2</i>   | -1.343424763 |
| <i>GRB2</i>     | -1.239103301 |
| <i>PTGS2</i>    | -1.18047607  |
| <i>IFIT1</i>    | -1.070359504 |
| <i>CEBPB</i>    | -1.059009382 |
| <i>LTB4R</i>    | -1.03310146  |
| <i>TGFB2</i>    | -1.004050778 |
| <i>LIMK1</i>    | -1.001134201 |
| <i>PRKCA</i>    | -0.999303406 |
| <i>IL23R</i>    | -0.957511838 |
| <i>CCR2</i>     | -0.933749827 |
| <i>FOS</i>      | -0.909354375 |
| <i>LTB</i>      | -0.89069282  |
| <i>HMGB1</i>    | -0.729197953 |
| <i>TYROBP</i>   | -0.634158315 |
| <i>PLA2G4A</i>  | -0.623782522 |

|              |              |
|--------------|--------------|
| <i>GNAS</i>  | -0.617431352 |
| <i>NOD1</i>  | -0.608089594 |
| <i>PLCB1</i> | -0.590900884 |

**Table S7.** Fold changes among differentially expressed genes for the 30 µg/mL *M. vaccae* NCTC 11659/250 ng/mL LPS vs. BBS/250 ng/mL LPS comparison in *Experiment 1* using the NanoString platform.

| Gene symbol     | log2FoldChange |
|-----------------|----------------|
| Upregulated     |                |
| <i>TLR5</i>     | 2.710084931    |
| <i>C1QA</i>     | 2.684485845    |
| <i>LTB4R2</i>   | 2.645940505    |
| <i>CXCR2</i>    | 2.62672939     |
| <i>MAP2K6</i>   | 2.453411249    |
| <i>CCR2</i>     | 2.261744964    |
| <i>NOD1</i>     | 1.963723256    |
| <i>FXRD2</i>    | 1.582344947    |
| <i>CCL24</i>    | 1.563842348    |
| <i>MRC1</i>     | 1.537153018    |
| <i>TGFB2</i>    | 1.50602263     |
| <i>C5</i>       | 1.461106615    |
| <i>PRKCA</i>    | 1.367938667    |
| <i>MAPK8</i>    | 1.366182804    |
| <i>TNFSF14</i>  | 1.34746473     |
| <i>HRAS</i>     | 1.219384699    |
| <i>LTB4R</i>    | 1.187643573    |
| <i>RPS6KA5</i>  | 1.100961863    |
| <i>MAP3K5</i>   | 1.033791185    |
| <i>CCL23</i>    | 1.009685291    |
| <i>AREG</i>     | 0.918382435    |
| <i>PPP1R12B</i> | 0.734176045    |
| <i>MAP2K4</i>   | 0.703026041    |
| <i>NOD2</i>     | 0.702369056    |
| <i>CCL21</i>    | 0.667698549    |
| <i>PTGS2</i>    | 0.624099384    |
| Downregulated   |                |
| <i>OASL</i>     | -2.784240439   |
| <i>IFIT1</i>    | -2.587393775   |
| <i>MX1</i>      | -2.33527973    |
| <i>CXCL10</i>   | -2.175247988   |
| <i>IFIT3</i>    | -2.05367924    |
| <i>CCR7</i>     | -1.728967684   |
| <i>CXCL5</i>    | -1.273190751   |

|                |              |
|----------------|--------------|
| <i>CXCL6</i>   | -1.09333728  |
| <i>CCL2</i>    | -1.093121135 |
| <i>CCL22</i>   | -0.989892313 |
| <i>STAT1</i>   | -0.965089457 |
| <i>CCL19</i>   | -0.906075234 |
| <i>IL1B</i>    | -0.853608949 |
| <i>AGER</i>    | -0.825973172 |
| <i>CCL20</i>   | -0.799298758 |
| <i>DEFA1</i>   | -0.73095191  |
| <i>TNFAIP3</i> | -0.721129743 |
| <i>CCL4</i>    | -0.714245346 |
| <i>PTGER2</i>  | -0.71408325  |
| <i>PTGIR</i>   | -0.687632091 |
| <i>C1S</i>     | -0.672161381 |
| <i>CCL8</i>    | -0.59167732  |

**Table S8.** Fold changes among differentially expressed genes for the 30 µg/mL *M. vaccae* NCTC 11659/250 ng/mL LPS vs. 30 µg/mL *M. vaccae* NCTC 11659/RPMI 1640 comparison in *Experiment 1* using the NanoString platform.

| Gene symbol     | log2FoldChange |
|-----------------|----------------|
| Upregulated     |                |
| <i>LTB4R2</i>   | 4.23281562     |
| <i>CXCR2</i>    | 4.031971691    |
| <i>AGER</i>     | 4.016773163    |
| <i>OXER1</i>    | 4.009490272    |
| <i>FXYP2</i>    | 4.008614412    |
| <i>C1QA</i>     | 3.942186977    |
| <i>NOD1</i>     | 3.811969852    |
| <i>RPS6KA5</i>  | 3.79423271     |
| <i>TGFB2</i>    | 3.736054254    |
| <i>TNFSF14</i>  | 3.674022864    |
| <i>MAP2K6</i>   | 3.55930419     |
| <i>C5</i>       | 3.457229883    |
| <i>TLR5</i>     | 3.456453149    |
| <i>CCR2</i>     | 2.944770051    |
| <i>IL8</i>      | 2.521621244    |
| <i>LTB</i>      | 2.41142563     |
| <i>LTB4R</i>    | 2.364887827    |
| <i>PRKCA</i>    | 2.297443796    |
| <i>PPP1R12B</i> | 2.172234875    |
| <i>PTGS2</i>    | 2.134592857    |
| <i>OAS2</i>     | 2.125492439    |
| <i>MX2</i>      | 2.111362529    |
| <i>IL1B</i>     | 2.063350601    |
| <i>STAT1</i>    | 1.999518899    |
| <i>CCL5</i>     | 1.995405724    |
| <i>TLR7</i>     | 1.929568056    |
| <i>CXCL3</i>    | 1.824985615    |
| <i>CEBPB</i>    | 1.699492904    |
| <i>MAP3K5</i>   | 1.638747124    |
| <i>MAPK8</i>    | 1.593596142    |
| <i>CCL23</i>    | 1.497632409    |
| <i>MAP2K4</i>   | 1.448478003    |
| <i>STAT2</i>    | 1.375884108    |
| <i>CXCL2</i>    | 1.361997517    |



|               |              |
|---------------|--------------|
| <i>PDGFA</i>  | 1.324831159  |
| <i>CCL4</i>   | 1.283845327  |
| <i>CCL24</i>  | 1.138758278  |
| <i>IFIT1</i>  | 1.089278947  |
| <i>CXCL1</i>  | 1.007185964  |
| <i>CCL2</i>   | 0.998759158  |
| <i>IL23R</i>  | 0.957511838  |
| <i>IRF3</i>   | 0.955314915  |
| <i>MRC1</i>   | 0.880993491  |
| <i>CD40</i>   | 0.839182724  |
| <i>IFI44</i>  | 0.831107212  |
| <i>RIPK2</i>  | 0.810193975  |
| <i>GRB2</i>   | 0.735334921  |
| <i>TLR6</i>   | 0.71876881   |
| <i>HRAS</i>   | 0.679538836  |
| <i>CCL3</i>   | 0.662215323  |
| <i>MX1</i>    | 0.65700868   |
| <i>IL1RN</i>  | 0.604535138  |
| <i>TLR8</i>   | 0.603566607  |
| <i>NFKB1</i>  | 0.592622323  |
| <i>PLCB1</i>  | 0.590900884  |
| Downregulated |              |
| <i>CCL13</i>  | -3.963713914 |
| <i>CCL8</i>   | -3.957226863 |
| <i>CXCL5</i>  | -3.510723636 |
| <i>C1S</i>    | -3.310503539 |
| <i>IFIT3</i>  | -3.03052879  |
| <i>CCR7</i>   | -2.538970211 |
| <i>PTGER2</i> | -2.457891183 |
| <i>TREM2</i>  | -2.177287723 |
| <i>ELK1</i>   | -1.92381998  |
| <i>CFB</i>    | -1.888835541 |
| <i>CCL22</i>  | -1.887341581 |
| <i>IL1R1</i>  | -1.870613946 |
| <i>PTGIR</i>  | -1.836531367 |
| <i>OASL</i>   | -1.821113402 |
| <i>IL15</i>   | -1.766736742 |
| <i>MEF2D</i>  | -1.706026107 |
| <i>HMGNI</i>  | -1.693181947 |

|                 |              |
|-----------------|--------------|
| <i>CXCL10</i>   | -1.681440832 |
| <i>HLA-DRB1</i> | -1.611129159 |
| <i>DEFA1</i>    | -1.608033126 |
| <i>IL11</i>     | -1.587978562 |
| <i>ITGB2</i>    | -1.565214359 |
| <i>CD4</i>      | -1.544090696 |
| <i>HSPB1</i>    | -1.395500204 |
| <i>MAP3K7</i>   | -1.37686946  |
| <i>TRADD</i>    | -1.293570771 |
| <i>MAPK14</i>   | -1.210057281 |
| <i>NLRP3</i>    | -1.202199016 |
| <i>CSF3</i>     | -1.197675934 |
| <i>ROCK2</i>    | -1.177821221 |
| <i>CFL1</i>     | -1.17165777  |
| <i>MAX</i>      | -1.033450101 |
| <i>IRF1</i>     | -0.971790096 |
| <i>MAPKAPK2</i> | -0.962311663 |
| <i>NR3C1</i>    | -0.959382127 |
| <i>TGFB1</i>    | -0.940185258 |
| <i>CCR1</i>     | -0.92268522  |
| <i>C1QB</i>     | -0.843103513 |
| <i>STAT3</i>    | -0.832116767 |
| <i>GNAS</i>     | -0.791271867 |
| <i>GNAQ</i>     | -0.77341131  |
| <i>LY96</i>     | -0.771267718 |
| <i>RHOA</i>     | -0.76971607  |
| <i>RAF1</i>     | -0.769392504 |
| <i>BCL6</i>     | -0.767311415 |
| <i>MMP9</i>     | -0.762833124 |
| <i>CREB1</i>    | -0.73924081  |
| <i>HMGB2</i>    | -0.709822123 |
| <i>SMAD7</i>    | -0.676374314 |
| <i>TRAF2</i>    | -0.6481829   |
| <i>TNF</i>      | -0.62012128  |

**Table S9.** Sample sizes (*n*) for *Experiment 2* consisting of real time RT-PCR experiments examining the effect of LPS and *M. vaccae* NCTC 11659 on gene expression. Sample size represents 1 experimental replicate. Data came from two independent experiments (*N* = 2).

| Figure | Gene         | LPS treatment | Bacterial Treatment                   | Sample Size ( <i>n</i> ) |
|--------|--------------|---------------|---------------------------------------|--------------------------|
| S13    | <i>IL12A</i> | 0 ng/mL       | BBS                                   | 2                        |
|        |              |               | 10 µg/mL <i>M. vaccae</i> NCTC 11659  | 1                        |
|        |              |               | 30 µg/mL <i>M. vaccae</i> NCTC 11659  | 4                        |
|        |              |               | 100 µg/mL <i>M. vaccae</i> NCTC 11659 | 4                        |
|        |              |               | 300 µg/mL <i>M. vaccae</i> NCTC 11659 | 2                        |
|        |              | 0.5 ng/mL     | BBS                                   | 7                        |
|        |              |               | 10 µg/mL <i>M. vaccae</i> NCTC 11659  | 8                        |
|        |              |               | 30 µg/mL <i>M. vaccae</i> NCTC 11659  | 8                        |
|        |              |               | 100 µg/mL <i>M. vaccae</i> NCTC 11659 | 8                        |
|        |              |               | 300 µg/mL <i>M. vaccae</i> NCTC 11659 | 8                        |
|        |              | 2.5 ng/mL     | BBS                                   | 7                        |
|        |              |               | 10 µg/mL <i>M. vaccae</i> NCTC 11659  | 7                        |
|        |              |               | 30 µg/mL <i>M. vaccae</i> NCTC 11659  | 8                        |
|        |              |               | 100 µg/mL <i>M. vaccae</i> NCTC 11659 | 8                        |
|        |              |               | 300 µg/mL <i>M. vaccae</i> NCTC 11659 | 7                        |
|        |              | 250 ng/mL     | BBS                                   | 4                        |
|        |              |               | 10 µg/mL <i>M. vaccae</i> NCTC 11659  | 8                        |
|        |              |               | 30 µg/mL <i>M. vaccae</i> NCTC 11659  | 7                        |
|        |              |               | 100 µg/mL <i>M. vaccae</i> NCTC 11659 | 8                        |
|        |              |               | 300 µg/mL <i>M. vaccae</i> NCTC 11659 | 7                        |
|        | <i>IL12B</i> | 0 ng/mL       | BBS                                   | 3                        |
|        |              |               | 10 µg/mL <i>M. vaccae</i> NCTC 11659  | 3                        |
|        |              |               | 30 µg/mL <i>M. vaccae</i> NCTC 11659  | 5                        |
|        |              |               | 100 µg/mL <i>M. vaccae</i> NCTC 11659 | 8                        |
|        |              |               | 300 µg/mL <i>M. vaccae</i> NCTC 11659 | 5                        |
|        |              | 0.5 ng/mL     | BBS                                   | 8                        |
|        |              |               | 10 µg/mL <i>M. vaccae</i> NCTC 11659  | 8                        |
|        |              |               | 30 µg/mL <i>M. vaccae</i> NCTC 11659  | 8                        |
|        |              |               | 100 µg/mL <i>M. vaccae</i> NCTC 11659 | 8                        |
|        |              |               | 300 µg/mL <i>M. vaccae</i> NCTC 11659 | 8                        |
|        |              | 2.5 ng/mL     | BBS                                   | 7                        |
|        |              |               | 10 µg/mL <i>M. vaccae</i> NCTC 11659  | 8                        |
|        |              |               | 30 µg/mL <i>M. vaccae</i> NCTC 11659  | 8                        |
|        |              |               | 100 µg/mL <i>M. vaccae</i> NCTC 11659 | 8                        |
|        |              |               | 300 µg/mL <i>M. vaccae</i> NCTC 11659 | 8                        |

|     |              |           |                                       |   |
|-----|--------------|-----------|---------------------------------------|---|
|     |              | 250 ng/mL | BBS                                   | 8 |
|     |              |           | 10 µg/mL <i>M. vaccae</i> NCTC 11659  | 8 |
|     |              |           | 30 µg/mL <i>M. vaccae</i> NCTC 11659  | 8 |
|     |              |           | 100 µg/mL <i>M. vaccae</i> NCTC 11659 | 8 |
|     |              |           | 300 µg/mL <i>M. vaccae</i> NCTC 11659 | 8 |
|     | <i>IL23A</i> | 0 ng/mL   | BBS                                   | 8 |
|     |              |           | 10 µg/mL <i>M. vaccae</i> NCTC 11659  | 8 |
|     |              |           | 30 µg/mL <i>M. vaccae</i> NCTC 11659  | 8 |
|     |              |           | 100 µg/mL <i>M. vaccae</i> NCTC 11659 | 8 |
|     |              |           | 300 µg/mL <i>M. vaccae</i> NCTC 11659 | 8 |
|     |              | 0.5 ng/mL | BBS                                   | 8 |
|     |              |           | 10 µg/mL <i>M. vaccae</i> NCTC 11659  | 8 |
|     |              |           | 30 µg/mL <i>M. vaccae</i> NCTC 11659  | 8 |
|     |              |           | 100 µg/mL <i>M. vaccae</i> NCTC 11659 | 8 |
|     |              |           | 300 µg/mL <i>M. vaccae</i> NCTC 11659 | 8 |
|     |              | 2.5 ng/mL | BBS                                   | 8 |
|     |              |           | 10 µg/mL <i>M. vaccae</i> NCTC 11659  | 8 |
|     |              |           | 30 µg/mL <i>M. vaccae</i> NCTC 11659  | 8 |
|     |              |           | 100 µg/mL <i>M. vaccae</i> NCTC 11659 | 8 |
|     |              |           | 300 µg/mL <i>M. vaccae</i> NCTC 11659 | 8 |
|     |              | 250 ng/mL | BBS                                   | 8 |
|     |              |           | 10 µg/mL <i>M. vaccae</i> NCTC 11659  | 8 |
|     |              |           | 30 µg/mL <i>M. vaccae</i> NCTC 11659  | 8 |
|     |              |           | 100 µg/mL <i>M. vaccae</i> NCTC 11659 | 8 |
|     |              |           | 300 µg/mL <i>M. vaccae</i> NCTC 11659 | 8 |
| S14 | <i>IL10</i>  | 0 ng/mL   | BBS                                   | 8 |
|     |              |           | 10 µg/mL <i>M. vaccae</i> NCTC 11659  | 7 |
|     |              |           | 30 µg/mL <i>M. vaccae</i> NCTC 11659  | 8 |
|     |              |           | 100 µg/mL <i>M. vaccae</i> NCTC 11659 | 8 |
|     |              |           | 300 µg/mL <i>M. vaccae</i> NCTC 11659 | 8 |
|     |              | 0.5 ng/mL | BBS                                   | 8 |
|     |              |           | 10 µg/mL <i>M. vaccae</i> NCTC 11659  | 8 |
|     |              |           | 30 µg/mL <i>M. vaccae</i> NCTC 11659  | 8 |
|     |              |           | 100 µg/mL <i>M. vaccae</i> NCTC 11659 | 8 |
|     |              |           | 300 µg/mL <i>M. vaccae</i> NCTC 11659 | 8 |
|     |              | 2.5 ng/mL | BBS                                   | 8 |
|     |              |           | 10 µg/mL <i>M. vaccae</i> NCTC 11659  | 8 |
|     |              |           | 30 µg/mL <i>M. vaccae</i> NCTC 11659  | 8 |
|     |              |           | 100 µg/mL <i>M. vaccae</i> NCTC 11659 | 8 |

|   |                                       |            |                                       |                                       |   |
|---|---------------------------------------|------------|---------------------------------------|---------------------------------------|---|
|   |                                       | 250 ng/mL  | 300 µg/mL <i>M. vaccae</i> NCTC 11659 | 8                                     |   |
|   |                                       |            | BBS                                   | 8                                     |   |
|   |                                       |            | 10 µg/mL <i>M. vaccae</i> NCTC 11659  | 8                                     |   |
|   |                                       |            | 30 µg/mL <i>M. vaccae</i> NCTC 11659  | 8                                     |   |
|   |                                       |            | 100 µg/mL <i>M. vaccae</i> NCTC 11659 | 8                                     |   |
|   |                                       |            | 300 µg/mL <i>M. vaccae</i> NCTC 11659 | 8                                     |   |
|   | TGFB                                  | 0 ng/mL    | BBS                                   | 8                                     |   |
|   |                                       |            | 10 µg/mL <i>M. vaccae</i> NCTC 11659  | 7                                     |   |
|   |                                       |            | 30 µg/mL <i>M. vaccae</i> NCTC 11659  | 8                                     |   |
|   |                                       |            | 100 µg/mL <i>M. vaccae</i> NCTC 11659 | 8                                     |   |
|   |                                       |            | 300 µg/mL <i>M. vaccae</i> NCTC 11659 | 8                                     |   |
|   |                                       | 0.5 ng/mL  | BBS                                   | 8                                     |   |
|   |                                       |            | 10 µg/mL <i>M. vaccae</i> NCTC 11659  | 8                                     |   |
|   |                                       |            | 30 µg/mL <i>M. vaccae</i> NCTC 11659  | 8                                     |   |
|   |                                       |            | 100 µg/mL <i>M. vaccae</i> NCTC 11659 | 8                                     |   |
|   |                                       |            | 300 µg/mL <i>M. vaccae</i> NCTC 11659 | 8                                     |   |
|   |                                       | 2.5 ng/mL  | BBS                                   | 7                                     |   |
|   |                                       |            | 10 µg/mL <i>M. vaccae</i> NCTC 11659  | 8                                     |   |
|   |                                       |            | 30 µg/mL <i>M. vaccae</i> NCTC 11659  | 7                                     |   |
|   |                                       |            | 100 µg/mL <i>M. vaccae</i> NCTC 11659 | 8                                     |   |
|   |                                       |            | 300 µg/mL <i>M. vaccae</i> NCTC 11659 | 8                                     |   |
|   |                                       | 250 ng/mL  | BBS                                   | 8                                     |   |
|   |                                       |            | 10 µg/mL <i>M. vaccae</i> NCTC 11659  | 8                                     |   |
|   |                                       |            | 30 µg/mL <i>M. vaccae</i> NCTC 11659  | 8                                     |   |
|   |                                       |            | 100 µg/mL <i>M. vaccae</i> NCTC 11659 | 8                                     |   |
|   |                                       |            | 300 µg/mL <i>M. vaccae</i> NCTC 11659 | 8                                     |   |
| 2 |                                       | IL10:IL12A | 0 ng/mL                               | BBS                                   | 2 |
|   |                                       |            |                                       | 10 µg/mL <i>M. vaccae</i> NCTC 11659  | 1 |
|   |                                       |            |                                       | 30 µg/mL <i>M. vaccae</i> NCTC 11659  | 3 |
|   |                                       |            |                                       | 100 µg/mL <i>M. vaccae</i> NCTC 11659 | 4 |
|   | 300 µg/mL <i>M. vaccae</i> NCTC 11659 |            |                                       | 2                                     |   |
|   | 0.5 ng/mL                             |            | BBS                                   | 7                                     |   |
|   |                                       |            | 10 µg/mL <i>M. vaccae</i> NCTC 11659  | 8                                     |   |
|   |                                       |            | 30 µg/mL <i>M. vaccae</i> NCTC 11659  | 8                                     |   |
|   |                                       |            | 100 µg/mL <i>M. vaccae</i> NCTC 11659 | 8                                     |   |
|   |                                       |            | 300 µg/mL <i>M. vaccae</i> NCTC 11659 | 8                                     |   |
|   | 2.5 ng/mL                             |            | BBS                                   | 7                                     |   |
|   |                                       |            | 10 µg/mL <i>M. vaccae</i> NCTC 11659  | 7                                     |   |
|   |                                       |            | 30 µg/mL <i>M. vaccae</i> NCTC 11659  | 8                                     |   |

|  |                   |           |                                       |   |
|--|-------------------|-----------|---------------------------------------|---|
|  |                   |           | 100 µg/mL <i>M. vaccae</i> NCTC 11659 | 8 |
|  |                   |           | 300 µg/mL <i>M. vaccae</i> NCTC 11659 | 7 |
|  |                   | 250 ng/mL | BBS                                   | 4 |
|  |                   |           | 10 µg/mL <i>M. vaccae</i> NCTC 11659  | 8 |
|  |                   |           | 30 µg/mL <i>M. vaccae</i> NCTC 11659  | 7 |
|  |                   |           | 100 µg/mL <i>M. vaccae</i> NCTC 11659 | 8 |
|  |                   |           | 300 µg/mL <i>M. vaccae</i> NCTC 11659 | 7 |
|  | <i>IL10:IL12B</i> | 0 ng/mL   | BBS                                   | 3 |
|  |                   |           | 10 µg/mL <i>M. vaccae</i> NCTC 11659  | 2 |
|  |                   |           | 30 µg/mL <i>M. vaccae</i> NCTC 11659  | 5 |
|  |                   |           | 100 µg/mL <i>M. vaccae</i> NCTC 11659 | 8 |
|  |                   |           | 300 µg/mL <i>M. vaccae</i> NCTC 11659 | 4 |
|  |                   | 0.5 ng/mL | BBS                                   | 8 |
|  |                   |           | 10 µg/mL <i>M. vaccae</i> NCTC 11659  | 8 |
|  |                   |           | 30 µg/mL <i>M. vaccae</i> NCTC 11659  | 8 |
|  |                   |           | 100 µg/mL <i>M. vaccae</i> NCTC 11659 | 8 |
|  |                   |           | 300 µg/mL <i>M. vaccae</i> NCTC 11659 | 8 |
|  |                   | 2.5 ng/mL | BBS                                   | 8 |
|  |                   |           | 10 µg/mL <i>M. vaccae</i> NCTC 11659  | 8 |
|  |                   |           | 30 µg/mL <i>M. vaccae</i> NCTC 11659  | 8 |
|  |                   |           | 100 µg/mL <i>M. vaccae</i> NCTC 11659 | 8 |
|  |                   |           | 300 µg/mL <i>M. vaccae</i> NCTC 11659 | 7 |
|  |                   | 250 ng/mL | BBS                                   | 7 |
|  |                   |           | 10 µg/mL <i>M. vaccae</i> NCTC 11659  | 8 |
|  |                   |           | 30 µg/mL <i>M. vaccae</i> NCTC 11659  | 8 |
|  |                   |           | 100 µg/mL <i>M. vaccae</i> NCTC 11659 | 8 |
|  |                   |           | 300 µg/mL <i>M. vaccae</i> NCTC 11659 | 8 |
|  | <i>IL10:IL23A</i> | 0 ng/mL   | BBS                                   | 8 |
|  |                   |           | 10 µg/mL <i>M. vaccae</i> NCTC 11659  | 7 |
|  |                   |           | 30 µg/mL <i>M. vaccae</i> NCTC 11659  | 8 |
|  |                   |           | 100 µg/mL <i>M. vaccae</i> NCTC 11659 | 8 |
|  |                   |           | 300 µg/mL <i>M. vaccae</i> NCTC 11659 | 8 |
|  |                   | 0.5 ng/mL | BBS                                   | 8 |
|  |                   |           | 10 µg/mL <i>M. vaccae</i> NCTC 11659  | 8 |
|  |                   |           | 30 µg/mL <i>M. vaccae</i> NCTC 11659  | 8 |
|  |                   |           | 100 µg/mL <i>M. vaccae</i> NCTC 11659 | 8 |
|  |                   |           | 300 µg/mL <i>M. vaccae</i> NCTC 11659 | 8 |
|  |                   | 2.5 ng/mL | BBS                                   | 8 |
|  |                   |           | 10 µg/mL <i>M. vaccae</i> NCTC 11659  | 8 |

|     |            |           |                                       |   |
|-----|------------|-----------|---------------------------------------|---|
| S15 | TGFB:IL12A |           | 30 µg/mL <i>M. vaccae</i> NCTC 11659  | 8 |
|     |            |           | 100 µg/mL <i>M. vaccae</i> NCTC 11659 | 8 |
|     |            |           | 300 µg/mL <i>M. vaccae</i> NCTC 11659 | 8 |
|     |            | 250 ng/mL | BBS                                   | 8 |
|     |            |           | 10 µg/mL <i>M. vaccae</i> NCTC 11659  | 8 |
|     |            |           | 30 µg/mL <i>M. vaccae</i> NCTC 11659  | 8 |
|     |            |           | 100 µg/mL <i>M. vaccae</i> NCTC 11659 | 8 |
|     |            |           | 300 µg/mL <i>M. vaccae</i> NCTC 11659 | 8 |
|     |            |           |                                       |   |
|     |            |           |                                       |   |
|     | TGFB:IL12B | 0 ng/mL   | BBS                                   | 2 |
|     |            |           | 10 µg/mL <i>M. vaccae</i> NCTC 11659  | 1 |
|     |            |           | 30 µg/mL <i>M. vaccae</i> NCTC 11659  | 4 |
|     |            |           | 100 µg/mL <i>M. vaccae</i> NCTC 11659 | 4 |
|     |            |           | 300 µg/mL <i>M. vaccae</i> NCTC 11659 | 2 |
|     |            | 0.5 ng/mL | BBS                                   | 7 |
|     |            |           | 10 µg/mL <i>M. vaccae</i> NCTC 11659  | 8 |
|     |            |           | 30 µg/mL <i>M. vaccae</i> NCTC 11659  | 8 |
|     |            |           | 100 µg/mL <i>M. vaccae</i> NCTC 11659 | 8 |
|     |            |           | 300 µg/mL <i>M. vaccae</i> NCTC 11659 | 8 |
|     |            | 2.5 ng/mL | BBS                                   | 7 |
|     |            |           | 10 µg/mL <i>M. vaccae</i> NCTC 11659  | 7 |
|     |            |           | 30 µg/mL <i>M. vaccae</i> NCTC 11659  | 7 |
|     |            |           | 100 µg/mL <i>M. vaccae</i> NCTC 11659 | 8 |
|     |            |           | 300 µg/mL <i>M. vaccae</i> NCTC 11659 | 7 |
|     |            | 250 ng/mL | BBS                                   | 4 |
|     |            |           | 10 µg/mL <i>M. vaccae</i> NCTC 11659  | 8 |
|     |            |           | 30 µg/mL <i>M. vaccae</i> NCTC 11659  | 7 |
|     |            |           | 100 µg/mL <i>M. vaccae</i> NCTC 11659 | 8 |
|     |            |           | 300 µg/mL <i>M. vaccae</i> NCTC 11659 | 7 |
|     |            | 0 ng/mL   | BBS                                   | 3 |
|     |            |           | 10 µg/mL <i>M. vaccae</i> NCTC 11659  | 3 |
|     |            |           | 30 µg/mL <i>M. vaccae</i> NCTC 11659  | 5 |
|     |            |           | 100 µg/mL <i>M. vaccae</i> NCTC 11659 | 8 |
|     |            |           | 300 µg/mL <i>M. vaccae</i> NCTC 11659 | 4 |
|     |            | 0.5 ng/mL | BBS                                   | 8 |
|     |            |           | 10 µg/mL <i>M. vaccae</i> NCTC 11659  | 8 |
|     |            |           | 30 µg/mL <i>M. vaccae</i> NCTC 11659  | 8 |
|     |            |           | 100 µg/mL <i>M. vaccae</i> NCTC 11659 | 8 |
|     |            |           | 300 µg/mL <i>M. vaccae</i> NCTC 11659 | 8 |
|     |            | 2.5 ng/mL | BBS                                   | 6 |

|  |                   |           |                                       |   |
|--|-------------------|-----------|---------------------------------------|---|
|  |                   |           | 10 µg/mL <i>M. vaccae</i> NCTC 11659  | 8 |
|  |                   |           | 30 µg/mL <i>M. vaccae</i> NCTC 11659  | 7 |
|  |                   |           | 100 µg/mL <i>M. vaccae</i> NCTC 11659 | 7 |
|  |                   |           | 300 µg/mL <i>M. vaccae</i> NCTC 11659 | 8 |
|  |                   | 250 ng/mL | BBS                                   | 8 |
|  |                   |           | 10 µg/mL <i>M. vaccae</i> NCTC 11659  | 8 |
|  |                   |           | 30 µg/mL <i>M. vaccae</i> NCTC 11659  | 8 |
|  |                   |           | 100 µg/mL <i>M. vaccae</i> NCTC 11659 | 8 |
|  |                   |           | 300 µg/mL <i>M. vaccae</i> NCTC 11659 | 8 |
|  | <i>TGFB:IL23A</i> | 0 ng/mL   | BBS                                   | 8 |
|  |                   |           | 10 µg/mL <i>M. vaccae</i> NCTC 11659  | 8 |
|  |                   |           | 30 µg/mL <i>M. vaccae</i> NCTC 11659  | 8 |
|  |                   |           | 100 µg/mL <i>M. vaccae</i> NCTC 11659 | 8 |
|  |                   |           | 300 µg/mL <i>M. vaccae</i> NCTC 11659 | 8 |
|  |                   | 0.5 ng/mL | BBS                                   | 8 |
|  |                   |           | 10 µg/mL <i>M. vaccae</i> NCTC 11659  | 8 |
|  |                   |           | 30 µg/mL <i>M. vaccae</i> NCTC 11659  | 8 |
|  |                   |           | 100 µg/mL <i>M. vaccae</i> NCTC 11659 | 8 |
|  |                   |           | 300 µg/mL <i>M. vaccae</i> NCTC 11659 | 8 |
|  |                   | 2.5 ng/mL | BBS                                   | 7 |
|  |                   |           | 10 µg/mL <i>M. vaccae</i> NCTC 11659  | 8 |
|  |                   |           | 30 µg/mL <i>M. vaccae</i> NCTC 11659  | 7 |
|  |                   |           | 100 µg/mL <i>M. vaccae</i> NCTC 11659 | 8 |
|  |                   |           | 300 µg/mL <i>M. vaccae</i> NCTC 11659 | 8 |
|  |                   | 250 ng/mL | BBS                                   | 8 |
|  |                   |           | 10 µg/mL <i>M. vaccae</i> NCTC 11659  | 8 |
|  |                   |           | 30 µg/mL <i>M. vaccae</i> NCTC 11659  | 8 |
|  |                   |           | 100 µg/mL <i>M. vaccae</i> NCTC 11659 | 8 |
|  |                   |           | 300 µg/mL <i>M. vaccae</i> NCTC 11659 | 8 |



**Table S10.** Post hoc *p* values not specified in main text.

| Figure | Gene         | LPS condition                                                          | Comparison                                                                                                  | <i>p</i>  |
|--------|--------------|------------------------------------------------------------------------|-------------------------------------------------------------------------------------------------------------|-----------|
| S13    | <i>IL12A</i> | Within 0 ng/mL                                                         | BBS vs. 10 µg/mL <i>M. vaccae</i> NCTC 11659                                                                | > .1      |
|        |              |                                                                        | BBS vs. 30 µg/mL <i>M. vaccae</i> NCTC 11659                                                                | > .1      |
|        |              |                                                                        | BBS vs. 100 µg/mL <i>M. vaccae</i> NCTC 11659                                                               | > .1      |
|        |              |                                                                        | BBS vs. 300 µg/mL <i>M. vaccae</i> NCTC 11659                                                               | > .1      |
|        |              | Within 0.5 ng/mL                                                       | BBS vs. 10 µg/mL <i>M. vaccae</i> NCTC 11659                                                                | > .1      |
|        |              |                                                                        | BBS vs. 30 µg/mL <i>M. vaccae</i> NCTC 11659                                                                | > .1      |
|        |              |                                                                        | BBS vs. 100 µg/mL <i>M. vaccae</i> NCTC 11659                                                               | > .1      |
|        |              |                                                                        | BBS vs. 300 µg/mL <i>M. vaccae</i> NCTC 11659                                                               | > .1      |
|        |              | Within 2.5 ng/mL                                                       | BBS vs. 10 µg/mL <i>M. vaccae</i> NCTC 11659                                                                | > .1      |
|        |              |                                                                        | BBS vs. 30 µg/mL <i>M. vaccae</i> NCTC 11659                                                                | > .1      |
|        |              |                                                                        | BBS vs. 100 µg/mL <i>M. vaccae</i> NCTC 11659                                                               | > .1      |
|        |              |                                                                        | BBS vs. 300 µg/mL <i>M. vaccae</i> NCTC 11659                                                               | 0.0688819 |
|        |              | Within 250 ng/mL                                                       | BBS vs. 10 µg/mL <i>M. vaccae</i> NCTC 11659                                                                | > .1      |
|        |              |                                                                        | BBS vs. 30 µg/mL <i>M. vaccae</i> NCTC 11659                                                                | > .1      |
|        |              |                                                                        | BBS vs. 100 µg/mL <i>M. vaccae</i> NCTC 11659                                                               | > .1      |
|        |              |                                                                        | BBS vs. 300 µg/mL <i>M. vaccae</i> NCTC 11659                                                               | > .1      |
|        |              | Between all LPS conditions within BBS                                  | BBS + LPS vehicle vs. BBS + 0.5 ng/mL LPS                                                                   | > .1      |
|        |              |                                                                        | BBS + LPS vehicle vs. BBS + 2.5 ng/mL LPS                                                                   | > .1      |
|        |              |                                                                        | BBS + LPS vehicle vs. BBS + 250 ng/mL LPS                                                                   | > .1      |
|        |              | Between all LPS conditions within 10 µg/mL <i>M. vaccae</i> NCTC 11659 | 10 µg/mL <i>M. vaccae</i> NCTC 11659 + LPS vehicle vs. 10 µg/mL <i>M. vaccae</i> NCTC 11659 + 0.5 ng/mL LPS | > .1      |

|  |              |                                                                         |                                                                                                               |            |
|--|--------------|-------------------------------------------------------------------------|---------------------------------------------------------------------------------------------------------------|------------|
|  |              |                                                                         | 10 µg/mL <i>M. vaccae</i> NCTC 11659 + LPS vehicle vs. 10 µg/mL <i>M. vaccae</i> NCTC 11659 + 2.5 ng/mL LPS   | > .1       |
|  |              |                                                                         | 10 µg/mL <i>M. vaccae</i> NCTC 11659 + LPS vehicle vs. 10 µg/mL <i>M. vaccae</i> NCTC 11659 + 250 ng/mL LPS   | 0.01458014 |
|  |              | Between all LPS conditions within 30 µg/mL <i>M. vaccae</i> NCTC 11659  | 30 µg/mL <i>M. vaccae</i> NCTC 11659 + LPS vehicle vs. 30 µg/mL <i>M. vaccae</i> NCTC 11659 + 0.5 ng/mL LPS   | > .1       |
|  |              |                                                                         | 30 µg/mL <i>M. vaccae</i> NCTC 11659 + LPS vehicle vs. 30 µg/mL <i>M. vaccae</i> NCTC 11659 + 2.5 ng/mL LPS   | > .1       |
|  |              |                                                                         | 30 µg/mL <i>M. vaccae</i> NCTC 11659 + LPS vehicle vs. 30 µg/mL <i>M. vaccae</i> NCTC 11659 + 250 ng/mL LPS   | > .1       |
|  |              | Between all LPS conditions within 100 µg/mL <i>M. vaccae</i> NCTC 11659 | 100 µg/mL <i>M. vaccae</i> NCTC 11659 + LPS vehicle vs. 100 µg/mL <i>M. vaccae</i> NCTC 11659 + 0.5 ng/mL LPS | > .1       |
|  |              |                                                                         | 100 µg/mL <i>M. vaccae</i> NCTC 11659 + LPS vehicle vs. 100 µg/mL <i>M. vaccae</i> NCTC 11659 + 2.5 ng/mL LPS | > .1       |
|  |              |                                                                         | 100 µg/mL <i>M. vaccae</i> NCTC 11659 + LPS vehicle vs. 100 µg/mL <i>M. vaccae</i> NCTC 11659 + 250 ng/mL LPS | > .1       |
|  |              | Between all LPS conditions within 300 µg/mL <i>M. vaccae</i> NCTC 11659 | 300 µg/mL <i>M. vaccae</i> NCTC 11659 + LPS vehicle vs. 300 µg/mL <i>M. vaccae</i> NCTC 11659 + 0.5 ng/mL LPS | > .1       |
|  |              |                                                                         | 300 µg/mL <i>M. vaccae</i> NCTC 11659 + LPS vehicle vs. 300 µg/mL <i>M. vaccae</i> NCTC 11659 + 2.5 ng/mL LPS | > .1       |
|  |              |                                                                         | 300 µg/mL <i>M. vaccae</i> NCTC 11659 + LPS vehicle vs. 300 µg/mL <i>M. vaccae</i> NCTC 11659 + 250 ng/mL LPS | 0.01240536 |
|  | <i>IL12B</i> | Within 0 ng/mL                                                          | BBS vs. 10 µg/mL <i>M. vaccae</i> NCTC 11659                                                                  | > .1       |

|  |  |                                                                        |                                                                                                             |            |
|--|--|------------------------------------------------------------------------|-------------------------------------------------------------------------------------------------------------|------------|
|  |  |                                                                        | BBS vs. 30 µg/mL <i>M. vaccae</i> NCTC 11659                                                                | < .01      |
|  |  |                                                                        | BBS vs. 100 µg/mL <i>M. vaccae</i> NCTC 11659                                                               | < .01      |
|  |  |                                                                        | BBS vs. 300 µg/mL <i>M. vaccae</i> NCTC 11659                                                               | < .01      |
|  |  | Within 0.5 ng/mL                                                       | BBS vs. 10 µg/mL <i>M. vaccae</i> NCTC 11659                                                                | > .1       |
|  |  |                                                                        | BBS vs. 30 µg/mL <i>M. vaccae</i> NCTC 11659                                                                | > .1       |
|  |  |                                                                        | BBS vs. 100 µg/mL <i>M. vaccae</i> NCTC 11659                                                               | < .01      |
|  |  |                                                                        | BBS vs. 300 µg/mL <i>M. vaccae</i> NCTC 11659                                                               | < .01      |
|  |  | Within 2.5 ng/mL                                                       | BBS vs. 10 µg/mL <i>M. vaccae</i> NCTC 11659                                                                | > .1       |
|  |  |                                                                        | BBS vs. 30 µg/mL <i>M. vaccae</i> NCTC 11659                                                                | 0.0789984  |
|  |  |                                                                        | BBS vs. 100 µg/mL <i>M. vaccae</i> NCTC 11659                                                               | 0.09231063 |
|  |  |                                                                        | BBS vs. 300 µg/mL <i>M. vaccae</i> NCTC 11659                                                               | > .1       |
|  |  | Within 250 ng/mL                                                       | BBS vs. 10 µg/mL <i>M. vaccae</i> NCTC 11659                                                                | > .1       |
|  |  |                                                                        | BBS vs. 30 µg/mL <i>M. vaccae</i> NCTC 11659                                                                | > .1       |
|  |  |                                                                        | BBS vs. 100 µg/mL <i>M. vaccae</i> NCTC 11659                                                               | 0.01916455 |
|  |  |                                                                        | BBS vs. 300 µg/mL <i>M. vaccae</i> NCTC 11659                                                               | < .01      |
|  |  | Between all LPS conditions within BBS                                  | BBS + LPS vehicle vs. BBS + 0.5 ng/mL LPS                                                                   | < .01      |
|  |  |                                                                        | BBS + LPS vehicle vs. BBS + 2.5 ng/mL LPS                                                                   | < .001     |
|  |  |                                                                        | BBS + LPS vehicle vs. BBS + 250 ng/mL LPS                                                                   | < .001     |
|  |  | Between all LPS conditions within 10 µg/mL <i>M. vaccae</i> NCTC 11659 | 10 µg/mL <i>M. vaccae</i> NCTC 11659 + LPS vehicle vs. 10 µg/mL <i>M. vaccae</i> NCTC 11659 + 0.5 ng/mL LPS | > .1       |
|  |  |                                                                        | 10 µg/mL <i>M. vaccae</i> NCTC 11659 + LPS vehicle vs. 10 µg/mL <i>M. vaccae</i> NCTC 11659 + 2.5 ng/mL LPS | < .01      |

|  |              |                                                                         |                                                                                                               |        |
|--|--------------|-------------------------------------------------------------------------|---------------------------------------------------------------------------------------------------------------|--------|
|  |              |                                                                         | 10 µg/mL <i>M. vaccae</i> NCTC 11659 + LPS vehicle vs. 10 µg/mL <i>M. vaccae</i> NCTC 11659 + 250 ng/mL LPS   | < .001 |
|  |              | Between all LPS conditions within 30 µg/mL <i>M. vaccae</i> NCTC 11659  | 30 µg/mL <i>M. vaccae</i> NCTC 11659 + LPS vehicle vs. 30 µg/mL <i>M. vaccae</i> NCTC 11659 + 0.5 ng/mL LPS   | > .1   |
|  |              |                                                                         | 30 µg/mL <i>M. vaccae</i> NCTC 11659 + LPS vehicle vs. 30 µg/mL <i>M. vaccae</i> NCTC 11659 + 2.5 ng/mL LPS   | > .1   |
|  |              |                                                                         | 30 µg/mL <i>M. vaccae</i> NCTC 11659 + LPS vehicle vs. 30 µg/mL <i>M. vaccae</i> NCTC 11659 + 250 ng/mL LPS   | < .001 |
|  |              | Between all LPS conditions within 100 µg/mL <i>M. vaccae</i> NCTC 11659 | 100 µg/mL <i>M. vaccae</i> NCTC 11659 + LPS vehicle vs. 100 µg/mL <i>M. vaccae</i> NCTC 11659 + 0.5 ng/mL LPS | > .1   |
|  |              |                                                                         | 100 µg/mL <i>M. vaccae</i> NCTC 11659 + LPS vehicle vs. 100 µg/mL <i>M. vaccae</i> NCTC 11659 + 2.5 ng/mL LPS | > .1   |
|  |              |                                                                         | 100 µg/mL <i>M. vaccae</i> NCTC 11659 + LPS vehicle vs. 100 µg/mL <i>M. vaccae</i> NCTC 11659 + 250 ng/mL LPS | < .001 |
|  |              | Between all LPS conditions within 300 µg/mL <i>M. vaccae</i> NCTC 11659 | 300 µg/mL <i>M. vaccae</i> NCTC 11659 + LPS vehicle vs. 300 µg/mL <i>M. vaccae</i> NCTC 11659 + 0.5 ng/mL LPS | > .1   |
|  |              |                                                                         | 300 µg/mL <i>M. vaccae</i> NCTC 11659 + LPS vehicle vs. 300 µg/mL <i>M. vaccae</i> NCTC 11659 + 2.5 ng/mL LPS | > .1   |
|  |              |                                                                         | 300 µg/mL <i>M. vaccae</i> NCTC 11659 + LPS vehicle vs. 300 µg/mL <i>M. vaccae</i> NCTC 11659 + 250 ng/mL LPS | < .001 |
|  | <i>IL23A</i> | Within 0 ng/mL                                                          | BBS vs. 10 µg/mL <i>M. vaccae</i> NCTC 11659                                                                  | < .01  |
|  |              |                                                                         | BBS vs. 30 µg/mL <i>M. vaccae</i> NCTC 11659                                                                  | < .01  |
|  |              |                                                                         | BBS vs. 100 µg/mL <i>M. vaccae</i> NCTC 11659                                                                 | < .001 |

|  |                                                                        |                                                                                                             |        |
|--|------------------------------------------------------------------------|-------------------------------------------------------------------------------------------------------------|--------|
|  |                                                                        | BBS vs. 300 µg/mL <i>M. vaccae</i> NCTC 11659                                                               | < .001 |
|  | Within 0.5 ng/mL                                                       | BBS vs. 10 µg/mL <i>M. vaccae</i> NCTC 11659                                                                | > .1   |
|  |                                                                        | BBS vs. 30 µg/mL <i>M. vaccae</i> NCTC 11659                                                                | > .1   |
|  |                                                                        | BBS vs. 100 µg/mL <i>M. vaccae</i> NCTC 11659                                                               | > .1   |
|  |                                                                        | BBS vs. 300 µg/mL <i>M. vaccae</i> NCTC 11659                                                               | > .1   |
|  |                                                                        |                                                                                                             |        |
|  | Within 2.5 ng/mL                                                       | BBS vs. 10 µg/mL <i>M. vaccae</i> NCTC 11659                                                                | > .1   |
|  |                                                                        | BBS vs. 30 µg/mL <i>M. vaccae</i> NCTC 11659                                                                | > .1   |
|  |                                                                        | BBS vs. 100 µg/mL <i>M. vaccae</i> NCTC 11659                                                               | > .1   |
|  |                                                                        | BBS vs. 300 µg/mL <i>M. vaccae</i> NCTC 11659                                                               | > .1   |
|  | Within 250 ng/mL                                                       | BBS vs. 10 µg/mL <i>M. vaccae</i> NCTC 11659                                                                | > .1   |
|  |                                                                        | BBS vs. 30 µg/mL <i>M. vaccae</i> NCTC 11659                                                                | > .1   |
|  |                                                                        | BBS vs. 100 µg/mL <i>M. vaccae</i> NCTC 11659                                                               | < .01  |
|  |                                                                        | BBS vs. 300 µg/mL <i>M. vaccae</i> NCTC 11659                                                               | < .01  |
|  | Between all LPS conditions within BBS                                  | BBS + LPS vehicle vs. BBS + 0.5 ng/mL LPS                                                                   | < .01  |
|  |                                                                        | BBS + LPS vehicle vs. BBS + 2.5 ng/mL LPS                                                                   | < .001 |
|  |                                                                        | BBS + LPS vehicle vs. BBS + 250 ng/mL LPS                                                                   | < .001 |
|  | Between all LPS conditions within 10 µg/mL <i>M. vaccae</i> NCTC 11659 | 10 µg/mL <i>M. vaccae</i> NCTC 11659 + LPS vehicle vs. 10 µg/mL <i>M. vaccae</i> NCTC 11659 + 0.5 ng/mL LPS | > .1   |
|  |                                                                        | 10 µg/mL <i>M. vaccae</i> NCTC 11659 + LPS vehicle vs. 10 µg/mL <i>M. vaccae</i> NCTC 11659 + 2.5 ng/mL LPS | < .01  |
|  |                                                                        | 10 µg/mL <i>M. vaccae</i> NCTC 11659 + LPS vehicle vs. 10 µg/mL <i>M. vaccae</i> NCTC 11659 + 250 ng/mL LPS | < .001 |

|     |             |                                                                                    |                                                                                                                                     |            |
|-----|-------------|------------------------------------------------------------------------------------|-------------------------------------------------------------------------------------------------------------------------------------|------------|
|     |             | Between all LPS conditions within 30 $\mu\text{g/mL}$ <i>M. vaccae</i> NCTC 11659  | 30 $\mu\text{g/mL}$ <i>M. vaccae</i> NCTC 11659 + LPS vehicle vs. 30 $\mu\text{g/mL}$ <i>M. vaccae</i> NCTC 11659 + 0.5 ng/mL LPS   | > .1       |
|     |             |                                                                                    | 30 $\mu\text{g/mL}$ <i>M. vaccae</i> NCTC 11659 + LPS vehicle vs. 30 $\mu\text{g/mL}$ <i>M. vaccae</i> NCTC 11659 + 2.5 ng/mL LPS   | 0.09659867 |
|     |             |                                                                                    | 30 $\mu\text{g/mL}$ <i>M. vaccae</i> NCTC 11659 + LPS vehicle vs. 30 $\mu\text{g/mL}$ <i>M. vaccae</i> NCTC 11659 + 250 ng/mL LPS   | < .001     |
|     |             | Between all LPS conditions within 100 $\mu\text{g/mL}$ <i>M. vaccae</i> NCTC 11659 | 100 $\mu\text{g/mL}$ <i>M. vaccae</i> NCTC 11659 + LPS vehicle vs. 100 $\mu\text{g/mL}$ <i>M. vaccae</i> NCTC 11659 + 0.5 ng/mL LPS | > .1       |
|     |             |                                                                                    | 100 $\mu\text{g/mL}$ <i>M. vaccae</i> NCTC 11659 + LPS vehicle vs. 100 $\mu\text{g/mL}$ <i>M. vaccae</i> NCTC 11659 + 2.5 ng/mL LPS | > .1       |
|     |             |                                                                                    | 100 $\mu\text{g/mL}$ <i>M. vaccae</i> NCTC 11659 + LPS vehicle vs. 100 $\mu\text{g/mL}$ <i>M. vaccae</i> NCTC 11659 + 250 ng/mL LPS | < .001     |
|     |             | Between all LPS conditions within 300 $\mu\text{g/mL}$ <i>M. vaccae</i> NCTC 11659 | 300 $\mu\text{g/mL}$ <i>M. vaccae</i> NCTC 11659 + LPS vehicle vs. 300 $\mu\text{g/mL}$ <i>M. vaccae</i> NCTC 11659 + 0.5 ng/mL LPS | < .01      |
|     |             |                                                                                    | 300 $\mu\text{g/mL}$ <i>M. vaccae</i> NCTC 11659 + LPS vehicle vs. 300 $\mu\text{g/mL}$ <i>M. vaccae</i> NCTC 11659 + 2.5 ng/mL LPS | > .1       |
|     |             |                                                                                    | 300 $\mu\text{g/mL}$ <i>M. vaccae</i> NCTC 11659 + LPS vehicle vs. 300 $\mu\text{g/mL}$ <i>M. vaccae</i> NCTC 11659 + 250 ng/mL LPS | < .01      |
|     |             |                                                                                    |                                                                                                                                     |            |
| S14 | <i>IL10</i> | Within 0 ng/mL                                                                     | BBS vs. 10 $\mu\text{g/mL}$ <i>M. vaccae</i> NCTC 11659                                                                             | 0.03136868 |
|     |             |                                                                                    | BBS vs. 30 $\mu\text{g/mL}$ <i>M. vaccae</i> NCTC 11659                                                                             | 0.0282815  |
|     |             |                                                                                    | BBS vs. 100 $\mu\text{g/mL}$ <i>M. vaccae</i> NCTC 11659                                                                            | 0.03863024 |
|     |             |                                                                                    | BBS vs. 300 $\mu\text{g/mL}$ <i>M. vaccae</i> NCTC 11659                                                                            | > .1       |
|     |             | Within 0.5 ng/mL                                                                   | BBS vs. 10 $\mu\text{g/mL}$ <i>M. vaccae</i> NCTC 11659                                                                             | > .1       |

|  |                                                                        |                                                                                                             |            |
|--|------------------------------------------------------------------------|-------------------------------------------------------------------------------------------------------------|------------|
|  |                                                                        | BBS vs. 30 µg/mL <i>M. vaccae</i> NCTC 11659                                                                | > .1       |
|  |                                                                        | BBS vs. 100 µg/mL <i>M. vaccae</i> NCTC 11659                                                               | 0.02616086 |
|  |                                                                        | BBS vs. 300 µg/mL <i>M. vaccae</i> NCTC 11659                                                               | < .01      |
|  | Within 2.5 ng/mL                                                       | BBS vs. 10 µg/mL <i>M. vaccae</i> NCTC 11659                                                                | > .1       |
|  |                                                                        | BBS vs. 30 µg/mL <i>M. vaccae</i> NCTC 11659                                                                | > .1       |
|  |                                                                        | BBS vs. 100 µg/mL <i>M. vaccae</i> NCTC 11659                                                               | 0.04470415 |
|  |                                                                        | BBS vs. 300 µg/mL <i>M. vaccae</i> NCTC 11659                                                               | < .01      |
|  | Within 250 ng/mL                                                       | BBS vs. 10 µg/mL <i>M. vaccae</i> NCTC 11659                                                                | > .1       |
|  |                                                                        | BBS vs. 30 µg/mL <i>M. vaccae</i> NCTC 11659                                                                | > .1       |
|  |                                                                        | BBS vs. 100 µg/mL <i>M. vaccae</i> NCTC 11659                                                               | > .1       |
|  |                                                                        | BBS vs. 300 µg/mL <i>M. vaccae</i> NCTC 11659                                                               | > .1       |
|  | Between all LPS conditions within BBS                                  | BBS + LPS vehicle vs. BBS + 0.5 ng/mL LPS                                                                   | 0.0232713  |
|  |                                                                        | BBS + LPS vehicle vs. BBS + 2.5 ng/mL LPS                                                                   | < .01      |
|  |                                                                        | BBS + LPS vehicle vs. BBS + 250 ng/mL LPS                                                                   | > .1       |
|  | Between all LPS conditions within 10 µg/mL <i>M. vaccae</i> NCTC 11659 | 10 µg/mL <i>M. vaccae</i> NCTC 11659 + LPS vehicle vs. 10 µg/mL <i>M. vaccae</i> NCTC 11659 + 0.5 ng/mL LPS | > .1       |
|  |                                                                        | 10 µg/mL <i>M. vaccae</i> NCTC 11659 + LPS vehicle vs. 10 µg/mL <i>M. vaccae</i> NCTC 11659 + 2.5 ng/mL LPS | > .1       |
|  |                                                                        | 10 µg/mL <i>M. vaccae</i> NCTC 11659 + LPS vehicle vs. 10 µg/mL <i>M. vaccae</i> NCTC 11659 + 250 ng/mL LPS | > .1       |
|  | Between all LPS conditions within 30 µg/mL <i>M. vaccae</i> NCTC 11659 | 30 µg/mL <i>M. vaccae</i> NCTC 11659 + LPS vehicle vs. 30 µg/mL <i>M. vaccae</i> NCTC 11659 + 0.5 ng/mL LPS | > .1       |

|                                               |                                                                         |                                                                                                               |                                              |      |
|-----------------------------------------------|-------------------------------------------------------------------------|---------------------------------------------------------------------------------------------------------------|----------------------------------------------|------|
|                                               |                                                                         | 30 µg/mL <i>M. vaccae</i> NCTC 11659 + LPS vehicle vs. 30 µg/mL <i>M. vaccae</i> NCTC 11659 + 2.5 ng/mL LPS   | > .1                                         |      |
|                                               |                                                                         | 30 µg/mL <i>M. vaccae</i> NCTC 11659 + LPS vehicle vs. 30 µg/mL <i>M. vaccae</i> NCTC 11659 + 250 ng/mL LPS   | > .1                                         |      |
|                                               | Between all LPS conditions within 100 µg/mL <i>M. vaccae</i> NCTC 11659 | 100 µg/mL <i>M. vaccae</i> NCTC 11659 + LPS vehicle vs. 100 µg/mL <i>M. vaccae</i> NCTC 11659 + 0.5 ng/mL LPS | 0.03190491                                   |      |
|                                               |                                                                         | 100 µg/mL <i>M. vaccae</i> NCTC 11659 + LPS vehicle vs. 100 µg/mL <i>M. vaccae</i> NCTC 11659 + 2.5 ng/mL LPS | > .1                                         |      |
|                                               |                                                                         | 100 µg/mL <i>M. vaccae</i> NCTC 11659 + LPS vehicle vs. 100 µg/mL <i>M. vaccae</i> NCTC 11659 + 250 ng/mL LPS | > .1                                         |      |
|                                               | Between all LPS conditions within 300 µg/mL <i>M. vaccae</i> NCTC 11659 | 300 µg/mL <i>M. vaccae</i> NCTC 11659 + LPS vehicle vs. 300 µg/mL <i>M. vaccae</i> NCTC 11659 + 0.5 ng/mL LPS | < .01                                        |      |
|                                               |                                                                         | 300 µg/mL <i>M. vaccae</i> NCTC 11659 + LPS vehicle vs. 300 µg/mL <i>M. vaccae</i> NCTC 11659 + 2.5 ng/mL LPS | 0.03972336                                   |      |
|                                               |                                                                         | 300 µg/mL <i>M. vaccae</i> NCTC 11659 + LPS vehicle vs. 300 µg/mL <i>M. vaccae</i> NCTC 11659 + 250 ng/mL LPS | 0.0101786                                    |      |
|                                               | TGFB                                                                    | Within 0 ng/mL                                                                                                | BBS vs. 10 µg/mL <i>M. vaccae</i> NCTC 11659 | > .1 |
|                                               |                                                                         |                                                                                                               | BBS vs. 30 µg/mL <i>M. vaccae</i> NCTC 11659 | > .1 |
| BBS vs. 100 µg/mL <i>M. vaccae</i> NCTC 11659 |                                                                         |                                                                                                               | > .1                                         |      |
| BBS vs. 300 µg/mL <i>M. vaccae</i> NCTC 11659 |                                                                         |                                                                                                               | > .1                                         |      |
| Within 0.5 ng/mL                              |                                                                         | BBS vs. 10 µg/mL <i>M. vaccae</i> NCTC 11659                                                                  | > .1                                         |      |
|                                               |                                                                         | BBS vs. 30 µg/mL <i>M. vaccae</i> NCTC 11659                                                                  | > .1                                         |      |
|                                               |                                                                         | BBS vs. 100 µg/mL <i>M. vaccae</i> NCTC 11659                                                                 | > .1                                         |      |



|                                                                        |                                                                                                             |            |
|------------------------------------------------------------------------|-------------------------------------------------------------------------------------------------------------|------------|
|                                                                        | BBS vs. 300 µg/mL <i>M. vaccae</i> NCTC 11659                                                               | > .1       |
| Within 250 ng/mL                                                       | BBS vs. 10 µg/mL <i>M. vaccae</i> NCTC 11659                                                                | > .1       |
|                                                                        | BBS vs. 30 µg/mL <i>M. vaccae</i> NCTC 11659                                                                | > .1       |
|                                                                        | BBS vs. 100 µg/mL <i>M. vaccae</i> NCTC 11659                                                               | > .1       |
|                                                                        | BBS vs. 300 µg/mL <i>M. vaccae</i> NCTC 11659                                                               | > .1       |
|                                                                        |                                                                                                             |            |
| Within 2.5 ng/mL                                                       | BBS vs. 10 µg/mL <i>M. vaccae</i> NCTC 11659                                                                | > .1       |
|                                                                        | BBS vs. 30 µg/mL <i>M. vaccae</i> NCTC 11659                                                                | 0.03918828 |
|                                                                        | BBS vs. 100 µg/mL <i>M. vaccae</i> NCTC 11659                                                               | 0.06495136 |
|                                                                        | BBS vs. 300 µg/mL <i>M. vaccae</i> NCTC 11659                                                               | 0.03227054 |
| Between all LPS conditions within BBS                                  | BBS + LPS vehicle vs. BBS + 0.5 ng/mL LPS                                                                   | > .1       |
|                                                                        | BBS + LPS vehicle vs. BBS + 250 ng/mL LPS                                                                   | > .1       |
|                                                                        | BBS + LPS vehicle vs. BBS + 2.5 ng/mL LPS                                                                   | 0.0433803  |
| Between all LPS conditions within 10 µg/mL <i>M. vaccae</i> NCTC 11659 | 10 µg/mL <i>M. vaccae</i> NCTC 11659 + LPS vehicle vs. 10 µg/mL <i>M. vaccae</i> NCTC 11659 + 0.5 ng/mL LPS | > .1       |
|                                                                        | 10 µg/mL <i>M. vaccae</i> NCTC 11659 + LPS vehicle vs. 10 µg/mL <i>M. vaccae</i> NCTC 11659 + 250 ng/mL LPS | > .1       |
|                                                                        | 10 µg/mL <i>M. vaccae</i> NCTC 11659 + LPS vehicle vs. 10 µg/mL <i>M. vaccae</i> NCTC 11659 + 2.5 ng/mL LPS | 0.01099135 |
| Between all LPS conditions within 30 µg/mL <i>M. vaccae</i> NCTC 11659 | 30 µg/mL <i>M. vaccae</i> NCTC 11659 + LPS vehicle vs. 30 µg/mL <i>M. vaccae</i> NCTC 11659 + 0.5 ng/mL LPS | > .1       |
|                                                                        | 30 µg/mL <i>M. vaccae</i> NCTC 11659 + LPS vehicle vs. 30 µg/mL <i>M. vaccae</i> NCTC 11659 + 250 ng/mL LPS | 0.01357702 |

|  |  |                                                                         |                                                                                                               |            |
|--|--|-------------------------------------------------------------------------|---------------------------------------------------------------------------------------------------------------|------------|
|  |  | Between all LPS conditions within 100 µg/mL <i>M. vaccae</i> NCTC 11659 | 30 µg/mL <i>M. vaccae</i> NCTC 11659 + LPS vehicle vs. 30 µg/mL <i>M. vaccae</i> NCTC 11659 + 2.5 ng/mL LPS   | < .001     |
|  |  |                                                                         | 100 µg/mL <i>M. vaccae</i> NCTC 11659 + LPS vehicle vs. 100 µg/mL <i>M. vaccae</i> NCTC 11659 + 0.5 ng/mL LPS | > .1       |
|  |  |                                                                         | 100 µg/mL <i>M. vaccae</i> NCTC 11659 + LPS vehicle vs. 100 µg/mL <i>M. vaccae</i> NCTC 11659 + 2.5 ng/mL LPS | > .1       |
|  |  |                                                                         | 100 µg/mL <i>M. vaccae</i> NCTC 11659 + LPS vehicle vs. 100 µg/mL <i>M. vaccae</i> NCTC 11659 + 250 ng/mL LPS | > .1       |
|  |  | Between all LPS conditions within 300 µg/mL <i>M. vaccae</i> NCTC 11659 | 300 µg/mL <i>M. vaccae</i> NCTC 11659 + LPS vehicle vs. 300 µg/mL <i>M. vaccae</i> NCTC 11659 + 0.5 ng/mL LPS | > .1       |
|  |  |                                                                         | 300 µg/mL <i>M. vaccae</i> NCTC 11659 + LPS vehicle vs. 300 µg/mL <i>M. vaccae</i> NCTC 11659 + 2.5 ng/mL LPS | > .1       |
|  |  |                                                                         | 300 µg/mL <i>M. vaccae</i> NCTC 11659 + LPS vehicle vs. 300 µg/mL <i>M. vaccae</i> NCTC 11659 + 250 ng/mL LPS | > .1       |
|  |  |                                                                         |                                                                                                               |            |
|  |  | Within 0 ng/mL                                                          | BBS vs. 10 µg/mL <i>M. vaccae</i> NCTC 11659                                                                  | > .1       |
|  |  |                                                                         | BBS vs. 30 µg/mL <i>M. vaccae</i> NCTC 11659                                                                  | > .1       |
|  |  |                                                                         | BBS vs. 100 µg/mL <i>M. vaccae</i> NCTC 11659                                                                 | > .1       |
|  |  |                                                                         | BBS vs. 300 µg/mL <i>M. vaccae</i> NCTC 11659                                                                 | > .1       |
|  |  | Within 0.5 ng/mL                                                        | BBS vs. 10 µg/mL <i>M. vaccae</i> NCTC 11659                                                                  | > .1       |
|  |  |                                                                         | BBS vs. 30 µg/mL <i>M. vaccae</i> NCTC 11659                                                                  | > .1       |
|  |  |                                                                         | BBS vs. 100 µg/mL <i>M. vaccae</i> NCTC 11659                                                                 | 0.01217065 |
|  |  |                                                                         | BBS vs. 300 µg/mL <i>M. vaccae</i> NCTC 11659                                                                 | 0.0264807  |
|  |  | Within 2.5 ng/mL                                                        | BBS vs. 10 µg/mL <i>M. vaccae</i> NCTC 11659                                                                  | > .1       |

|  |                                                                        |                                                                                                             |            |
|--|------------------------------------------------------------------------|-------------------------------------------------------------------------------------------------------------|------------|
|  |                                                                        | BBS vs. 30 µg/mL <i>M. vaccae</i> NCTC 11659                                                                | > .1       |
|  |                                                                        | BBS vs. 100 µg/mL <i>M. vaccae</i> NCTC 11659                                                               | > .1       |
|  |                                                                        | BBS vs. 300 µg/mL <i>M. vaccae</i> NCTC 11659                                                               | > .1       |
|  | Within 250 ng/mL                                                       | BBS vs. 10 µg/mL <i>M. vaccae</i> NCTC 11659                                                                | > .1       |
|  |                                                                        | BBS vs. 30 µg/mL <i>M. vaccae</i> NCTC 11659                                                                | > .1       |
|  |                                                                        | BBS vs. 100 µg/mL <i>M. vaccae</i> NCTC 11659                                                               | > .1       |
|  |                                                                        | BBS vs. 300 µg/mL <i>M. vaccae</i> NCTC 11659                                                               | > .1       |
|  | Between all LPS conditions within BBS                                  | BBS + LPS vehicle vs. BBS + 0.5 ng/mL LPS                                                                   | 0.06869352 |
|  |                                                                        | BBS + LPS vehicle vs. BBS + 2.5 ng/mL LPS                                                                   | > .1       |
|  |                                                                        | BBS + LPS vehicle vs. BBS + 250 ng/mL LPS                                                                   | > .1       |
|  | Between all LPS conditions within 10 µg/mL <i>M. vaccae</i> NCTC 11659 | 10 µg/mL <i>M. vaccae</i> NCTC 11659 + LPS vehicle vs. 10 µg/mL <i>M. vaccae</i> NCTC 11659 + 0.5 ng/mL LPS | > .1       |
|  |                                                                        | 10 µg/mL <i>M. vaccae</i> NCTC 11659 + LPS vehicle vs. 10 µg/mL <i>M. vaccae</i> NCTC 11659 + 2.5 ng/mL LPS | > .1       |
|  |                                                                        | 10 µg/mL <i>M. vaccae</i> NCTC 11659 + LPS vehicle vs. 10 µg/mL <i>M. vaccae</i> NCTC 11659 + 250 ng/mL LPS | 0.02535678 |
|  | Between all LPS conditions within 30 µg/mL <i>M. vaccae</i> NCTC 11659 | 30 µg/mL <i>M. vaccae</i> NCTC 11659 + LPS vehicle vs. 30 µg/mL <i>M. vaccae</i> NCTC 11659 + 0.5 ng/mL LPS | 0.0625251  |
|  |                                                                        | 30 µg/mL <i>M. vaccae</i> NCTC 11659 + LPS vehicle vs. 30 µg/mL <i>M. vaccae</i> NCTC 11659 + 2.5 ng/mL LPS | > .1       |
|  |                                                                        | 30 µg/mL <i>M. vaccae</i> NCTC 11659 + LPS vehicle vs. 30 µg/mL <i>M. vaccae</i> NCTC 11659 + 250 ng/mL LPS | > .1       |

|  |                   |                                                                                    |                                                                                                                                     |            |
|--|-------------------|------------------------------------------------------------------------------------|-------------------------------------------------------------------------------------------------------------------------------------|------------|
|  |                   | Between all LPS conditions within 100 $\mu\text{g/mL}$ <i>M. vaccae</i> NCTC 11659 | 100 $\mu\text{g/mL}$ <i>M. vaccae</i> NCTC 11659 + LPS vehicle vs. 100 $\mu\text{g/mL}$ <i>M. vaccae</i> NCTC 11659 + 0.5 ng/mL LPS | > .1       |
|  |                   |                                                                                    | 100 $\mu\text{g/mL}$ <i>M. vaccae</i> NCTC 11659 + LPS vehicle vs. 100 $\mu\text{g/mL}$ <i>M. vaccae</i> NCTC 11659 + 2.5 ng/mL LPS | > .1       |
|  |                   |                                                                                    | 100 $\mu\text{g/mL}$ <i>M. vaccae</i> NCTC 11659 + LPS vehicle vs. 100 $\mu\text{g/mL}$ <i>M. vaccae</i> NCTC 11659 + 250 ng/mL LPS | > .1       |
|  |                   | Between all LPS conditions within 300 $\mu\text{g/mL}$ <i>M. vaccae</i> NCTC 11659 | 300 $\mu\text{g/mL}$ <i>M. vaccae</i> NCTC 11659 + LPS vehicle vs. 300 $\mu\text{g/mL}$ <i>M. vaccae</i> NCTC 11659 + 0.5 ng/mL LPS | > .1       |
|  |                   |                                                                                    | 300 $\mu\text{g/mL}$ <i>M. vaccae</i> NCTC 11659 + LPS vehicle vs. 300 $\mu\text{g/mL}$ <i>M. vaccae</i> NCTC 11659 + 2.5 ng/mL LPS | > .1       |
|  |                   |                                                                                    | 300 $\mu\text{g/mL}$ <i>M. vaccae</i> NCTC 11659 + LPS vehicle vs. 300 $\mu\text{g/mL}$ <i>M. vaccae</i> NCTC 11659 + 250 ng/mL LPS | 0.01371849 |
|  | <i>IL10:IL12B</i> | Within 0 ng/mL                                                                     | BBS vs. 10 $\mu\text{g/mL}$ <i>M. vaccae</i> NCTC 11659                                                                             | > .1       |
|  |                   |                                                                                    | BBS vs. 30 $\mu\text{g/mL}$ <i>M. vaccae</i> NCTC 11659                                                                             | < .01      |
|  |                   |                                                                                    | BBS vs. 100 $\mu\text{g/mL}$ <i>M. vaccae</i> NCTC 11659                                                                            | < .01      |
|  |                   |                                                                                    | BBS vs. 300 $\mu\text{g/mL}$ <i>M. vaccae</i> NCTC 11659                                                                            | < .001     |
|  |                   | Within 0.5 ng/mL                                                                   | BBS vs. 10 $\mu\text{g/mL}$ <i>M. vaccae</i> NCTC 11659                                                                             | > .1       |
|  |                   |                                                                                    | BBS vs. 30 $\mu\text{g/mL}$ <i>M. vaccae</i> NCTC 11659                                                                             | > .1       |
|  |                   |                                                                                    | BBS vs. 100 $\mu\text{g/mL}$ <i>M. vaccae</i> NCTC 11659                                                                            | < .01      |
|  |                   |                                                                                    | BBS vs. 300 $\mu\text{g/mL}$ <i>M. vaccae</i> NCTC 11659                                                                            | < .001     |
|  |                   | Within 2.5 ng/mL                                                                   | BBS vs. 10 $\mu\text{g/mL}$ <i>M. vaccae</i> NCTC 11659                                                                             | 0.03528282 |
|  |                   |                                                                                    | BBS vs. 30 $\mu\text{g/mL}$ <i>M. vaccae</i> NCTC 11659                                                                             | 0.01126892 |
|  |                   |                                                                                    | BBS vs. 100 $\mu\text{g/mL}$ <i>M. vaccae</i> NCTC 11659                                                                            | > .1       |

|  |                                                                         |                                                                                                               |            |
|--|-------------------------------------------------------------------------|---------------------------------------------------------------------------------------------------------------|------------|
|  |                                                                         | BBS vs. 300 µg/mL <i>M. vaccae</i> NCTC 11659                                                                 | > .1       |
|  | Within 250 ng/mL                                                        | BBS vs. 10 µg/mL <i>M. vaccae</i> NCTC 11659                                                                  | > .1       |
|  |                                                                         | BBS vs. 30 µg/mL <i>M. vaccae</i> NCTC 11659                                                                  | 0.06619748 |
|  |                                                                         | BBS vs. 100 µg/mL <i>M. vaccae</i> NCTC 11659                                                                 | < .01      |
|  |                                                                         | BBS vs. 300 µg/mL <i>M. vaccae</i> NCTC 11659                                                                 | < .01      |
|  | Between all LPS conditions within BBS                                   | BBS + LPS vehicle vs. BBS + 0.5 ng/mL LPS                                                                     | 0.04940273 |
|  |                                                                         | BBS + LPS vehicle vs. BBS + 2.5 ng/mL LPS                                                                     | < .001     |
|  |                                                                         | BBS + LPS vehicle vs. BBS + 250 ng/mL LPS                                                                     | < .001     |
|  | Between all LPS conditions within 10 µg/mL <i>M. vaccae</i> NCTC 11659  | 10 µg/mL <i>M. vaccae</i> NCTC 11659 + LPS vehicle vs. 10 µg/mL <i>M. vaccae</i> NCTC 11659 + 0.5 ng/mL LPS   | 0.04720208 |
|  |                                                                         | 10 µg/mL <i>M. vaccae</i> NCTC 11659 + LPS vehicle vs. 10 µg/mL <i>M. vaccae</i> NCTC 11659 + 2.5 ng/mL LPS   | < .01      |
|  |                                                                         | 10 µg/mL <i>M. vaccae</i> NCTC 11659 + LPS vehicle vs. 10 µg/mL <i>M. vaccae</i> NCTC 11659 + 250 ng/mL LPS   | < .001     |
|  | Between all LPS conditions within 30 µg/mL <i>M. vaccae</i> NCTC 11659  | 30 µg/mL <i>M. vaccae</i> NCTC 11659 + LPS vehicle vs. 30 µg/mL <i>M. vaccae</i> NCTC 11659 + 0.5 ng/mL LPS   | > .1       |
|  |                                                                         | 30 µg/mL <i>M. vaccae</i> NCTC 11659 + LPS vehicle vs. 30 µg/mL <i>M. vaccae</i> NCTC 11659 + 2.5 ng/mL LPS   | > .1       |
|  |                                                                         | 30 µg/mL <i>M. vaccae</i> NCTC 11659 + LPS vehicle vs. 30 µg/mL <i>M. vaccae</i> NCTC 11659 + 250 ng/mL LPS   | < .001     |
|  | Between all LPS conditions within 100 µg/mL <i>M. vaccae</i> NCTC 11659 | 100 µg/mL <i>M. vaccae</i> NCTC 11659 + LPS vehicle vs. 100 µg/mL <i>M. vaccae</i> NCTC 11659 + 0.5 ng/mL LPS | > .1       |

|  |                   |                                                                         |                                                                                                               |            |
|--|-------------------|-------------------------------------------------------------------------|---------------------------------------------------------------------------------------------------------------|------------|
|  |                   |                                                                         | 100 µg/mL <i>M. vaccae</i> NCTC 11659 + LPS vehicle vs. 100 µg/mL <i>M. vaccae</i> NCTC 11659 + 2.5 ng/mL LPS | > .1       |
|  |                   |                                                                         | 100 µg/mL <i>M. vaccae</i> NCTC 11659 + LPS vehicle vs. 100 µg/mL <i>M. vaccae</i> NCTC 11659 + 250 ng/mL LPS | < .001     |
|  |                   | Between all LPS conditions within 300 µg/mL <i>M. vaccae</i> NCTC 11659 | 300 µg/mL <i>M. vaccae</i> NCTC 11659 + LPS vehicle vs. 300 µg/mL <i>M. vaccae</i> NCTC 11659 + 0.5 ng/mL LPS | > .1       |
|  |                   |                                                                         | 300 µg/mL <i>M. vaccae</i> NCTC 11659 + LPS vehicle vs. 300 µg/mL <i>M. vaccae</i> NCTC 11659 + 2.5 ng/mL LPS | > .1       |
|  |                   |                                                                         | 300 µg/mL <i>M. vaccae</i> NCTC 11659 + LPS vehicle vs. 300 µg/mL <i>M. vaccae</i> NCTC 11659 + 250 ng/mL LPS | < .001     |
|  |                   |                                                                         |                                                                                                               |            |
|  | <i>IL10:IL23A</i> | Within 0 ng/mL                                                          | BBS vs. 10 µg/mL <i>M. vaccae</i> NCTC 11659                                                                  | > .1       |
|  |                   |                                                                         | BBS vs. 30 µg/mL <i>M. vaccae</i> NCTC 11659                                                                  | 0.01920024 |
|  |                   |                                                                         | BBS vs. 100 µg/mL <i>M. vaccae</i> NCTC 11659                                                                 | < .01      |
|  |                   |                                                                         | BBS vs. 300 µg/mL <i>M. vaccae</i> NCTC 11659                                                                 | < .001     |
|  |                   | Within 0.5 ng/mL                                                        | BBS vs. 10 µg/mL <i>M. vaccae</i> NCTC 11659                                                                  | > .1       |
|  |                   |                                                                         | BBS vs. 30 µg/mL <i>M. vaccae</i> NCTC 11659                                                                  | > .1       |
|  |                   |                                                                         | BBS vs. 100 µg/mL <i>M. vaccae</i> NCTC 11659                                                                 | < .01      |
|  |                   |                                                                         | BBS vs. 300 µg/mL <i>M. vaccae</i> NCTC 11659                                                                 | < .01      |
|  |                   | Within 2.5 ng/mL                                                        | BBS vs. 10 µg/mL <i>M. vaccae</i> NCTC 11659                                                                  | > .1       |
|  |                   |                                                                         | BBS vs. 30 µg/mL <i>M. vaccae</i> NCTC 11659                                                                  | > .1       |
|  |                   |                                                                         | BBS vs. 100 µg/mL <i>M. vaccae</i> NCTC 11659                                                                 | > .1       |
|  |                   |                                                                         | BBS vs. 300 µg/mL <i>M. vaccae</i> NCTC 11659                                                                 | 0.01299137 |
|  |                   | Within 250 ng/mL                                                        | BBS vs. 10 µg/mL <i>M. vaccae</i> NCTC 11659                                                                  | > .1       |

|  |                                                                         |                                                                                                               |            |
|--|-------------------------------------------------------------------------|---------------------------------------------------------------------------------------------------------------|------------|
|  |                                                                         | BBS vs. 30 µg/mL <i>M. vaccae</i> NCTC 11659                                                                  | 0.01408542 |
|  |                                                                         | BBS vs. 100 µg/mL <i>M. vaccae</i> NCTC 11659                                                                 | < .01      |
|  |                                                                         | BBS vs. 300 µg/mL <i>M. vaccae</i> NCTC 11659                                                                 | 0.01154322 |
|  | Between all LPS conditions within BBS                                   | BBS + LPS vehicle vs. BBS + 0.5 ng/mL LPS                                                                     | 0.04855252 |
|  |                                                                         | BBS + LPS vehicle vs. BBS + 2.5 ng/mL LPS                                                                     | < .01      |
|  |                                                                         | BBS + LPS vehicle vs. BBS + 250 ng/mL LPS                                                                     | < .001     |
|  | Between all LPS conditions within 10 µg/mL <i>M. vaccae</i> NCTC 11659  | 10 µg/mL <i>M. vaccae</i> NCTC 11659 + LPS vehicle vs. 10 µg/mL <i>M. vaccae</i> NCTC 11659 + 0.5 ng/mL LPS   | > .1       |
|  |                                                                         | 10 µg/mL <i>M. vaccae</i> NCTC 11659 + LPS vehicle vs. 10 µg/mL <i>M. vaccae</i> NCTC 11659 + 2.5 ng/mL LPS   | < .01      |
|  |                                                                         | 10 µg/mL <i>M. vaccae</i> NCTC 11659 + LPS vehicle vs. 10 µg/mL <i>M. vaccae</i> NCTC 11659 + 250 ng/mL LPS   | < .001     |
|  | Between all LPS conditions within 30 µg/mL <i>M. vaccae</i> NCTC 11659  | 30 µg/mL <i>M. vaccae</i> NCTC 11659 + LPS vehicle vs. 30 µg/mL <i>M. vaccae</i> NCTC 11659 + 0.5 ng/mL LPS   | > .1       |
|  |                                                                         | 30 µg/mL <i>M. vaccae</i> NCTC 11659 + LPS vehicle vs. 30 µg/mL <i>M. vaccae</i> NCTC 11659 + 2.5 ng/mL LPS   | > .1       |
|  |                                                                         | 30 µg/mL <i>M. vaccae</i> NCTC 11659 + LPS vehicle vs. 30 µg/mL <i>M. vaccae</i> NCTC 11659 + 250 ng/mL LPS   | < .001     |
|  | Between all LPS conditions within 100 µg/mL <i>M. vaccae</i> NCTC 11659 | 100 µg/mL <i>M. vaccae</i> NCTC 11659 + LPS vehicle vs. 100 µg/mL <i>M. vaccae</i> NCTC 11659 + 0.5 ng/mL LPS | > .1       |
|  |                                                                         | 100 µg/mL <i>M. vaccae</i> NCTC 11659 + LPS vehicle vs. 100 µg/mL <i>M. vaccae</i> NCTC 11659 + 2.5 ng/mL LPS | 0.07592508 |

|     |            |                                                                         |                                                                                                               |            |
|-----|------------|-------------------------------------------------------------------------|---------------------------------------------------------------------------------------------------------------|------------|
| S15 | TGFB:IL12A | Between all LPS conditions within 300 µg/mL <i>M. vaccae</i> NCTC 11659 | 100 µg/mL <i>M. vaccae</i> NCTC 11659 + LPS vehicle vs. 100 µg/mL <i>M. vaccae</i> NCTC 11659 + 250 ng/mL LPS | < .001     |
|     |            |                                                                         | 300 µg/mL <i>M. vaccae</i> NCTC 11659 + LPS vehicle vs. 300 µg/mL <i>M. vaccae</i> NCTC 11659 + 0.5 ng/mL LPS | > .1       |
|     |            |                                                                         | 300 µg/mL <i>M. vaccae</i> NCTC 11659 + LPS vehicle vs. 300 µg/mL <i>M. vaccae</i> NCTC 11659 + 2.5 ng/mL LPS | > .1       |
|     |            |                                                                         | 300 µg/mL <i>M. vaccae</i> NCTC 11659 + LPS vehicle vs. 300 µg/mL <i>M. vaccae</i> NCTC 11659 + 250 ng/mL LPS | < .001     |
|     |            | Within 0 ng/mL                                                          | BBS vs. 10 µg/mL <i>M. vaccae</i> NCTC 11659                                                                  | > .1       |
|     |            |                                                                         | BBS vs. 30 µg/mL <i>M. vaccae</i> NCTC 11659                                                                  | > .1       |
|     |            |                                                                         | BBS vs. 100 µg/mL <i>M. vaccae</i> NCTC 11659                                                                 | > .1       |
|     |            |                                                                         | BBS vs. 300 µg/mL <i>M. vaccae</i> NCTC 11659                                                                 | > .1       |
|     |            | Within 0.5 ng/mL                                                        | BBS vs. 10 µg/mL <i>M. vaccae</i> NCTC 11659                                                                  | > .1       |
|     |            |                                                                         | BBS vs. 30 µg/mL <i>M. vaccae</i> NCTC 11659                                                                  | > .1       |
|     |            |                                                                         | BBS vs. 100 µg/mL <i>M. vaccae</i> NCTC 11659                                                                 | > .1       |
|     |            |                                                                         | BBS vs. 300 µg/mL <i>M. vaccae</i> NCTC 11659                                                                 | > .1       |
|     |            | Within 2.5 ng/mL                                                        | BBS vs. 10 µg/mL <i>M. vaccae</i> NCTC 11659                                                                  | > .1       |
|     |            |                                                                         | BBS vs. 30 µg/mL <i>M. vaccae</i> NCTC 11659                                                                  | 0.07904917 |
|     |            |                                                                         | BBS vs. 100 µg/mL <i>M. vaccae</i> NCTC 11659                                                                 | 0.09003819 |
|     |            |                                                                         | BBS vs. 300 µg/mL <i>M. vaccae</i> NCTC 11659                                                                 | < .01      |
|     |            | Within 250 ng/mL                                                        | BBS vs. 10 µg/mL <i>M. vaccae</i> NCTC 11659                                                                  | > .1       |
|     |            |                                                                         | BBS vs. 30 µg/mL <i>M. vaccae</i> NCTC 11659                                                                  | > .1       |
|     |            |                                                                         | BBS vs. 100 µg/mL <i>M. vaccae</i> NCTC 11659                                                                 | > .1       |



|  |                                                                         |                                                                                                               |            |
|--|-------------------------------------------------------------------------|---------------------------------------------------------------------------------------------------------------|------------|
|  |                                                                         | BBS vs. 300 µg/mL <i>M. vaccae</i> NCTC 11659                                                                 | > .1       |
|  | Between all LPS conditions within BBS                                   | BBS + LPS vehicle vs. BBS + 0.5 ng/mL LPS                                                                     | > .1       |
|  |                                                                         | BBS + LPS vehicle vs. BBS + 2.5 ng/mL LPS                                                                     | > .1       |
|  |                                                                         | BBS + LPS vehicle vs. BBS + 250 ng/mL LPS                                                                     | > .1       |
|  | Between all LPS conditions within 10 µg/mL <i>M. vaccae</i> NCTC 11659  | 10 µg/mL <i>M. vaccae</i> NCTC 11659 + LPS vehicle vs. 10 µg/mL <i>M. vaccae</i> NCTC 11659 + 0.5 ng/mL LPS   | > .1       |
|  |                                                                         | 10 µg/mL <i>M. vaccae</i> NCTC 11659 + LPS vehicle vs. 10 µg/mL <i>M. vaccae</i> NCTC 11659 + 2.5 ng/mL LPS   | > .1       |
|  |                                                                         | 10 µg/mL <i>M. vaccae</i> NCTC 11659 + LPS vehicle vs. 10 µg/mL <i>M. vaccae</i> NCTC 11659 + 250 ng/mL LPS   | 0.02780981 |
|  | Between all LPS conditions within 30 µg/mL <i>M. vaccae</i> NCTC 11659  | 30 µg/mL <i>M. vaccae</i> NCTC 11659 + LPS vehicle vs. 30 µg/mL <i>M. vaccae</i> NCTC 11659 + 0.5 ng/mL LPS   | > .1       |
|  |                                                                         | 30 µg/mL <i>M. vaccae</i> NCTC 11659 + LPS vehicle vs. 30 µg/mL <i>M. vaccae</i> NCTC 11659 + 2.5 ng/mL LPS   | < .01      |
|  |                                                                         | 30 µg/mL <i>M. vaccae</i> NCTC 11659 + LPS vehicle vs. 30 µg/mL <i>M. vaccae</i> NCTC 11659 + 250 ng/mL LPS   | > .1       |
|  | Between all LPS conditions within 100 µg/mL <i>M. vaccae</i> NCTC 11659 | 100 µg/mL <i>M. vaccae</i> NCTC 11659 + LPS vehicle vs. 100 µg/mL <i>M. vaccae</i> NCTC 11659 + 0.5 ng/mL LPS | > .1       |
|  |                                                                         | 100 µg/mL <i>M. vaccae</i> NCTC 11659 + LPS vehicle vs. 100 µg/mL <i>M. vaccae</i> NCTC 11659 + 2.5 ng/mL LPS | > .1       |
|  |                                                                         | 100 µg/mL <i>M. vaccae</i> NCTC 11659 + LPS vehicle vs. 100 µg/mL <i>M. vaccae</i> NCTC 11659 + 250 ng/mL LPS | > .1       |

|  |            |                                                                                    |                                                                                                                                     |            |
|--|------------|------------------------------------------------------------------------------------|-------------------------------------------------------------------------------------------------------------------------------------|------------|
|  |            | Between all LPS conditions within 300 $\mu\text{g/mL}$ <i>M. vaccae</i> NCTC 11659 | 300 $\mu\text{g/mL}$ <i>M. vaccae</i> NCTC 11659 + LPS vehicle vs. 300 $\mu\text{g/mL}$ <i>M. vaccae</i> NCTC 11659 + 0.5 ng/mL LPS | > .1       |
|  |            |                                                                                    | 300 $\mu\text{g/mL}$ <i>M. vaccae</i> NCTC 11659 + LPS vehicle vs. 300 $\mu\text{g/mL}$ <i>M. vaccae</i> NCTC 11659 + 2.5 ng/mL LPS | > .1       |
|  |            |                                                                                    | 300 $\mu\text{g/mL}$ <i>M. vaccae</i> NCTC 11659 + LPS vehicle vs. 300 $\mu\text{g/mL}$ <i>M. vaccae</i> NCTC 11659 + 250 ng/mL LPS | > .1       |
|  | TGFB:IL12B | Within 0 ng/mL                                                                     | BBS vs. 10 $\mu\text{g/mL}$ <i>M. vaccae</i> NCTC 11659                                                                             | > .1       |
|  |            |                                                                                    | BBS vs. 30 $\mu\text{g/mL}$ <i>M. vaccae</i> NCTC 11659                                                                             | 0.01007759 |
|  |            |                                                                                    | BBS vs. 100 $\mu\text{g/mL}$ <i>M. vaccae</i> NCTC 11659                                                                            | < .01      |
|  |            |                                                                                    | BBS vs. 300 $\mu\text{g/mL}$ <i>M. vaccae</i> NCTC 11659                                                                            | < .01      |
|  |            | Within 0.5 ng/mL                                                                   | BBS vs. 10 $\mu\text{g/mL}$ <i>M. vaccae</i> NCTC 11659                                                                             | > .1       |
|  |            |                                                                                    | BBS vs. 30 $\mu\text{g/mL}$ <i>M. vaccae</i> NCTC 11659                                                                             | > .1       |
|  |            |                                                                                    | BBS vs. 100 $\mu\text{g/mL}$ <i>M. vaccae</i> NCTC 11659                                                                            | 0.08479317 |
|  |            |                                                                                    | BBS vs. 300 $\mu\text{g/mL}$ <i>M. vaccae</i> NCTC 11659                                                                            | 0.01243819 |
|  |            | Within 2.5 ng/mL                                                                   | BBS vs. 10 $\mu\text{g/mL}$ <i>M. vaccae</i> NCTC 11659                                                                             | > .1       |
|  |            |                                                                                    | BBS vs. 30 $\mu\text{g/mL}$ <i>M. vaccae</i> NCTC 11659                                                                             | > .1       |
|  |            |                                                                                    | BBS vs. 100 $\mu\text{g/mL}$ <i>M. vaccae</i> NCTC 11659                                                                            | 0.01583241 |
|  |            |                                                                                    | BBS vs. 300 $\mu\text{g/mL}$ <i>M. vaccae</i> NCTC 11659                                                                            | 0.0236974  |
|  |            | Within 250 ng/mL                                                                   | BBS vs. 10 $\mu\text{g/mL}$ <i>M. vaccae</i> NCTC 11659                                                                             | > .1       |
|  |            |                                                                                    | BBS vs. 30 $\mu\text{g/mL}$ <i>M. vaccae</i> NCTC 11659                                                                             | > .1       |
|  |            |                                                                                    | BBS vs. 100 $\mu\text{g/mL}$ <i>M. vaccae</i> NCTC 11659                                                                            | > .1       |
|  |            |                                                                                    | BBS vs. 300 $\mu\text{g/mL}$ <i>M. vaccae</i> NCTC 11659                                                                            | < .01      |
|  |            |                                                                                    | BBS + LPS vehicle vs. BBS + 0.5 ng/mL LPS                                                                                           | 0.01706393 |

|  |                                                                         |                                                                                                               |        |
|--|-------------------------------------------------------------------------|---------------------------------------------------------------------------------------------------------------|--------|
|  | Between all LPS conditions within BBS                                   | BBS + LPS vehicle vs. BBS + 2.5 ng/mL LPS                                                                     | < .01  |
|  |                                                                         | BBS + LPS vehicle vs. BBS + 250 ng/mL LPS                                                                     | < .001 |
|  | Between all LPS conditions within 10 µg/mL <i>M. vaccae</i> NCTC 11659  | 10 µg/mL <i>M. vaccae</i> NCTC 11659 + LPS vehicle vs. 10 µg/mL <i>M. vaccae</i> NCTC 11659 + 0.5 ng/mL LPS   | > .1   |
|  |                                                                         | 10 µg/mL <i>M. vaccae</i> NCTC 11659 + LPS vehicle vs. 10 µg/mL <i>M. vaccae</i> NCTC 11659 + 2.5 ng/mL LPS   | < .01  |
|  |                                                                         | 10 µg/mL <i>M. vaccae</i> NCTC 11659 + LPS vehicle vs. 10 µg/mL <i>M. vaccae</i> NCTC 11659 + 250 ng/mL LPS   | < .001 |
|  | Between all LPS conditions within 30 µg/mL <i>M. vaccae</i> NCTC 11659  | 30 µg/mL <i>M. vaccae</i> NCTC 11659 + LPS vehicle vs. 30 µg/mL <i>M. vaccae</i> NCTC 11659 + 0.5 ng/mL LPS   | > .1   |
|  |                                                                         | 30 µg/mL <i>M. vaccae</i> NCTC 11659 + LPS vehicle vs. 30 µg/mL <i>M. vaccae</i> NCTC 11659 + 2.5 ng/mL LPS   | < .01  |
|  |                                                                         | 30 µg/mL <i>M. vaccae</i> NCTC 11659 + LPS vehicle vs. 30 µg/mL <i>M. vaccae</i> NCTC 11659 + 250 ng/mL LPS   | < .001 |
|  | Between all LPS conditions within 100 µg/mL <i>M. vaccae</i> NCTC 11659 | 100 µg/mL <i>M. vaccae</i> NCTC 11659 + LPS vehicle vs. 100 µg/mL <i>M. vaccae</i> NCTC 11659 + 0.5 ng/mL LPS | > .1   |
|  |                                                                         | 100 µg/mL <i>M. vaccae</i> NCTC 11659 + LPS vehicle vs. 100 µg/mL <i>M. vaccae</i> NCTC 11659 + 2.5 ng/mL LPS | > .1   |
|  |                                                                         | 100 µg/mL <i>M. vaccae</i> NCTC 11659 + LPS vehicle vs. 100 µg/mL <i>M. vaccae</i> NCTC 11659 + 250 ng/mL LPS | < .001 |
|  | Between all LPS conditions within 300 µg/mL <i>M. vaccae</i> NCTC 11659 | 300 µg/mL <i>M. vaccae</i> NCTC 11659 + LPS vehicle vs. 300 µg/mL <i>M. vaccae</i> NCTC 11659 + 0.5 ng/mL LPS | > .1   |

|  |                   |                                       |                                                                                                               |            |
|--|-------------------|---------------------------------------|---------------------------------------------------------------------------------------------------------------|------------|
|  |                   |                                       | 300 µg/mL <i>M. vaccae</i> NCTC 11659 + LPS vehicle vs. 300 µg/mL <i>M. vaccae</i> NCTC 11659 + 2.5 ng/mL LPS | > .1       |
|  |                   |                                       | 300 µg/mL <i>M. vaccae</i> NCTC 11659 + LPS vehicle vs. 300 µg/mL <i>M. vaccae</i> NCTC 11659 + 250 ng/mL LPS | < .01      |
|  | <i>TGFB:IL23A</i> | Within 0 ng/mL                        | BBS vs. 10 µg/mL <i>M. vaccae</i> NCTC 11659                                                                  | > .1       |
|  |                   |                                       | BBS vs. 30 µg/mL <i>M. vaccae</i> NCTC 11659                                                                  | > .1       |
|  |                   |                                       | BBS vs. 100 µg/mL <i>M. vaccae</i> NCTC 11659                                                                 | < .01      |
|  |                   |                                       | BBS vs. 300 µg/mL <i>M. vaccae</i> NCTC 11659                                                                 | < .01      |
|  |                   | Within 0.5 ng/mL                      | BBS vs. 10 µg/mL <i>M. vaccae</i> NCTC 11659                                                                  | > .1       |
|  |                   |                                       | BBS vs. 30 µg/mL <i>M. vaccae</i> NCTC 11659                                                                  | > .1       |
|  |                   |                                       | BBS vs. 100 µg/mL <i>M. vaccae</i> NCTC 11659                                                                 | > .1       |
|  |                   |                                       | BBS vs. 300 µg/mL <i>M. vaccae</i> NCTC 11659                                                                 | > .1       |
|  |                   | Within 2.5 ng/mL                      | BBS vs. 10 µg/mL <i>M. vaccae</i> NCTC 11659                                                                  | > .1       |
|  |                   |                                       | BBS vs. 30 µg/mL <i>M. vaccae</i> NCTC 11659                                                                  | > .1       |
|  |                   |                                       | BBS vs. 100 µg/mL <i>M. vaccae</i> NCTC 11659                                                                 | 0.02776241 |
|  |                   |                                       | BBS vs. 300 µg/mL <i>M. vaccae</i> NCTC 11659                                                                 | 0.03448704 |
|  |                   | Within 250 ng/mL                      | BBS vs. 10 µg/mL <i>M. vaccae</i> NCTC 11659                                                                  | > .1       |
|  |                   |                                       | BBS vs. 30 µg/mL <i>M. vaccae</i> NCTC 11659                                                                  | > .1       |
|  |                   |                                       | BBS vs. 100 µg/mL <i>M. vaccae</i> NCTC 11659                                                                 | 0.0724892  |
|  |                   |                                       | BBS vs. 300 µg/mL <i>M. vaccae</i> NCTC 11659                                                                 | < .01      |
|  |                   | Between all LPS conditions within BBS | BBS + LPS vehicle vs. BBS + 0.5 ng/mL LPS                                                                     | < .01      |
|  |                   |                                       | BBS + LPS vehicle vs. BBS + 2.5 ng/mL LPS                                                                     | < .001     |
|  |                   |                                       | BBS + LPS vehicle vs. BBS + 250 ng/mL LPS                                                                     | < .001     |

|  |  |                                                                                    |                                                                                                                                     |        |
|--|--|------------------------------------------------------------------------------------|-------------------------------------------------------------------------------------------------------------------------------------|--------|
|  |  | Between all LPS conditions within 10 $\mu\text{g/mL}$ <i>M. vaccae</i> NCTC 11659  | 10 $\mu\text{g/mL}$ <i>M. vaccae</i> NCTC 11659 + LPS vehicle vs. 10 $\mu\text{g/mL}$ <i>M. vaccae</i> NCTC 11659 + 0.5 ng/mL LPS   | > .1   |
|  |  |                                                                                    | 10 $\mu\text{g/mL}$ <i>M. vaccae</i> NCTC 11659 + LPS vehicle vs. 10 $\mu\text{g/mL}$ <i>M. vaccae</i> NCTC 11659 + 2.5 ng/mL LPS   | < .01  |
|  |  |                                                                                    | 10 $\mu\text{g/mL}$ <i>M. vaccae</i> NCTC 11659 + LPS vehicle vs. 10 $\mu\text{g/mL}$ <i>M. vaccae</i> NCTC 11659 + 250 ng/mL LPS   | < .001 |
|  |  | Between all LPS conditions within 30 $\mu\text{g/mL}$ <i>M. vaccae</i> NCTC 11659  | 30 $\mu\text{g/mL}$ <i>M. vaccae</i> NCTC 11659 + LPS vehicle vs. 30 $\mu\text{g/mL}$ <i>M. vaccae</i> NCTC 11659 + 0.5 ng/mL LPS   | > .1   |
|  |  |                                                                                    | 30 $\mu\text{g/mL}$ <i>M. vaccae</i> NCTC 11659 + LPS vehicle vs. 30 $\mu\text{g/mL}$ <i>M. vaccae</i> NCTC 11659 + 2.5 ng/mL LPS   | < .001 |
|  |  |                                                                                    | 30 $\mu\text{g/mL}$ <i>M. vaccae</i> NCTC 11659 + LPS vehicle vs. 30 $\mu\text{g/mL}$ <i>M. vaccae</i> NCTC 11659 + 250 ng/mL LPS   | < .001 |
|  |  | Between all LPS conditions within 100 $\mu\text{g/mL}$ <i>M. vaccae</i> NCTC 11659 | 100 $\mu\text{g/mL}$ <i>M. vaccae</i> NCTC 11659 + LPS vehicle vs. 100 $\mu\text{g/mL}$ <i>M. vaccae</i> NCTC 11659 + 0.5 ng/mL LPS | > .1   |
|  |  |                                                                                    | 100 $\mu\text{g/mL}$ <i>M. vaccae</i> NCTC 11659 + LPS vehicle vs. 100 $\mu\text{g/mL}$ <i>M. vaccae</i> NCTC 11659 + 2.5 ng/mL LPS | > .1   |
|  |  |                                                                                    | 100 $\mu\text{g/mL}$ <i>M. vaccae</i> NCTC 11659 + LPS vehicle vs. 100 $\mu\text{g/mL}$ <i>M. vaccae</i> NCTC 11659 + 250 ng/mL LPS | < .01  |
|  |  | Between all LPS conditions within 300 $\mu\text{g/mL}$ <i>M. vaccae</i> NCTC 11659 | 300 $\mu\text{g/mL}$ <i>M. vaccae</i> NCTC 11659 + LPS vehicle vs. 300 $\mu\text{g/mL}$ <i>M. vaccae</i> NCTC 11659 + 0.5 ng/mL LPS | > .1   |
|  |  |                                                                                    | 300 $\mu\text{g/mL}$ <i>M. vaccae</i> NCTC 11659 + LPS vehicle vs. 300 $\mu\text{g/mL}$ <i>M. vaccae</i> NCTC 11659 + 2.5 ng/mL LPS | > .1   |

|  |  |  |                                                                                                               |       |
|--|--|--|---------------------------------------------------------------------------------------------------------------|-------|
|  |  |  | 300 µg/mL <i>M. vaccae</i> NCTC 11659 + LPS vehicle vs. 300 µg/mL <i>M. vaccae</i> NCTC 11659 + 250 ng/mL LPS | < .01 |
|--|--|--|---------------------------------------------------------------------------------------------------------------|-------|

**Table S11.** Primers used for real time RT-PCR listed from 5' to 3'.

| Gene         | Forward Primer          | Reverse Primer           | Sequence Name          |
|--------------|-------------------------|--------------------------|------------------------|
| <i>ACTB</i>  | GGACCTGACTGACTACCTCAT   | CGTAGCACAGCTTCTCCTTAAT   | ACC#<br>NM_001101.3    |
| <i>IL10</i>  | GCTGGAGGACTTTAAGGGTTAC  | GATGTCTGGGTCTTGGTTCTC    | ACC#<br>NM_000572.3    |
| <i>IL12A</i> | CCAGAAGAATGAGAGTTGCCTAA | GGCACAGGGCCATCATAAA      | ACC#<br>NM_001354583.2 |
| <i>IL12B</i> | CACATTCTACTTCTCCCTGAC   | GTCCGTGAAGACTCTATCTTTCTT | ACC#<br>AF180563.1     |
| <i>IL23A</i> | AGAGAAGAGGGAGATGAAGAGA  | CCTTTGCAAGCAGAACTGAC     | ACC#<br>NM_016584.3    |
| <i>TGFB1</i> | GTAAGAAGCACGAGCTGTATGT  | GCGTTCATGTAGGAGTTCAGAG   | ACC#<br>M60316.1       |

#### S4. Supplemental References

##### References

- Grohmann, U.; Belladonna, M.L.; Vacca, C.; Bianchi, R.; Fallarino, F.; Orabona, C.; Fioretti, M.C.; Puccetti, P. Positive regulatory role of IL-12 in macrophages and modulation by IFN-gamma. *J. Immunol.* **2001**, *167*, 221–227. <https://doi.org/10.4049/jimmunol.167.1.221>.
- Ma, X.; Chow, J.M.; Gri, G.; Carra, G.; Gerosa, F.; Wolf, S.F.; Dzialo, R.; Trinchieri, G. The interleukin 12 p40 gene promoter is primed by interferon gamma in monocytic cells. *J. Exp. Med.* **1996**, *183*, 147–157. <https://doi.org/10.1084/jem.183.1.147>.
- Ma, X.; Yan, W.; Zheng, H.; Du, Q.; Zhang, L.; Ban, Y.; Li, N.; Wei, F. Regulation of IL-10 and IL-12 production and function in macrophages and dendritic cells. *F1000Res* **2015**, *4*. <https://doi.org/10.12688/f1000research.7010.1>.
- Mantovani, A.; Sica, A.; Sozzani, S.; Allavena, P.; Vecchi, A.; Locati, M. The chemokine system in diverse forms of macrophage activation and polarization. *Trends Immunol.* **2004**, *25*, 677–686. <https://doi.org/10.1016/j.it.2004.09.015>.
- Viola, A.; Munari, F.; Sánchez-Rodríguez, R.; Scolari, T.; Castegna, A. The metabolic signature of macrophage responses. *Front. Immunol.* **2019**, *10*, 1462. <https://doi.org/10.3389/fimmu.2019.01462>.
