# Supplementary material for: Mycobacterium vaccae NCTC 11659, a Soil-Derived Bacterium with Stress Resilience Properties, Modulates the Proinflammatory Effects of LPS in Macrophages
Source: Int J Mol Sci. 2023 Mar 8;24(6):5176. doi: 10.3390/ijms24065176 (PMC10049321; doi:10.3390/ijms24065176)
Supplement: Supplementary file 1 [file ijms-24-05176-s001.zip]

Archive with 4 entries (4 files):
- Data_022123_EH.xlsx
- Ratio calculation example_101222_EH.pdf
- Ratio calculation example_101222_EH.xlsx
- Supplemental S1.qPCR THP-1 supplementary materials_proofs_022123_EH_CAL_AAC2.pdf
