# Supplementary material for: Mycobacterium vaccae NCTC 11659, a Soil-Derived Bacterium with Stress Resilience Properties, Modulates the Proinflammatory Effects of LPS in Macrophages
Source: Int J Mol Sci. 2023 Mar 8;24(6):5176. doi: 10.3390/ijms24065176 (PMC10049321; doi:10.3390/ijms24065176)
Supplement: Supplementary file 1 [file ijms-24-05176-s001.zip › Data_022123_EH.xlsx]

## Sheet: RT-PCR data
IL10:IL12A
	RPMI 1640								0.5								2.5								250
BBS					3.02323		2.50227		2.75922		3.42625	3.61698	3.32008	3.31086	3.49338	3.31489	3.03197	2.88292	2.94097	3.19138		3.33942	2.95705	3.25743		2.2141	2.44548	2.02631			2.87033
10				3.36837					3.29468	3.29388	3.24159	3.03089	3.01892	3.2029	3.4551	3.15263	3.65018	2.95523		2.92535	3.66734	3.69167	3.10104	3.73275	2.27712	2.02208	2.31399	2.59215	2.80411	2.54643	2.82582	2.54728
30				2.84836		2.34575		2.89212	3.12448	2.99561	3.10603	3.23058	3.14973	3.24227	3.08429	3.46847	2.93524	2.42196	2.60984	2.67116	3.97963	2.93933	3.50922	3.25347	2.39116	2.56478	2.21938	2.51627	2.796	2.55832	2.82845
100		3.09702		2.78972		3.1695	3.19359		2.77228	2.76319	2.65159	2.72567	2.91864	3.15484	2.92356	2.78182	2.8142	2.94308	2.50258	2.81193	3.31969	3.00246	3.02915	3.4392	2.30561	2.26991	2.22487	2.90817	2.86751	3.35248	2.83361	2.93597
300		3.07972						3.4485	2.91816	2.79285	2.66058	2.38948	3.11484	3.04373	3.21016	2.95359	2.97279	2.93026	2.76988	2.6422	3.60674	3.09279	3.66313		2.31519	2.45436	2.37235	2.3651	2.44812	2.90184		2.90971
IL10:IL12B
	RPMI 1640								0.5								2.5								250
BBS	3.20987				3.13949			3.33882	2.43821	2.3452	2.75374	3.19169	2.80005	2.90515	2.86987	3.08187	1.94741	2.41008	1.31862	2.03052	1.85243	1.96812	2.05403	2.07054	-0.31702	-0.306136	-0.272486	-0.355968	0.101593	0.1929	0.23521
10					3.41813	3.41381			2.82575	2.54917	2.74472	2.8474	2.83509	3.0275	3.10682	3.31709	2.33203	2.48808	1.80542	2.07155	2.78062	2.40609	2.4528	2.08994	-0.186681	-0.0534996	-0.195973	-0.131864	0.38594	0.379344	0.299113	0.419193
30			1.94317	2.53843	2.16483		2.80356	2.70229	2.82509	2.74147	2.54519	2.36713	2.92193	2.64095	2.80191	2.16206	2.37683	2.57887	2.21428	2.26514	2.43629	2.28113	2.25723	2.49552	-0.0471196	0.0489589	-0.0787894	-0.1476	0.445108	0.587347	0.533094	0.417801
100	2.03672	2.1306	2.37743	1.99669	2.69323	2.24536	2.39895	2.2292	1.79112	2.33943	2.23404	1.71465	2.42095	2.32322	2.29686	1.8965	1.84644	2.23175	1.5217	1.91589	2.11968	2.468	2.1537	2.30893	0.358048	0.0594468	0.09122	0.110715	0.429972	0.558511	0.584848	0.516761
300		1.67806	1.74654			1.91243		1.83551	1.84392	2.05376	1.6344	1.82003	1.83005	1.82409	1.75829	1.62155	1.79637	1.879	1.6314	1.7293	1.87562		2.21878	2.1285	0.416453	0.388589	0.249879	-0.0266503	0.624897	0.658092	0.940599	0.571037
IL10:IL23A
	RPMI 1640								0.5								2.5								250
BBS	-0.504039	-0.510471	-1.055	-0.738811	-0.0657508	-0.16222	-0.250494	-0.129018	-0.70227	-0.817093	-0.466035	-0.6173	-0.599782	-0.584265	-0.56455	-0.612648	-0.870698	-0.687948	-0.851509	-0.768588	-0.9142	-0.973285	-0.985938	-1.04455	-2.29054	-2.05629	-2.00414	-2.06766	-1.66507	-1.92839	-1.76187	-1.89224
10	-1.01091	-0.7993	-0.666145	-0.538235	-0.309081	-0.20217		-0.41605	-0.613064	-0.490001	-0.55571	-0.520918	-0.442197	-0.445176	-0.402558	-0.515014	-0.796247	-0.714371	-0.796563	-0.75737	-0.872236	-0.861497	-0.910339	-0.927617	-2.01014	-1.9816	-2.00469	-2.0392	-1.60503	-1.73922	-1.74218	-1.66968
30	-1.19671	-0.802299	-0.645711	-0.586482	-0.664595	-0.563818	-0.496173	-0.289258	-0.606513	-0.569105	-0.60546	-0.539087	-0.501924	-0.513323	-0.459974	-0.458976	-0.705432	-0.59317	-0.678997	-0.740958	-0.816181	-0.666732	-0.886235	-0.831491	-1.97421	-1.88827	-1.942	-1.79335	-1.61729	-1.45128	-1.54462	-1.5475
100	-1.01747	-0.848172	-0.782187	-0.781132	-0.51831	-0.818724	-0.833629	-0.748934	-0.961551	-0.93589	-0.787777	-1.01769	-0.794856	-0.781644	-0.779049	-0.903599	-0.976449	-0.897405	-0.929568	-0.885337	-1.09474	-0.963164	-0.998056	-1.0208	-1.7944	-1.81801	-1.74759	-1.7523	-1.68285	-1.62621	-1.48181	-1.55797
300	-1.06978	-0.993179	-1.06953	-1.08029	-1.05696	-1.02363	-1.23318	-1.02959	-1.10146	-1.07741	-0.975357	-1.07264	-0.961202	-1.01786	-0.933764	-1.0323	-1.11289	-1.07522	-1.1145	-1.07552	-1.20974	-1.15352	-1.15671	-1.12678	-1.75765	-1.7366	-1.74303	-1.80437	-1.6883	-1.7407	-1.63172	-1.60574

## Sheet: NanoString data
File Name			BBS_RPMI_1	BBS_RPMI_2	BBS_RPMI_3	BBS_RPMI_4	BBS_RPMI_5	BBS_RPMI_6	30_RPMI_1	30_RPMI_2	30_RPMI_3	30_RPMI_4	30_RPMI_5	30_RPMI_6	300_RPMI_1	300_RPMI_2	300_RPMI_3	BBS_LPS_1	BBS_LPS_2	BBS_LPS_3	30_LPS_1	30_LPS_2	30_LPS_3	300_LPS_1	300_LPS_2	300_LPS_3	300_RPMI_4	300_RPMI_5	300_RPMI_6	BBS_LPS_4	BBS_LPS_5	30_LPS_4	30_LPS_5	30_LPS_6	300_LPS_4	300_LPS_5	300_LPS_6
Description
Sample ID			Sample01	Sample02	Sample03	Sample04	Sample05	Sample06	Sample07	Sample08	Sample09	Sample10	Sample11	Sample12	Sample01	Sample02	Sample03	Sample04	Sample05	Sample06	Sample07	Sample08	Sample09	Sample10	Sample11	Sample12	Sample01	Sample02	Sample03	Sample04	Sample05	Sample07	Sample08	Sample09	Sample10	Sample11	Sample12
Owner			Administrator	Administrator	Administrator	Administrator	Administrator	Administrator	Administrator	Administrator	Administrator	Administrator	Administrator	Administrator	Administrator	Administrator	Administrator	Administrator	Administrator	Administrator	Administrator	Administrator	Administrator	Administrator	Administrator	Administrator	Administrator	Administrator	Administrator	Administrator	Administrator	Administrator	Administrator	Administrator	Administrator	Administrator	Administrator
Sample Date			2021-03-10	2021-03-10	2021-03-10	2021-03-10	2021-03-10	2021-03-10	2021-03-10	2021-03-10	2021-03-10	2021-03-10	2021-03-10	2021-03-10	2021-03-30	2021-03-30	2021-03-30	2021-03-30	2021-03-30	2021-03-30	2021-03-30	2021-03-30	2021-03-30	2021-03-30	2021-03-30	2021-03-30	2021-04-01	2021-04-01	2021-04-01	2021-04-01	2021-04-01	2021-04-01	2021-04-01	2021-04-01	2021-04-01	2021-04-01	2021-04-01
File Version			2	2	2	2	2	2	2	2	2	2	2	2	2	2	2	2	2	2	2	2	2	2	2	2	2	2	2	2	2	2	2	2	2	2	2
Gene RLF			NS_INFL_HS_V2_C2534	NS_INFL_HS_V2_C2534	NS_INFL_HS_V2_C2534	NS_INFL_HS_V2_C2534	NS_INFL_HS_V2_C2534	NS_INFL_HS_V2_C2534	NS_INFL_HS_V2_C2534	NS_INFL_HS_V2_C2534	NS_INFL_HS_V2_C2534	NS_INFL_HS_V2_C2534	NS_INFL_HS_V2_C2534	NS_INFL_HS_V2_C2534	NS_INFL_HS_V2_C2534	NS_INFL_HS_V2_C2534	NS_INFL_HS_V2_C2534	NS_INFL_HS_V2_C2534	NS_INFL_HS_V2_C2534	NS_INFL_HS_V2_C2534	NS_INFL_HS_V2_C2534	NS_INFL_HS_V2_C2534	NS_INFL_HS_V2_C2534	NS_INFL_HS_V2_C2534	NS_INFL_HS_V2_C2534	NS_INFL_HS_V2_C2534	NS_INFL_HS_V2_C2534	NS_INFL_HS_V2_C2534	NS_INFL_HS_V2_C2534	NS_INFL_HS_V2_C2534	NS_INFL_HS_V2_C2534	NS_INFL_HS_V2_C2534	NS_INFL_HS_V2_C2534	NS_INFL_HS_V2_C2534	NS_INFL_HS_V2_C2534	NS_INFL_HS_V2_C2534	NS_INFL_HS_V2_C2534
Comments			Default Run	Default Run	Default Run	Default Run	Default Run	Default Run	Default Run	Default Run	Default Run	Default Run	Default Run	Default Run	Default Run	Default Run	Default Run	Default Run	Default Run	Default Run	Default Run	Default Run	Default Run	Default Run	Default Run	Default Run	Default Run	Default Run	Default Run	Default Run	Default Run	Default Run	Default Run	Default Run	Default Run	Default Run	Default Run
Lane ID			1	2	3	4	5	6	7	8	9	10	11	12	1	2	3	4	5	6	7	8	9	10	11	12	1	2	3	4	5	7	8	9	10	11	12
FOV Count			194	194	194	194	194	194	194	194	194	194	194	194	194	194	194	194	194	194	194	194	194	194	194	194	194	194	194	194	194	194	194	194	194	194	194
FOV Counted			194	194	192	194	193	193	194	194	194	194	193	194	194	194	194	191	194	194	194	193	194	194	194	194	194	194	194	194	194	193	194	194	194	194	194
Scanner ID			1604P0079	1604P0079	1604P0079	1604P0079	1604P0079	1604P0079	1604P0079	1604P0079	1604P0079	1604P0079	1604P0079	1604P0079	1604P0079	1604P0079	1604P0079	1604P0079	1604P0079	1604P0079	1604P0079	1604P0079	1604P0079	1604P0079	1604P0079	1604P0079	1604P0079	1604P0079	1604P0079	1604P0079	1604P0079	1604P0079	1604P0079	1604P0079	1604P0079	1604P0079	1604P0079
Stage Position			1	1	1	1	1	1	1	1	1	1	1	1	1	1	1	1	1	1	1	1	1	1	1	1	1	1	1	1	1	1	1	1	1	1	1
Binding Density			0.22	0.22	0.2	0.21	0.19	0.22	0.14	0.21	0.2	0.25	0.27	0.23	0.24	0.23	0.15	0.2	0.21	0.18	0.11	0.17	0.12	0.25	0.19	0.28	0.16	0.23	0.23	0.2	0.3	0.14	0.19	0.15	0.27	0.34	0.3
Messages
Positive	POS_A	ERCC_00117.1	39936	38691	37517	35174	46928	48084	41010	34478	30353	51423	48057	37152	32650	38903	20795	35056	50796	34503	16559	34523	21483	37496	32036	33161	33215	38920	44977	46631	53973	28825	43971	32568	41804	39182	41245
Positive	POS_B	ERCC_00112.1	9322	9555	9291	8846	10973	11381	10294	8305	7775	12442	11402	8139	7645	9511	4846	8186	11717	8039	3985	8217	5184	8762	7666	7769	7502	8998	10572	10618	11989	6495	9401	7672	9656	8749	9067
Positive	POS_C	ERCC_00002.1	3448	3105	2990	2882	3844	3908	3260	2991	2366	4235	3910	3028	2588	3007	1616	2634	3988	2614	1297	2683	1684	2916	2599	2558	2649	3030	3654	3661	4135	2209	3183	2607	3266	3061	3278
Positive	POS_D	ERCC_00092.1	772	744	714	671	904	984	822	696	601	1034	948	830	630	780	374	690	955	633	344	614	440	669	564	653	564	719	889	878	996	563	792	637	713	749	750
Positive	POS_E	ERCC_00035.1	142	164	137	133	172	187	162	123	133	172	194	179	131	170	72	144	186	136	77	117	76	137	115	146	130	145	183	153	225	124	173	158	168	163	157
Positive	POS_F	ERCC_00034.1	64	61	62	56	81	84	54	52	50	80	78	73	64	90	43	53	73	83	28	81	35	65	68	48	57	58	68	77	80	54	75	53	57	79	65
Negative	NEG_A	ERCC_00096.1	8	11	11	4	9	8	7	6	4	6	9	12	10	2	10	10	9	7	5	3	8	8	4	7	8	10	7	15	12	8	7	5	8	6	7
Negative	NEG_B	ERCC_00041.1	7	3	11	5	10	6	4	6	4	9	7	9	8	11	3	7	7	8	2	8	2	7	3	7	1	5	11	6	12	4	5	9	10	13	7
Negative	NEG_C	ERCC_00019.1	12	6	7	9	16	13	10	3	8	13	8	12	10	12	7	5	12	15	7	7	5	10	12	7	10	4	9	7	10	7	12	10	7	8	8
Negative	NEG_D	ERCC_00076.1	8	8	13	9	14	8	6	6	6	5	8	8	6	4	6	10	12	5	2	6	1	6	2	3	3	6	8	9	13	7	8	6	5	8	12
Negative	NEG_E	ERCC_00098.1	18	13	12	7	20	9	13	4	6	13	14	11	13	11	9	10	16	6	6	8	4	12	9	13	12	9	15	17	9	8	8	4	7	12	12
Negative	NEG_F	ERCC_00126.1	10	8	7	4	11	9	6	7	7	11	7	9	12	9	3	10	11	5	9	5	4	6	6	5	13	9	11	9	10	6	11	5	9	7	11
Negative	NEG_G	ERCC_00144.1	2	8	6	3	2	3	2	5	3	5	2	2	5	4	3	2	8	1	1	4	1	4	2	1	1	3	1	3	6	1	1	2	4	1	2
Negative	NEG_H	ERCC_00154.1	9	7	5	2	6	7	6	2	4	10	11	8	3	5	6	5	9	1	1	7	5	3	7	5	3	2	6	3	1	4	9	2	10	3	5
Endogenous	AGER	NM_001136.3	62.9989	51.7634	52.6401	62.4337	59.0369	54.1949	0.278448	0.30062	0.291838	0.31942	0.331129	0.263734	2.12104	2.19218	1.96704	35.034	34.5494	39.6271	20	20	20	3.91221	4.27314	4.32278	1.99263	2.08074	2.11214	36.2355	35.8972	20	20	20	3.44021	4.40338	3.79598
Endogenous	ALOX12	NM_000697.1	20	20	20	20	20	20	20	20	20	20	20	20	20	20	20	20	20	20	20	20	20	20	20	20	20	20	20	20	20	20	20	20	20	20	20
Endogenous	ALOX15	NM_001140.3	20	20	20	20	20	20	20	20	20	20	20	20	20	20	20	20	20	20	20	20	20	20	20	20	20	20	20	20	20	20	20	20	20	20	20
Endogenous	ALOX5	NM_000698.2	0.627664	0.648382	0.744052	0.616019	0.611299	0.699755	1.46445	1.37511	1.40225	1.32843	1.4117	1.44724	1.94093	1.80308	1.95768	0.196907	0.172346	0.192115	0.767871	0.763191	0.761998	0.881851	0.801806	0.82589	1.92351	1.91734	1.86195	0.187169	0.191382	0.790092	0.766499	0.805489	0.831735	0.848434	0.852279
Endogenous	AREG	NM_001657.2	6.88172	8.11875	7.06945	7.23633	7.40901	7.79523	13.7425	13.8215	13.1832	13.1215	12.7716	14.0926	15.8685	17.1134	16.9131	10.1827	10.4849	9.63098	20	20	20	16.167	16.5585	16.3594	17.1473	16.5286	16.9539	10.138	10.1362	20	20	20	15.9808	16.5853	16.0846
Endogenous	ARG1	NM_000045.2	20	20	20	20	20	20	20	20	20	20	20	20	20	20	20	20	20	20	20	20	20	21.6133	21.1857	21.3779	20	20	20	20	20	20	20	20	21.4835	21.3439	21.5464
Endogenous	ATF2	NM_001880.2	1.03198	0.99362	1.13297	0.970849	1.00776	0.960541	1.0838	1.07926	1.06745	1.11114	1.10332	1.05927	0.899761	0.947733	0.90302	0.865032	0.902908	0.820301	0.794853	0.771013	0.663227	0.534981	0.609845	0.556705	0.912131	0.897409	0.929553	0.857892	0.858008	0.902529	0.694921	0.829707	0.597444	0.566209	0.554832
Endogenous	BCL2L1	NM_138578.1	0.668099	0.64732	0.640578	0.67733	0.658604	0.672521	0.498629	0.495651	0.478229	0.49743	0.471352	0.500478	0.723688	0.815176	0.7434	0.540578	0.517093	0.564837	0.59631	0.560209	0.524234	0.236349	0.182522	0.2289	0.760048	0.746752	0.781371	0.541173	0.542282	0.622035	0.568861	0.508496	0.182459	0.212127	0.220806
Endogenous	BCL6	NM_001706.2	0.705845	0.701345	0.702073	0.70119	0.706705	0.689917	1.00739	1.01489	1.09712	1.06154	1.02169	1.03822	0.722363	0.648976	0.686152	0.618539	0.634151	0.614126	0.194772	0.20155	0.193602	0.423856	0.47773	0.444385	0.673385	0.696914	0.667627	0.621621	0.619869	0.198708	0.186256	0.216138	0.457984	0.450114	0.435952
Endogenous	BIRC2	NM_001166.3	4.46474	4.33322	4.67429	4.3018	4.39708	4.23512	0.926526	0.911899	0.912029	0.898245	0.946897	0.908877	3.90881	3.46868	3.87697	1.96275	2.02592	1.90751	1.39037	1.38103	1.33744	0.819054	0.6897	0.779463	3.77463	3.81012	3.62851	1.9586	1.95646	1.39841	1.35305	1.33295	0.754918	0.734241	0.803795
Endogenous	C1QA	NM_015991.2	0.900282	0.882251	1.11821	0.856428	0.847367	0.976143	0.379273	0.360276	0.359612	0.349681	0.38335	0.365089	0.582279	0.537048	0.568828	2.3983	2.03153	2.34737	20	20	20	2.53379	1.98803	2.19452	0.553091	0.582412	0.541973	2.25319	2.31593	20	20	20	2.62517	2.06212	2.54597
Endogenous	C1QB	NM_000491.3	20	20	20	20	20	20	36.6121	37.7562	35.86	37.2715	35.454	37.1301	8.2474	8.23597	8.13925	20	20	20	20	20	20	18.1927	17.8696	17.7099	8.10146	8.34776	8.13901	20	20	20	20	20	18.771	17.7573	18.2892
Endogenous	C1R	NM_001733.4	20	20	20	20	20	20	20	20	20	20	20	20	20	20	20	20	20	20	20	20	20	14.9647	14.5496	14.7895	20	20	20	20	20	20	20	20	14.4321	14.9012	14.7446
Endogenous	C1S	NM_001734.2	2.69296	2.7748	2.77553	2.722	2.70307	2.8397	20	20	20	20	20	20	20	20	20	2.402	2.30562	2.39852	1.10519	1.10819	1.07007	0.189263	0.241582	0.21153	20	20	20	2.37255	2.38656	1.15713	1.0677	1.19482	0.197237	0.226397	0.19178
Endogenous	C2	NM_000063.3	0.655958	0.665975	0.661277	0.642888	0.668229	0.6209	1.09023	1.07501	1.11517	1.09469	1.08214	1.09975	0.727585	0.71541	0.724687	0.528433	0.58179	0.503687	0.694389	0.694855	0.585308	1.02076	1.09988	1.07318	0.723443	0.719316	0.7215	0.535464	0.530615	0.723809	0.594899	0.633845	1.07274	1.05061	1.04951
Endogenous	C3	NM_000064.2	1.10718	1.13361	1.12174	1.09556	1.12636	1.08042	1.79399	1.788	1.739	1.75724	1.76855	1.7823	3.52235	3.50346	3.57392	1.08993	1.16087	1.04984	1.4004	1.39605	1.39015	1.06072	1.00132	1.05374	3.56638	3.5222	3.52985	1.09756	1.09159	1.40559	1.39583	1.39315	1.06029	1.00407	1.07156
Endogenous	C3AR1	NM_004054.2	0.203568	0.154549	0.205862	0.177344	0.181937	0.149521	0.3468	0.325237	0.320574	0.335114	0.32522	0.336838	0.33502	0.402265	0.355135	0.26225	0.286312	0.264589	0.360627	0.365816	0.383647	0.179744	0.153389	0.164781	0.372474	0.331673	0.388718	0.267287	0.264487	0.367145	0.374491	0.414044	0.177664	0.159609	0.178169
Endogenous	C4A	NM_007293.2	20	20	20	20	20	20	20	20	20	20	20	20	20	20	20	20	20	20	20	20	20	5.60363	6.27865	6.20655	20	20	20	20	20	20	20	20	5.14354	6.31787	5.51357
Endogenous	C5	NM_001735.2	9.06059	8.50933	9.0743	8.57507	8.95126	7.87476	0.926241	0.945764	0.854139	0.95095	0.885694	0.911068	0.883108	1.29683	1.0066	6.48648	7.30926	6.22959	20	20	20	20	20	20	1.09202	0.955114	1.17008	6.6176	6.53599	20	20	20	20	20	20
Endogenous	C6	NM_000065.2	20	20	20	20	20	20	20	20	20	20	20	20	20	20	20	20	20	20	20	20	20	20	20	20	20	20	20	20	20	20	20	20	20	20	20
Endogenous	C7	NM_000587.2	20	20	20	20	20	20	20	20	20	20	20	20	20	20	20	20	20	20	20	20	20	20	20	20	20	20	20	20	20	20	20	20	20	20	20
Endogenous	C8A	NM_000562.2	20	20	20	20	20	20	20	20	20	20	20	20	20	20	20	20	20	20	20	20	20	20	20	20	20	20	20	20	20	20	20	20	20	20	20
Endogenous	C8B	NM_000066.2	20	20	20	20	20	20	20	20	20	20	20	20	20	20	20	20	20	20	20	20	20	20	20	20	20	20	20	20	20	20	20	20	20	20	20
Endogenous	C9	NM_001737.3	20	20	20	20	20	20	20	20	20	20	20	20	20	20	20	20	20	20	20	20	20	20	20	20	20	20	20	20	20	20	20	20	20	20	20
Endogenous	CCL11	NM_002986.2	20	20	20	20	20	20	20	20	20	20	20	20	20	20	20	20	20	20	20	20	20	20	20	20	20	20	20	20	20	20	20	20	20	20	20
Endogenous	CCL13	NM_005408.2	1.3786	1.37461	1.3268	1.38611	1.39	1.34827	20	20	20	20	20	20	20	20	20	0.92768	0.958247	0.931091	0.343293	0.346389	0.347314	0.136977	0.121614	0.127489	20	20	20	0.938578	0.933695	0.34279	0.34343	0.352389	0.138051	0.124512	0.136644
Endogenous	CCL16	NM_004590.2	20	20	20	20	20	20	20	20	20	20	20	20	20	20	20	20	20	20	20	20	20	20	20	20	20	20	20	20	20	20	20	20	20	20	20
Endogenous	CCL17	NM_002987.2	20	20	20	20	20	20	20	20	20	20	20	20	20	20	20	20	20	20	19.6043	19.582	19.7952	7.99936	7.54717	7.46935	20	20	20	20	20	19.5203	19.8037	19.5753	8.06849	7.71427	7.88225
Endogenous	CCL19	NM_006274.2	1.85972	1.95316	1.87622	1.92239	1.88123	2.03684	0.965248	1.03495	1.03215	1.07781	1.0521	0.965635	1.94746	1.81035	1.81717	1.66295	1.5535	1.69013	0.431307	0.396848	0.381942	0.98456	1.03334	1.01307	1.7721	1.95848	1.78568	1.64079	1.65343	0.45461	0.423547	0.365683	0.905013	1.06899	0.950891
Endogenous	CCL2	NM_002982.3	0.308602	0.465929	0.417074	0.333812	0.351173	0.466223	0.159092	0.166525	0.137776	0.148925	0.178256	0.144289	0.881297	0.944935	0.854813	4.24882	3.84673	3.58775	1.29662	1.32752	1.39679	0.546346	0.439246	0.505546	0.827959	1.01351	0.844844	3.93056	4.04506	1.21776	1.3544	1.26814	0.535281	0.457553	0.549411
Endogenous	CCL20	NM_004591.1	1.07534	1.28007	1.1692	1.14298	1.13539	1.32797	0.539866	0.554784	0.50629	0.519347	0.546369	0.529026	1.11265	1.14763	1.12787	2.8241	2.58447	2.73548	1.15672	1.12497	1.07784	1.96445	1.96276	1.91132	1.11917	1.17422	1.11438	2.73318	2.77335	1.22368	1.11685	1.16038	1.8832	2.02889	1.90426
Endogenous	CCL21	NM_002989.2	13.7195	12.0348	12.9312	13.235	13.0815	12.0954	17.3	16.83	18.2096	17.4064	16.9565	17.7131	15.9066	14.8856	15.8814	12.0026	12.2436	12.5234	20	20	20	20	20	20	15.8632	15.1151	15.5962	12.2043	12.1302	20	20	20	20	20	20
Endogenous	CCL22	NM_002990.3	0.742374	0.535786	0.63521	0.675454	0.663168	0.530073	7.49855	6.93796	7.3061	6.92136	7.21538	7.414	0.402139	0.392436	0.406466	3.23828	3.52023	3.56072	1.26085	1.2212	1.19124	2.41182	2.63068	2.53498	0.412656	0.373704	0.411323	3.3984	3.33439	1.27079	1.24186	1.13633	2.30622	2.64297	2.37224
Endogenous	CCL23	NM_145898.1	0.343383	0.400185	0.33827	0.373696	0.364995	0.413469	0.275404	0.291987	0.277616	0.281628	0.28908	0.275508	0.356833	0.279448	0.33211	0.810034	0.756779	0.815957	2.61994	2.66806	2.54246	0.105967	0.129224	0.112778	0.316803	0.340957	0.301218	0.800318	0.806206	2.66558	2.4973	2.72997	0.11953	0.118308	0.109809
Endogenous	CCL24	NM_002991.2	0.407166	0.530585	0.430501	0.437819	0.458283	0.49211	1.50104	1.56478	1.38377	1.43137	1.43867	1.50814	0.3349	0.329615	0.353654	0.848926	0.901202	0.767808	4.48227	4.35429	4.2643	0.739806	0.700145	0.69585	0.351968	0.344741	0.337897	0.842848	0.84206	4.67969	4.41739	4.45098	0.749005	0.712203	0.732146
Endogenous	CCL3	NM_002983.2	0.120841	0.0981744	0.124525	0.108485	0.110441	0.096782	0.343735	0.326287	0.328367	0.339213	0.325853	0.338107	0.251912	0.217851	0.23986	1.46878	1.54181	1.47566	1.1157	1.12289	1.11607	0.834372	0.776939	0.818059	0.235062	0.231093	0.231035	1.48043	1.47294	1.10202	1.10893	1.09689	0.821228	0.789529	0.834736
Endogenous	CCL4	NM_002984.2	0.641382	0.625613	0.599368	0.644226	0.644067	0.610961	0.374771	0.389103	0.380187	0.394213	0.384288	0.375148	1.29153	1.24965	1.27714	4.44253	4.64897	4.51127	2.36269	2.38382	2.3572	1.70621	1.7861	1.74112	1.27738	1.26019	1.27395	4.52921	4.49222	2.36487	2.33442	2.40098	1.72394	1.76246	1.71191
Endogenous	CCL5	NM_002985.2	0.70773	0.718331	0.649272	0.727313	0.72532	0.698911	2.58089	2.6191	2.63019	2.60999	2.53764	2.6377	1.41145	1.54007	1.43159	12.9443	13.5641	13.1471	13.5719	13.4467	13.453	14.3467	14.8971	14.8625	1.45296	1.46492	1.48406	13.2275	13.1098	13.3675	13.6195	12.7427	14.0627	14.8528	14.3323
Endogenous	CCL7	NM_006273.2	20	20	20	20	20	20	20	20	20	20	20	20	20	20	20	20	20	20	20	20	20	20	20	20	20	20	20	20	20	20	20	20	20	20	20
Endogenous	CCL8	NM_005623.2	0.679351	0.701643	0.626621	0.683241	0.711564	0.630205	20	20	20	20	20	20	20	20	20	1.00078	1.17088	0.963768	0.366522	0.371037	0.339279	0.121413	0.108323	0.110126	20	20	20	1.03896	1.01884	0.362564	0.337896	0.335168	0.127786	0.109456	0.121818
Endogenous	CCR1	NM_001295.2	1.31432	1.22872	1.13149	1.32045	1.31935	1.16718	2.56622	2.60249	2.66422	2.67354	2.5294	2.62909	2.08607	2.08944	2.05449	1.0453	1.15624	1.08369	0.881246	0.891361	0.953269	0.59143	0.567037	0.62777	2.06219	2.06914	2.08417	1.09135	1.07158	0.854818	0.93457	0.914129	0.5435	0.579648	0.59186
Endogenous	CCR2	NM_001123041.2	2.16757	2.32495	2.16309	2.16044	2.27773	2.0982	0.661763	0.677404	0.686147	0.682951	0.656977	0.678975	1.31411	1.31246	1.33056	1.65592	1.89556	1.54311	12.152	12.8369	11.967	1.79853	1.67996	1.74864	1.33618	1.31135	1.32732	1.68866	1.66676	11.506	11.3168	11.6134	2.05813	1.58043	1.91311
Endogenous	CCR3	NM_001837.2	20	20	20	20	20	20	20	20	20	20	20	20	20	20	20	20	20	20	20	20	20	20	20	20	20	20	20	20	20	20	20	20	20	20	20
Endogenous	CCR4	NM_005508.4	20	20	20	20	20	20	20	20	20	20	20	20	20	20	20	20	20	20	20	20	20	20	20	20	20	20	20	20	20	20	20	20	20	20	20
Endogenous	CCR7	NM_001838.2	1.59069	1.55127	1.43234	1.61369	1.60879	1.5021	20	20	20	20	20	20	1.9923	2.09833	1.92908	10.6928	11.3756	10.962	2.72004	2.59332	2.50151	2.69227	2.95792	2.74143	1.93526	2.04578	2.00214	10.9991	10.8708	2.79699	2.65886	2.42291	2.78726	2.88359	2.69688
Endogenous	CD163	NM_004244.4	0.52014	0.520318	0.518387	0.512569	0.525112	0.496631	0.670581	0.644422	0.709233	0.649378	0.72296	0.658826	1.58548	1.40562	1.54254	0.294977	0.315252	0.287051	0.393162	0.411281	0.456337	0.664468	0.679179	0.648561	1.50791	1.54095	1.46581	0.298219	0.29619	0.348517	0.429897	0.379177	0.735514	0.649421	0.683354
Endogenous	CD4	NM_000616.3	0.845748	0.887995	0.891225	0.834305	0.864747	0.844971	2.63973	2.63076	2.57357	2.61021	2.60967	2.6219	1.62804	1.75545	1.64674	0.343096	0.363169	0.324055	0.246807	0.245737	0.236373	0.54934	0.513938	0.514279	1.66273	1.67814	1.69412	0.342624	0.341726	0.243204	0.238923	0.225288	0.589895	0.507546	0.558116
Endogenous	CD40	NM_001250.4	0.308789	0.289369	0.323983	0.294581	0.298455	0.288168	0.596292	0.580799	0.56655	0.581765	0.588422	0.581004	1.92097	1.7999	1.9089	1.29335	1.30659	1.27581	1.86828	1.85515	1.88487	1.81526	1.90665	1.86058	1.88937	1.85482	1.85739	1.287	1.28813	1.79265	1.90278	1.68832	1.85452	1.86716	1.83251
Endogenous	CD40LG	NM_000074.2	20	20	20	20	20	20	20	20	20	20	20	20	20	20	20	20	20	20	20	20	20	20	20	20	20	20	20	20	20	20	20	20	20	20	20
Endogenous	CD55	NM_000574.3	20	20	20	20	20	20	20	20	20	20	20	20	20	20	20	20	20	20	20	20	20	20	20	20	20	20	20	20	20	20	20	20	20	20	20
Endogenous	CD86	NM_175862.3	0.436477	0.451883	0.407437	0.462331	0.443125	0.47632	0.834054	0.839506	0.928639	0.836872	0.857668	0.871372	0.204752	0.211214	0.204809	0.479725	0.446422	0.506998	1.06075	1.10292	1.16404	0.334045	0.292237	0.306434	0.206109	0.210315	0.207843	0.479554	0.481475	1.05958	1.10281	1.26159	0.317136	0.310623	0.323544
Endogenous	CDC42	NM_001039802.1	10.5027	10.5071	10.768	10.2853	10.5372	10.1341	10.6291	10.5584	10.6089	10.6092	10.7165	10.5517	7.83016	8.04358	7.88503	6.94272	7.28625	6.72366	7.26212	7.42679	7.46889	8.03075	8.05285	8.36019	7.92773	7.85579	7.97802	6.96535	6.94055	7.18629	7.26601	7.6189	7.96011	7.96605	8.14646
Endogenous	CEBPB	NM_005194.2	2.86478	2.86166	3.17511	2.74421	2.82964	2.80697	0.880678	0.851098	0.857045	0.835565	0.877146	0.866675	2.9851	2.90361	3.03928	5.55044	5.63678	5.26699	5.12224	5.11387	5.08526	5.69415	5.56846	5.81461	3.01147	2.97619	2.9492	5.46696	5.48707	5.02044	5.10525	4.82982	5.56457	5.59174	5.72225
Endogenous	CFB	NM_001710.5	0.330564	0.407645	0.321699	0.353744	0.369914	0.368101	4.63141	4.6164	4.2543	4.26357	4.38483	4.61826	7.65791	7.38479	7.96252	0.673117	0.755866	0.623071	0.487113	0.483288	0.446984	0.485586	0.499649	0.49094	7.94472	7.64233	7.66956	0.684799	0.677147	0.502862	0.454486	0.470296	0.486292	0.497155	0.485155
Endogenous	CFD	NM_001928.2	1.24781	1.24573	1.1961	1.29458	1.2392	1.33118	2.23957	2.27528	2.26708	2.29178	2.20895	2.27346	2.15366	2.16811	2.1297	1.60989	1.47292	1.70533	2.14711	2.03476	1.98269	1.26762	1.23856	1.24856	2.13287	2.16726	2.14997	1.59933	1.61015	2.32492	2.11371	2.1479	1.22789	1.26716	1.24797
Endogenous	CFL1	NM_005507.2	11.1291	11.3011	11.1123	11.1372	11.2456	11.0848	18.857	18.8551	18.7406	18.877	18.7121	18.8627	11.1064	11.2769	11.1396	7.54611	7.73908	7.44791	7.72311	7.84709	7.90004	11.5425	11.6742	11.6529	11.1755	11.1408	11.2198	7.57478	7.55604	7.63378	7.74666	7.93585	11.6739	11.5614	11.6208
Endogenous	CREB1	NM_134442.2	1.16409	1.13739	1.18411	1.14752	1.14847	1.14386	1.82911	1.8326	1.85251	1.87232	1.82099	1.83833	1.52736	1.53682	1.52923	0.723448	0.718754	0.72312	0.688139	0.682961	0.677063	0.436551	0.41047	0.41033	1.52912	1.52582	1.53185	0.72105	0.722005	0.72602	0.681744	0.756792	0.439836	0.418733	0.431627
Endogenous	CRP	NM_000567.2	20	20	20	20	20	20	20	20	20	20	20	20	20	20	20	20	20	20	20	20	20	20	20	20	20	20	20	20	20	20	20	20	20	20	20
Endogenous	CSF1	NM_000757.4	20	20	20	20	20	20	20	20	20	20	20	20	17.297	16.4107	17.0272	20	20	20	18.5611	18.4821	19.2452	2.92088	2.43593	2.78879	16.8715	16.9953	16.7119	20	20	18.2655	19.2762	18.4585	2.48244	2.70446	2.77696
Endogenous	CSF2	NM_000758.2	20	20	20	20	20	20	20	20	20	20	20	20	20	20	20	20	20	20	20	20	20	18.9303	18.5731	18.7695	20	20	20	20	20	20	20	20	18.7141	18.7489	18.8438
Endogenous	CSF3	NM_000759.2	10.7235	10.8238	10.8247	10.7594	10.736	10.9019	20	20	20	20	20	20	20	20	20	10.3491	10.2182	10.3444	8.13021	8.13707	8.04901	8.60914	9.64635	8.86986	20	20	20	10.3095	10.3284	8.24712	8.04346	8.32969	8.8456	9.39933	8.60313
Endogenous	CXCL1	NM_001511.1	0.814403	0.754627	0.876419	0.763015	0.782211	0.742351	2.32175	2.25053	2.22019	2.26591	2.32873	2.24736	5.59708	5.30389	5.43871	7.1031	7.29239	6.89441	5.65939	5.7996	5.62746	10.8668	11.303	11.2691	5.37303	5.43969	5.36497	7.05749	7.06071	5.46827	5.49156	5.42352	11.4228	10.8526	11.1942
Endogenous	CXCL10	NM_001565.1	1.33737	1.41708	1.29616	1.36624	1.38889	1.35515	11.9761	12.2591	11.4166	12.5367	11.4929	11.9301	4.58138	4.59769	4.51164	17.0174	18.0381	16.6468	3.03885	3.03727	2.98307	0.957732	1.02666	0.996766	4.49522	4.64492	4.52922	17.2386	17.1193	3.07655	2.98882	3.06207	0.918006	1.03406	0.942478
Endogenous	CXCL2	NM_002089.3	0.968683	0.909391	0.790531	1.00899	0.973567	0.904028	1.97889	2.02621	2.15153	2.05521	1.94273	2.0895	1.56788	1.5012	1.56169	4.78566	4.99093	5.20797	6.89779	6.78722	6.63465	5.6338	5.44246	5.58655	1.57011	1.51982	1.5557	4.99576	4.92108	7.04774	6.77618	6.74553	5.48719	5.53747	5.5921
Endogenous	CXCL3	NM_002090.2	1.37179	1.36785	1.28516	1.37651	1.39759	1.2978	0.812353	0.83703	0.822823	0.841847	0.809428	0.823633	1.36681	1.39987	1.3733	7.61331	8.26998	7.56775	5.49362	5.54495	5.61285	4.43961	4.15871	4.43394	1.38295	1.37141	1.3921	7.79926	7.70912	5.30912	5.5533	5.27881	4.34179	4.21038	4.46136
Endogenous	CXCL5	NM_002994.3	2.90208	3.07002	2.93227	2.95419	2.97355	3.03765	20	20	20	20	20	20	20	20	20	3.4645	3.48262	3.40459	0.815154	0.819026	0.887549	0.38847	0.38209	0.381746	20	20	20	3.45607	3.45771	0.798355	0.875444	0.860745	0.387448	0.385217	0.386353
Endogenous	CXCL6	NM_002993.3	1.46426	1.31852	1.38969	1.43425	1.40561	1.34854	1.41944	1.40116	1.51522	1.45002	1.5641	1.38764	0.652721	0.594683	0.613158	2.64363	2.61798	2.77158	0.694737	0.697031	0.744383	0.617533	0.637292	0.642122	0.604496	0.624565	0.607201	2.67068	2.66386	0.697205	0.735634	0.761421	0.55734	0.663047	0.596909
Endogenous	CXCL9	NM_002416.1	20	20	20	20	20	20	20	20	20	20	20	20	20	20	20	20	20	20	20	20	20	20	20	20	20	20	20	20	20	20	20	20	20	20	20
Endogenous	CXCR1	NM_000634.2	20	20	20	20	20	20	20	20	20	20	20	20	20	20	20	20	20	20	20	20	20	20	20	20	20	20	20	20	20	20	20	20	20	20	20
Endogenous	CXCR2	NM_001557.2	0.696251	0.782697	0.864201	0.6931	0.700879	0.826677	0.301985	0.274183	0.275767	0.255223	0.316578	0.279596	0.281157	0.296747	0.289738	2.5383	2.24913	2.3753	20	20	20	20	20	20	0.287577	0.299356	0.285857	2.39313	2.45144	20	20	20	20	20	20
Endogenous	CXCR4	NM_003467.2	0.374231	0.366731	0.35342	0.380094	0.3733	0.371671	0.846699	0.860286	0.842469	0.861936	0.842317	0.849289	0.943432	1.00768	0.946116	0.700063	0.693685	0.723782	0.998549	1.01398	0.992325	1.59037	1.73876	1.57336	0.958624	0.961807	0.979753	0.706314	0.70479	1.03945	0.973746	1.12214	1.78755	1.64054	1.63118
Endogenous	CYSLTR1	NM_006639.2	0.70755	0.671006	0.6938	0.698442	0.692396	0.678484	0.840755	0.819284	0.844403	0.82575	0.828203	0.842717	0.215167	0.205291	0.209619	0.502862	0.500203	0.513545	0.518603	0.537097	0.625157	1.00705	0.998822	0.982812	0.207093	0.214036	0.206337	0.50484	0.504381	0.497349	0.590018	0.61738	1.01333	1.00493	1.00026
Endogenous	CYSLTR2	NM_020377.2	20	20	20	20	20	20	21.2116	21.3002	21.1515	21.2622	21.2079	21.209	20	20	20	20	20	20	20	20	20	20	20	20	20	20	20	20	20	20	20	20	20	20	20
Endogenous	DAXX	NM_001350.3	0.843673	0.891326	0.908186	0.851622	0.849005	0.919353	1.1675	1.14268	1.21634	1.14407	1.16053	1.18993	2.01049	1.91939	2.0109	0.888725	0.836109	0.873815	1.00786	1.02554	0.960582	1.39771	1.57958	1.42469	1.99541	1.98946	1.96207	0.868029	0.877031	1.05602	0.94457	1.10203	1.49489	1.5128	1.41155
Endogenous	DDIT3	NM_004083.4	3.51619	3.44288	3.52679	3.38658	3.53603	3.18125	1.99466	2.00423	1.96051	2.0282	1.95875	1.99204	2.45382	2.48408	2.46484	1.62106	1.8187	1.5466	1.57826	1.61568	1.6037	1.90614	1.84588	1.90144	2.46907	2.44645	2.47581	1.65047	1.63152	1.53596	1.56218	1.57317	1.98539	1.8079	1.95277
Endogenous	DEFA1	NM_004084.2	10.7218	10.911	10.7673	10.8167	10.7798	10.9909	20	20	20	20	20	20	20	20	20	10.4709	10.3301	10.4778	5.84691	5.80854	6.13762	2.44953	2.1823	2.45412	20	20	20	10.4365	10.4544	5.68716	6.15923	5.70978	2.20642	2.30564	2.40595
Endogenous	ELK1	NM_005229.3	0.364708	0.338245	0.31711	0.382002	0.354623	0.370285	5.52395	5.54948	6.02397	5.70979	5.3893	5.81921	0.56695	0.592089	0.562805	0.569121	0.514731	0.641675	0.750976	0.749726	0.729502	1.10017	1.16767	1.10161	0.573394	0.56426	0.586699	0.574978	0.576315	0.782229	0.731408	0.798446	1.13837	1.14606	1.10201
Endogenous	FASLG	NM_000639.1	20	20	20	20	20	20	20	20	20	20	20	20	20	20	20	20	20	20	20	20	20	20	20	20	20	20	20	20	20	20	20	20	20	20	20
Endogenous	FLT1	NM_002019.4	13.5742	14.4143	13.7075	13.8242	13.9431	14.2029	17.4514	17.4877	17.1899	17.1607	16.993	17.6116	18.3875	18.899	18.8183	15.6506	15.8177	15.337	20	20	20	20	20	20	18.9126	18.6618	18.8348	15.6256	15.6246	20	20	20	20	20	20
Endogenous	FOS	NM_005252.2	1.88738	1.94514	1.86923	1.85355	1.95182	1.75719	0.527839	0.526433	0.53953	0.531533	0.535366	0.5289	0.665381	0.628614	0.664365	0.639959	0.736679	0.601442	0.642485	0.664422	0.646163	0.576411	0.683272	0.675007	0.661591	0.643288	0.65097	0.654719	0.645401	0.615052	0.623751	0.620346	0.578293	0.641723	0.597342
Endogenous	FXYD2	NM_021603.3	4.31326	4.47623	4.65017	4.22384	4.35917	4.33232	0.301837	0.30679	0.299743	0.305715	0.321023	0.293177	6.31584	7.00376	6.82543	6.0598	6.25588	5.73942	20	20	20	3.70046	3.8857	4.18781	6.94489	6.58721	6.88705	6.00627	6.01193	20	20	20	3.17535	4.01929	3.62542
Endogenous	GNAQ	NM_002072.2	0.473175	0.464969	0.444883	0.477116	0.475499	0.45767	1.15682	1.13639	1.16513	1.13633	1.14022	1.16467	1.08456	1.04236	1.07517	0.226139	0.233585	0.229985	0.279612	0.273303	0.236527	0.556487	0.505964	0.520019	1.06585	1.07817	1.05509	0.229799	0.228305	0.282747	0.247151	0.228289	0.561301	0.517001	0.553293
Endogenous	GNAS	NM_080425.1	4.39027	4.25205	4.54784	4.24742	4.32365	4.1719	2.47816	2.43101	2.47542	2.4504	2.54452	2.4314	2.94741	2.84566	2.9333	1.54866	1.59224	1.51538	0.986042	0.998916	1.05859	1.24599	1.25608	1.2898	2.91252	2.9041	2.88592	1.54733	1.54539	0.94842	1.03748	0.996951	1.23029	1.24782	1.25693
Endogenous	GNB1	NM_002074.3	3.50067	3.4427	3.49295	3.49245	3.46881	3.48622	3.05269	3.07555	3.01258	3.08212	3.08642	3.01966	4.04357	3.95773	4.02364	2.57714	2.53874	2.60461	2.6979	2.63491	2.6374	3.65651	3.54623	3.71916	4.0096	4.00205	3.9927	2.57322	2.57644	2.70893	2.7141	2.54234	3.45093	3.63339	3.61925
Endogenous	GNGT1	NM_021955.3	20	20	20	20	20	20	20	20	20	20	20	20	20	20	20	20	20	20	20	20	20	20	20	20	20	20	20	20	20	20	20	20	20	20	20
Endogenous	GRB2	NM_203506.2	1.82694	1.61089	1.91218	1.75505	1.68999	1.76726	0.164175	0.157337	0.185215	0.161983	0.178366	0.165346	1.75289	1.3654	1.64831	0.430536	0.382772	0.454425	0.952017	0.955886	0.912217	0.0962576	0.103429	0.108176	1.5717	1.63295	1.48815	0.420823	0.426346	0.975202	0.911182	0.968245	0.0907687	0.102011	0.0974363
Endogenous	HDAC4	NM_006037.3	0.518375	0.585422	0.550495	0.525524	0.546769	0.55313	1.04317	0.966864	1.04369	0.901826	1.01641	1.05303	0.389152	0.410272	0.419007	0.102356	0.108125	0.0951141	0.430271	0.440075	0.49136	0.270666	0.26131	0.265735	0.41883	0.412522	0.406687	0.101852	0.101708	0.395818	0.474427	0.426814	0.284123	0.256446	0.276366
Endogenous	HIF1A	NM_001530.2	5.41061	4.96983	5.23711	5.32433	5.21463	5.12246	3.57074	3.56319	3.62906	3.63148	3.54012	3.60092	2.77146	2.73366	2.73902	3.16242	3.08099	3.29737	2.72356	2.63601	2.54318	2.8513	2.76877	2.79287	2.7351	2.73473	2.74362	3.17428	3.17506	2.81766	2.6526	2.57411	2.7958	2.82042	2.81885
Endogenous	HLA-DRA	NM_019111.3	0.241173	0.242209	0.231559	0.246262	0.242459	0.245606	0.77101	0.82857	0.748935	0.83312	0.842879	0.738373	0.888879	0.979908	0.864598	0.673794	0.663341	0.690242	0.626041	0.592956	0.498625	0.855606	0.901478	0.879805	0.875695	0.924557	0.91854	0.676769	0.676454	0.684358	0.540689	0.542421	0.863979	0.887206	0.860014
Endogenous	HLA-DRB1	NM_002124.1	1.21233	1.23454	1.20689	1.23575	1.21613	1.26913	4.53617	4.56008	4.51436	4.54121	4.49026	4.55606	3.25338	3.30298	3.24688	0.992692	0.952373	1.0092	0.796829	0.793596	0.815269	0.884145	0.877831	0.886118	3.25803	3.26865	3.27923	0.986583	0.990612	0.807706	0.816121	0.837875	0.846868	0.897458	0.869986
Endogenous	HMGB1	NM_002128.4	2.45798	2.31711	2.46176	2.47414	2.35273	2.55365	1.07228	1.08848	1.04889	1.07783	1.08903	1.05772	1.46314	1.42863	1.44772	0.884487	0.777359	0.944933	0.66733	0.624734	0.64306	0.541939	0.452764	0.48151	1.43733	1.45886	1.43243	0.867982	0.878911	0.704007	0.692696	0.643424	0.493365	0.498253	0.513184
Endogenous	HMGB2	NM_001130688.1	1.08625	1.10227	1.04743	1.1189	1.09274	1.13617	1.38227	1.41681	1.43754	1.44431	1.36513	1.42143	0.700642	0.677935	0.687878	0.331725	0.318416	0.342231	0.476568	0.461283	0.482437	0.306543	0.286745	0.279918	0.68477	0.694329	0.683833	0.331544	0.332332	0.474676	0.499704	0.450563	0.290343	0.30572	0.291382
Endogenous	HMGN1	NM_004965.6	2.06377	2.03191	2.0927	2.00703	2.0642	1.93883	5.42245	5.38739	5.37451	5.47942	5.33991	5.41272	1.83145	1.88112	1.81506	1.2155	1.30011	1.17683	1.00209	1.01251	0.915894	1.40659	1.59519	1.48405	1.82444	1.82878	1.85347	1.2259	1.21837	1.03731	0.912803	1.00272	1.53191	1.493	1.45395
Endogenous	HRAS	NM_005343.2	1.16603	1.17651	0.960391	1.2424	1.21081	1.14859	1.22429	1.27665	1.41076	1.308	1.21115	1.32979	0.397916	0.399711	0.411542	0.555876	0.587635	0.590869	2.65286	2.65789	2.59378	0.238245	0.272125	0.238679	0.418194	0.395764	0.412125	0.579492	0.570665	2.73924	2.58976	2.80117	0.270014	0.254384	0.244191
Endogenous	HSH2D	NM_032855.2	20	20	20	20	20	20	20	20	20	20	20	20	20	20	20	20	20	20	20	20	20	20	20	20	20	20	20	20	20	20	20	20	20	20	20
Endogenous	HSPB1	NM_001540.3	0.713238	0.812344	0.72764	0.757775	0.747467	0.835438	2.00001	1.99683	1.96158	1.91669	1.95362	2.01768	1.27172	1.30661	1.28562	0.296157	0.278338	0.294207	0.135594	0.121892	0.122754	0.488133	0.574628	0.50003	1.27992	1.33174	1.27632	0.291305	0.293739	0.145773	0.139172	0.11829	0.526306	0.546929	0.491167
Endogenous	HSPB2	NM_001541.3	20	20	20	20	20	20	20	20	20	20	20	20	20	20	20	20	20	20	20	20	20	20	20	20	20	20	20	20	20	20	20	20	20	20	20
Endogenous	IFI44	NM_006417.4	0.0518504	0.0597024	0.0414035	0.059075	0.0572956	0.0578459	0.279891	0.286849	0.265462	0.271087	0.257048	0.288423	0.315973	0.291806	0.323652	1.00319	1.05436	1.05735	1.28421	1.26792	1.26603	1.01373	1.02433	1.03056	0.325331	0.303612	0.313481	1.04676	1.03094	1.2794	1.28657	1.22346	0.962625	1.04631	0.99628
Endogenous	IFIT1	NM_001548.3	7.85868	8.9269	8.28497	8.12809	8.25056	8.80802	3.39258	3.38743	3.59077	3.51788	3.43896	3.44426	2.42806	2.73768	2.54514	56.884	56.5043	54.3994	8.35853	8.53285	8.90306	6.9091	6.85056	7.05539	2.58358	2.57738	2.61501	56.125	56.3737	8.03591	8.65936	8.48734	6.53995	6.99722	6.82498
Endogenous	IFIT2	NM_001547.4	0.662922	0.490711	0.544003	0.612327	0.605993	0.470466	2.50364	2.31471	2.77143	2.54515	2.5302	2.53368	8.08735	6.38813	7.88095	3.67284	4.17904	4.01534	2.43357	2.41527	2.37501	0.87809	0.846739	0.906399	7.72441	7.05012	7.29641	3.90722	3.80886	2.41378	2.40301	2.29054	0.82937	0.862256	0.87663
Endogenous	IFIT3	NM_001031683.2	1.86374	1.95819	1.75631	1.8637	1.96643	1.72889	20	20	20	20	20	20	20	20	20	9.34435	11.1447	8.81097	1.59425	1.63663	1.54154	0.987544	0.956473	1.01012	20	20	20	9.68998	9.49576	1.57641	1.50399	1.56938	1.01873	0.932539	1.01929
Endogenous	IFNA1	NM_024013.1	20	20	20	20	20	20	20	20	20	20	20	20	20	20	20	20	20	20	20	20	20	20	20	20	20	20	20	20	20	20	20	20	20	20	20
Endogenous	IFNB1	NM_002176.2	20	20	20	20	20	20	20	20	20	20	20	20	20	20	20	20	20	20	20	20	20	20	20	20	20	20	20	20	20	20	20	20	20	20	20
Endogenous	IFNG	NM_000619.2	20	20	20	20	20	20	20	20	20	20	20	20	20	20	20	20	20	20	20	20	20	20	20	20	20	20	20	20	20	20	20	20	20	20	20
Endogenous	IL10	NM_000572.2	0.188275	0.159763	0.185812	0.178345	0.174558	0.166573	0.223128	0.212058	0.221907	0.217034	0.218511	0.221289	1.68145	1.53818	1.74759	0.2405	0.232795	0.25303	0.667463	0.645675	0.650392	0.58934	0.600084	0.604045	1.74982	1.5518	1.67544	0.240861	0.241154	0.661136	0.677309	0.596143	0.559074	0.611349	0.580125
Endogenous	IL10RB	NM_000628.3	4.54092	4.46686	4.57637	4.52616	4.48716	4.55596	5.42854	5.38807	5.49631	5.39669	5.47151	5.43195	5.01216	4.8066	4.97532	5.10484	4.97168	5.16139	5.84558	5.85634	5.84233	11.7301	11.8982	11.8265	4.93431	4.95688	4.88068	5.07929	5.09406	5.75997	5.8362	5.66011	11.7742	11.837	11.7554
Endogenous	IL11	NM_000641.2	8.64924	8.75817	8.75913	8.68811	8.6628	8.84323	20	20	20	20	20	20	20	20	20	8.24553	8.10556	8.24053	5.96036	5.96713	5.88045	10.3479	11.3315	10.4486	20	20	20	8.20311	8.22332	6.07591	5.87499	6.15787	10.9803	10.9379	10.4449
Endogenous	IL12A	NM_000882.2	20	20	20	20	20	20	20	20	20	20	20	20	20	20	20	20	20	20	20	20	20	20	20	20	20	20	20	20	20	20	20	20	20	20	20
Endogenous	IL12B	NM_002187.2	20	20	20	20	20	20	20	20	20	20	20	20	20	20	20	20	20	20	20	20	20	10.2351	11.0358	10.6234	20	20	20	20	20	20	20	20	9.86844	11.0921	10.0716
Endogenous	IL13	NM_002188.2	20	20	20	20	20	20	20	20	20	20	20	20	20	20	20	20	20	20	20	20	20	20	20	20	20	20	20	20	20	20	20	20	20	20	20
Endogenous	IL15	NM_000585.3	7.81378	7.92419	7.92517	7.85316	7.82751	8.01053	20	20	20	20	20	20	20	20	20	7.40603	7.26522	7.401	5.14707	5.15362	5.06975	5.45784	6.4993	5.71777	20	20	20	7.36333	7.38367	5.25907	5.06448	5.33867	5.67688	6.2513	5.44847
Endogenous	IL17A	NM_002190.2	20	20	20	20	20	20	20	20	20	20	20	20	20	20	20	20	20	20	20	20	20	20	20	20	20	20	20	20	20	20	20	20	20	20	20
Endogenous	IL18	NM_001562.2	1.74036	1.57833	1.74138	1.62337	1.6936	1.46372	0.812792	0.822647	0.836825	0.861868	0.836393	0.808694	1.04964	0.908866	1.00796	0.462147	0.52205	0.44648	0.690847	0.651986	0.590537	0.301815	0.302739	0.330646	0.98479	0.983561	0.960634	0.472179	0.466082	0.765188	0.637201	0.663849	0.291194	0.297881	0.309858
Endogenous	IL18RAP	NM_003853.2	20	20	20	20	20	20	20	20	20	20	20	20	20	20	20	20	20	20	20	20	20	20	20	20	20	20	20	20	20	20	20	20	20	20	20
Endogenous	IL1A	NM_000575.3	20	20	20	20	20	20	20	20	20	20	20	20	20	20	20	20	20	20	19.6043	19.582	19.7952	7.37766	7.40501	7.76028	20	20	20	20	20	19.5203	19.8037	19.5753	6.69343	7.64857	7.23294
Endogenous	IL1B	NM_000576.2	1.32118	1.32406	1.28871	1.33413	1.3273	1.32447	1.14234	1.18294	1.12019	1.1859	1.14324	1.13861	3.19349	3.44203	3.2513	15.1941	15.2268	15.3434	7.78817	7.80226	8.41805	18.3049	17.3311	17.8684	3.30917	3.22953	3.37072	15.2631	15.2408	7.60204	8.33917	8.04811	17.7416	17.7873	18.0823
Endogenous	IL1R1	NM_000877.2	6.91104	8.02795	6.78594	7.33524	7.44054	7.71837	10.0988	9.90292	10.2323	9.1752	10.5602	10.0523	3.92491	4.64122	4.3036	2.15724	2.23417	2.08283	2.03864	2.04859	2.06691	1.26193	1.31575	1.19387	4.45121	4.17656	4.48052	2.16728	2.1604	1.95093	2.05819	1.88191	1.43168	1.25678	1.28687
Endogenous	IL1RAP	NM_002182.2	2.63682	2.95989	3.07874	2.63396	2.70302	2.97309	2.17862	2.13524	2.18579	2.10845	2.18332	2.17567	0.502703	0.460636	0.486201	2.33522	2.2386	2.17141	1.68043	1.72606	1.74398	7.59256	7.16923	7.43526	0.475776	0.498668	0.468505	2.25235	2.28199	1.62989	1.68875	1.71194	8.19918	6.93699	7.88055
Endogenous	IL1RN	NM_173842.1	0.562191	0.54843	0.567566	0.559724	0.552454	0.56457	0.799837	0.800554	0.774632	0.803748	0.761834	0.805044	0.799057	0.800281	0.806406	1.97323	1.89872	2.00709	1.73492	1.68161	1.7044	2.14403	2.10988	2.13217	0.808666	0.790396	0.806501	1.95952	1.96763	1.76965	1.7661	1.68269	2.00507	2.19134	2.08444
Endogenous	IL2	NM_000586.2	20	20	20	20	20	20	20	20	20	20	20	20	20	20	20	20	20	20	20	20	20	20	20	20	20	20	20	20	20	20	20	20	20	20	20
Endogenous	IL21	NM_021803.2	20	20	20	20	20	20	20	20	20	20	20	20	20	20	20	20	20	20	20	20	20	20	20	20	20	20	20	20	20	20	20	20	20	20	20
Endogenous	IL22	NM_020525.4	20	20	20	20	20	20	20	20	20	20	20	20	20	20	20	20	20	20	20	20	20	20	20	20	20	20	20	20	20	20	20	20	20	20	20
Endogenous	IL22RA2	NM_181309.1	20	20	20	20	20	20	20	20	20	20	20	20	20	20	20	20	20	20	20	20	20	20	20	20	20	20	20	20	20	20	20	20	20	20	20
Endogenous	IL23A	NM_016584.2	0.273423	0.263726	0.306633	0.27278	0.256882	0.308405	1.50515	1.41805	1.44557	1.35236	1.45396	1.49301	0.227784	0.20055	0.223973	0.84051	0.667748	0.887889	1.07597	1.01421	1.08439	3.88078	3.8192	3.55083	0.215359	0.228045	0.206368	0.795907	0.818971	1.08417	1.15661	0.990577	3.81638	3.98816	3.70936
Endogenous	IL23R	NM_144701.2	20	20	20	20	20	20	9.76975	9.84191	9.87654	9.98755	9.43948	9.97729	10.7835	8.62156	10.0859	20	20	20	20	20	20	15.3517	14.8326	15.2651	9.69941	10.0058	9.31519	20	20	20	20	20	15.4439	14.8174	15.475
Endogenous	IL3	NM_000588.3	20	20	20	20	20	20	20	20	20	20	20	20	20	20	20	20	20	20	20	20	20	20	20	20	20	20	20	20	20	20	20	20	20	20	20
Endogenous	IL4	NM_000589.2	20	20	20	20	20	20	20	20	20	20	20	20	20	20	20	20	20	20	20	20	20	20	20	20	20	20	20	20	20	20	20	20	20	20	20
Endogenous	IL5	NM_000879.2	20	20	20	20	20	20	20	20	20	20	20	20	20	20	20	20	20	20	20	20	20	20	20	20	20	20	20	20	20	20	20	20	20	20	20
Endogenous	IL6	NM_000600.1	20	20	20	20	20	20	20	20	20	20	20	20	20	20	20	20	20	20	20	20	20	20	20	20	20	20	20	20	20	20	20	20	20	20	20
Endogenous	IL6R	NM_000565.2	1.52696	1.49562	1.43562	1.51511	1.54484	1.41063	1.07107	1.09775	1.08454	1.11132	1.08678	1.07369	3.77426	3.51092	3.76738	0.449529	0.493573	0.44556	0.548641	0.553286	0.587412	0.467574	0.495273	0.478886	3.73719	3.65526	3.65412	0.461216	0.45541	0.54237	0.577797	0.585264	0.490557	0.478327	0.476435
Endogenous	IL7	NM_000880.2	20	20	20	20	20	20	20	20	20	20	20	20	20	20	20	20	20	20	20	20	20	20	20	20	20	20	20	20	20	20	20	20	20	20	20
Endogenous	IL8	NM_000584.2	5.0498	5.15071	5.38139	4.96662	5.0527	5.10253	17.2128	16.9332	16.0686	16.4677	16.7188	16.8788	23.4174	24.5747	23.7633	92.34	92.6008	89.3108	100.862	102.092	101.939	135.572	134.657	135.918	23.8724	23.8836	24.0566	91.3337	91.6187	98.9603	100.571	99.7697	136.3	134.14	136.267
Endogenous	IL9	NM_000590.1	20	20	20	20	20	20	20	20	20	20	20	20	20	20	20	20	20	20	20	20	20	20	20	20	20	20	20	20	20	20	20	20	20	20	20
Endogenous	IRF1	NM_002198.1	0.64946	0.712559	0.572063	0.697496	0.694048	0.683677	1.22835	1.28176	1.2786	1.26977	1.228	1.26812	0.943168	0.973481	0.94023	0.326051	0.346033	0.330522	0.156058	0.154419	0.152654	0.227925	0.242362	0.236075	0.940341	0.981176	0.947946	0.335488	0.331609	0.152116	0.155103	0.140511	0.224998	0.240752	0.227121
Endogenous	IRF3	NM_001571.5	1.21404	1.16914	1.25935	1.17881	1.1881	1.16954	1.09079	1.06717	1.05862	1.08042	1.08284	1.07026	0.917667	0.922267	0.908272	1.78708	1.7888	1.76981	3.00348	3.00882	2.94065	1.77235	1.89269	1.61506	0.911477	0.904893	0.920573	1.77795	1.78052	3.09517	2.93637	3.1608	1.96509	1.8569	1.74839
Endogenous	IRF5	NM_002200.3	0.296219	0.29257	0.321542	0.280844	0.294139	0.276688	0.31956	0.310538	0.29802	0.306605	0.329208	0.302732	0.501267	0.53659	0.500101	0.2472	0.265509	0.231608	0.217325	0.221759	0.242558	0.228932	0.255364	0.251967	0.501298	0.517111	0.512837	0.246568	0.245807	0.198034	0.235568	0.20456	0.231103	0.244844	0.234381
Endogenous	IRF7	NM_001572.3	0.0908776	0.0906743	0.090395	0.0887405	0.0921137	0.084389	0.190706	0.182284	0.183185	0.176806	0.173553	0.194703	0.62202	0.553191	0.645279	0.261767	0.290144	0.251098	0.34561	0.349093	0.356243	0.149296	0.159792	0.158364	0.633944	0.600467	0.596259	0.266259	0.263452	0.332632	0.351913	0.332577	0.147444	0.157237	0.150238
Endogenous	ITGB2	NM_000211.2	9.10658	8.73578	9.11091	9.01541	8.9041	8.95771	22.3101	22.1092	21.9961	22.2612	21.9855	22.2323	25.4716	25.623	25.5882	7.32363	7.11215	7.47337	6.90751	6.61254	6.57615	9.59238	9.49893	9.4978	25.6587	25.3039	25.682	7.29764	7.31671	7.22505	6.92316	6.70992	9.37258	9.65399	9.4732
Endogenous	JUN	NM_002228.3	0.258601	0.277553	0.267771	0.258305	0.268104	0.261483	0.527194	0.531542	0.501136	0.52277	0.489282	0.535132	0.213707	0.253384	0.224375	0.283332	0.303791	0.267114	0.19704	0.19798	0.224189	0.293824	0.27441	0.275565	0.230177	0.22809	0.237282	0.284197	0.282887	0.182033	0.220825	0.190264	0.302641	0.276894	0.293488
Endogenous	KEAP1	NM_012289.3	0.413613	0.338672	0.332991	0.414662	0.389187	0.354701	0.697469	0.763733	0.708593	0.796399	0.681587	0.71956	3.51618	4.27674	3.67684	0.28472	0.282027	0.32703	0.260125	0.249936	0.253511	0.552342	0.631036	0.495253	3.85508	3.64077	4.04754	0.296594	0.293133	0.270148	0.265202	0.256766	0.643314	0.606857	0.543921
Endogenous	KNG1	NM_000893.2	20	20	20	20	20	20	20	20	20	20	20	20	20	20	20	20	20	20	20	20	20	20	20	20	20	20	20	20	20	20	20	20	20	20	20
Endogenous	LIMK1	NM_002314.3	2.09416	1.96845	1.93945	2.07948	2.07081	1.9329	0.495625	0.512047	0.50069	0.522661	0.508833	0.493531	1.79385	1.72996	1.77154	0.560957	0.586416	0.576183	0.402781	0.398041	0.413219	0.52569	0.497983	0.541248	1.76877	1.74771	1.76316	0.573249	0.568191	0.396193	0.417912	0.389911	0.487722	0.512474	0.52226
Endogenous	LTA	NM_000595.2	20	20	20	20	20	20	20	20	20	20	20	20	20	20	20	20	20	20	20	20	20	20	20	20	20	20	20	20	20	20	20	20	20	20	20
Endogenous	LTB	NM_002341.1	6.19026	6.54278	5.79316	6.48681	6.40486	6.5238	2.99536	3.04244	2.77234	2.91695	3.10537	2.86132	9.79073	9.73003	9.62341	16.7379	16.7959	17.0373	20	20	20	20	20	20	9.65272	9.72605	9.73478	16.9132	16.8583	20	20	20	20	20	20
Endogenous	LTB4R	NM_181657.3	1.24678	1.08263	1.24133	1.20128	1.15943	1.16153	0.0627233	0.0650352	0.0680983	0.0696599	0.0675657	0.0628003	0.377707	0.403643	0.374172	1.41704	1.31108	1.50769	4.46769	4.47397	4.39364	3.53751	4.0294	3.90401	0.379842	0.379144	0.391872	1.40623	1.41523	4.57517	4.38859	4.6517	3.48127	3.91218	3.56864
Endogenous	LTB4R2	NM_019839.4	1.94052	1.74084	1.53888	2.0533	1.89396	1.86645	0.109356	0.115278	0.126484	0.118841	0.116607	0.114913	0.967794	0.877343	0.967752	2.28245	2.16041	2.64586	20	20	20	20	20	20	0.969486	0.920522	0.941173	2.36127	2.34436	20	20	20	20	20	20
Endogenous	LY96	NM_015364.2	2.91083	2.73715	2.90599	2.83001	2.83864	2.7264	2.81555	2.75727	2.79669	2.77223	2.77562	2.80946	2.70289	2.77669	2.74348	1.00903	1.02448	1.01484	1.23362	1.22216	1.15793	1.43517	1.40397	1.4586	2.75823	2.70568	2.76447	1.01335	1.0112	1.28473	1.17556	1.24392	1.35722	1.43738	1.41841
Endogenous	MAFF	NM_001161572.1	0.0180238	0.0211077	0.0160358	0.0201792	0.0195969	0.0212222	0.130512	0.13016	0.129806	0.120969	0.127934	0.133171	0.264735	0.288059	0.280096	0.0684017	0.0671758	0.07051	0.0598179	0.0628542	0.0737586	0.0746658	0.071793	0.0733362	0.286404	0.275669	0.285541	0.0692973	0.0691033	0.0552318	0.0684857	0.0685598	0.0756994	0.0717641	0.0751721
Endogenous	MAFG	NM_002359.2	0.754394	0.687341	0.685754	0.747755	0.735979	0.685969	1.38475	1.37988	1.42185	1.40182	1.35116	1.41511	0.82505	0.773775	0.812359	0.510559	0.525223	0.535611	0.706567	0.720663	0.671564	0.929724	0.929708	0.911879	0.807591	0.798204	0.798394	0.522532	0.518128	0.700165	0.661171	0.677623	0.954702	0.92355	0.932089
Endogenous	MAFK	NM_002360.3	0.429858	0.515412	0.421615	0.462517	0.469358	0.494328	0.671685	0.685988	0.679051	0.668116	0.683171	0.676437	0.544755	0.537863	0.537282	0.566518	0.585983	0.54429	0.841211	0.861893	0.874387	0.206569	0.190019	0.217529	0.532117	0.560802	0.530946	0.568674	0.567058	0.819448	0.848677	0.863336	0.191743	0.193798	0.208866
Endogenous	MAP2K1	NM_002755.2	2.30852	2.37879	2.3023	2.3552	2.33164	2.41881	1.91939	1.93052	1.91054	1.89194	2.00003	1.88675	0.539931	0.536389	0.525718	1.92852	1.87537	1.94329	1.4204	1.40256	1.40796	1.56205	1.61029	1.60628	0.521028	0.550365	0.52559	1.9195	1.9251	1.41838	1.42949	1.36937	1.56965	1.5889	1.57475
Endogenous	MAP2K4	NM_003010.2	0.66977	0.769192	0.697272	0.694666	0.710335	0.74476	0.15032	0.155363	0.149099	0.154938	0.138308	0.157048	0.544709	0.519046	0.549343	0.937875	0.956718	0.889845	2.12422	2.08828	2.21361	0.232304	0.223848	0.231392	0.543555	0.546013	0.530525	0.930938	0.932067	2.09351	2.24751	2.08193	0.215224	0.233506	0.2262
Endogenous	MAP2K6	NM_002758.3	1.22626	1.28873	1.32642	1.23253	1.23053	1.32828	0.792946	0.798427	0.768856	0.765247	0.758331	0.805149	0.630034	0.644097	0.659611	2.90059	2.73233	2.84701	20	20	20	20	20	20	0.663605	0.636154	0.651825	2.83165	2.86123	20	20	20	20	20	20
Endogenous	MAP3K1	NM_005921.1	1.10237	1.29566	1.23419	1.09628	1.18534	1.15973	1.04857	1.04711	1.04306	1.03317	1.02649	1.05891	1.54552	1.73024	1.6188	0.709726	0.799628	0.62178	1.05681	1.07197	0.913027	1.6199	1.75399	1.73114	1.64588	1.62455	1.66473	0.706203	0.702785	1.09188	0.911985	0.995715	1.77946	1.62601	1.70921
Endogenous	MAP3K5	NM_005923.3	0.772872	0.93588	0.731544	0.814548	0.86989	0.804656	0.336552	0.370803	0.324681	0.362409	0.306766	0.354472	2.79682	2.64111	2.88784	1.00973	1.22297	0.91908	3.18904	3.31836	3.16787	0.603326	0.641772	0.673643	2.88898	2.74187	2.78548	1.04489	1.02382	3.12595	3.0368	3.24924	0.588756	0.623071	0.619519
Endogenous	MAP3K7	NM_145333.1	0.962942	1.00548	0.996417	0.974346	0.973314	1.01861	3.23575	3.14231	3.14035	3.05679	3.02168	3.28958	1.15138	1.45266	1.24764	0.56041	0.544357	0.554361	0.579659	0.583533	0.642533	0.737142	0.712453	0.743996	1.29607	1.25002	1.34238	0.553995	0.556777	0.553667	0.632117	0.590479	0.684892	0.738288	0.72261
Endogenous	MAP3K9	NM_033141.2	20	20	20	20	20	20	20	20	20	20	20	20	20	20	20	20	20	20	20	20	20	20	20	20	20	20	20	20	20	20	20	20	20	20	20
Endogenous	MAPK1	NM_138957.2	1.66952	1.59128	1.8409	1.59495	1.60317	1.63724	1.52981	1.47513	1.49622	1.47518	1.56419	1.48441	0.929627	0.942111	0.933931	1.31513	1.2578	1.295	2.15348	2.23034	2.31357	3.99713	4.09873	4.06069	0.93365	0.929544	0.935932	1.286	1.29766	2.13051	2.20817	2.42706	4.04273	4.04927	4.02318
Endogenous	MAPK14	NM_001315.1	2.4219	2.38422	2.40142	2.42325	2.40283	2.41622	3.21716	3.2293	3.2261	3.23244	3.24131	3.21219	2.8138	2.82358	2.80741	1.27335	1.25374	1.29058	0.771242	0.799959	0.899341	1.52376	1.5497	1.54993	2.8071	2.81793	2.8137	1.27264	1.27391	0.744722	0.850225	0.901743	1.50064	1.55214	1.51971
Endogenous	MAPK3	NM_001040056.1	0.299611	0.308148	0.301594	0.304185	0.302076	0.312617	0.517758	0.53273	0.52201	0.539458	0.517517	0.522067	1.05282	1.07578	1.06682	0.240013	0.233968	0.240682	0.162978	0.17276	0.188935	0.558978	0.617148	0.573128	1.07529	1.05165	1.07716	0.238615	0.239362	0.155395	0.174602	0.191246	0.595917	0.590725	0.568352
Endogenous	MAPK8	NM_002750.2	0.255339	0.225399	0.2207	0.252911	0.248241	0.222204	0.250954	0.254895	0.263325	0.266025	0.225194	0.269782	0.0960123	0.0958546	0.0989541	0.45247	0.478778	0.48247	2.773	2.74	2.83242	1.41632	1.19499	1.3464	0.102013	0.0888301	0.101676	0.469537	0.462957	2.76301	2.86414	2.75354	1.30704	1.27184	1.38935
Endogenous	MAPKAPK2	NM_004759.3	1.37456	1.47165	1.27787	1.40253	1.4592	1.32632	1.3498	1.39327	1.4217	1.41993	1.36081	1.3855	0.83585	0.806649	0.815653	0.597004	0.690656	0.571819	0.233644	0.23543	0.221974	0.389801	0.413977	0.434152	0.811634	0.827704	0.812511	0.617277	0.606431	0.22892	0.221684	0.213181	0.39628	0.393611	0.407179
Endogenous	MAPKAPK5	NM_003668.2	0.820089	0.786499	0.806915	0.832375	0.795278	0.852943	0.852882	0.843035	0.844768	0.833561	0.843688	0.852817	0.616907	0.550495	0.600645	0.376979	0.338795	0.400761	0.442078	0.409878	0.409331	0.776491	0.705778	0.755156	0.586129	0.60194	0.570505	0.372192	0.375754	0.458464	0.448234	0.384476	0.659273	0.778468	0.729505
Endogenous	MASP1	NM_139125.3	20	20	20	20	20	20	20	20	20	20	20	20	20	20	20	20	20	20	20	20	20	20	20	20	20	20	20	20	20	20	20	20	20	20	20
Endogenous	MASP2	NM_139208.1	20	20	20	20	20	20	20	20	20	20	20	20	20	20	20	20	20	20	20	20	20	20	20	20	20	20	20	20	20	20	20	20	20	20	20
Endogenous	MAX	NM_002382.3	3.05252	3.03982	3.14919	3.03788	3.01952	3.11083	2.30555	2.3098	2.26967	2.27396	2.45037	2.22823	1.44616	1.42264	1.40011	1.15658	1.1159	1.15924	0.633955	0.619095	0.558155	0.59892	0.564107	0.562318	1.38228	1.47034	1.39359	1.14415	1.15004	0.680145	0.578962	0.621867	0.628986	0.563113	0.60246
Endogenous	MBL2	NM_000242.2	20	20	20	20	20	20	20	20	20	20	20	20	20	20	20	20	20	20	20	20	20	20	20	20	20	20	20	20	20	20	20	20	20	20	20
Endogenous	MEF2A	NM_005587.2	0.572766	0.537131	0.597808	0.579457	0.537112	0.63074	0.670349	0.680402	0.665381	0.687062	0.649654	0.678938	0.663187	0.684278	0.667961	0.525334	0.420236	0.57438	0.399518	0.389733	0.434553	0.683356	0.649126	0.613417	0.668778	0.673621	0.672611	0.50452	0.51677	0.398468	0.442507	0.416567	0.624403	0.710161	0.632053
Endogenous	MEF2BNB-MEF2B	NM_005919.2	20	20	20	20	20	20	20	20	20	20	20	20	20	20	20	20	20	20	20	20	20	20	20	20	20	20	20	20	20	20	20	20	20	20	20
Endogenous	MEF2C	NM_002397.3	3.17726	3.13882	3.15568	3.12344	3.18885	3.013	2.31996	2.30107	2.30296	2.3004	2.27652	2.32836	1.48528	1.45113	1.4911	0.710042	0.7545	0.695377	1.23462	1.24243	1.15696	0.755206	0.703362	0.738878	1.48584	1.46948	1.4714	0.717863	0.713191	1.26171	1.15588	1.22305	0.7414	0.716326	0.753905
Endogenous	MEF2D	NM_005920.2	1.78891	1.89074	2.04014	1.75522	1.79325	1.90287	3.57761	3.51366	3.57642	3.5254	3.53648	3.58058	1.2166	1.33551	1.22801	1.0317	0.99818	0.976604	0.367303	0.377152	0.381667	1.46716	2.00754	1.65544	1.24339	1.25958	1.27646	1.00213	1.01265	0.39685	0.367151	0.483823	1.66533	1.79099	1.52529
Endogenous	MKNK1	NM_003684.3	1.04157	1.00407	1.03354	1.04076	1.0194	1.04236	1.13715	1.15368	1.1455	1.1616	1.13324	1.14546	0.580469	0.634065	0.593011	0.610921	0.583102	0.629813	0.659737	0.632103	0.619773	0.550629	0.523937	0.520609	0.602222	0.595629	0.613939	0.607888	0.610304	0.717933	0.651225	0.694707	0.53927	0.541397	0.537692
Endogenous	MMP3	NM_002422.3	20	20	20	20	20	20	20	20	20	20	20	20	20	20	20	20	20	20	20	20	20	20	20	20	20	20	20	20	20	20	20	20	20	20	20
Endogenous	MMP9	NM_004994.2	2.63698	2.64221	2.66226	2.58221	2.6626	2.50326	21.1176	21.2397	20.1939	21.1611	20.7548	20.852	29.534	30.9584	29.5814	16.3843	17.6648	15.7876	11.8906	12.1127	12.0716	17.5617	17.6329	17.8314	29.7944	29.8371	30.2783	16.5498	16.4338	11.6263	11.8215	11.8643	17.7786	17.4149	17.766
Endogenous	MRC1	NM_002438.2	4.01818	4.55921	3.93863	4.22657	4.28224	4.3942	10.5979	10.5265	10.5028	10.0774	9.65847	11.1079	11.8427	12.2763	12.6907	6.21947	6.44323	6.03537	20	20	20	20	20	20	12.8607	12.0365	12.5331	6.25443	6.23259	20	20	20	20	20	20
Endogenous	MX1	NM_002462.2	17.5151	19.9501	19.9201	17.2022	18.4688	18.223	12.7108	12.3896	11.6014	12.1453	11.6359	12.6335	0.599337	0.551617	0.584817	104.957	115.237	92.8773	19.739	20.1283	19.8348	12.8634	13.1558	13.4274	0.570407	0.595344	0.559577	103.823	103.644	19.5258	19.4104	20.053	12.6131	13.0758	12.9439
Endogenous	MX2	NM_002463.1	0.480767	0.57828	0.587385	0.480864	0.507863	0.558213	0.761659	0.715508	0.699647	0.67295	0.725763	0.744799	0.308885	0.304098	0.314391	6.23911	6.22833	5.51448	6.48706	6.50769	6.31334	6.18859	6.25718	6.38753	0.308777	0.319973	0.301914	5.99816	6.06995	6.53446	6.30779	6.44068	6.06551	6.24769	6.20993
Endogenous	MYC	NM_002467.3	0.895156	0.803518	0.847473	0.889822	0.851237	0.859212	1.11526	1.12168	1.12254	1.14585	1.12239	1.11244	0.358097	0.417172	0.365271	0.539357	0.501818	0.581876	0.927923	0.895533	0.945213	1.29903	1.32449	1.30544	0.376149	0.372363	0.393018	0.539874	0.541788	0.934974	0.980825	0.903055	1.21495	1.37002	1.25873
Endogenous	MYD88	NM_002468.3	0.599394	0.598789	0.65232	0.593611	0.584918	0.635233	0.871686	0.848748	0.843373	0.837635	0.89445	0.843588	0.394848	0.434229	0.398876	1.84036	1.67581	1.8455	0.902085	0.893078	0.942868	1.13824	1.0824	1.07044	0.401163	0.415292	0.410733	1.78767	1.81228	0.915041	0.947784	0.962371	1.1121	1.12221	1.10772
Endogenous	MYL2	NM_000432.3	20	20	20	20	20	20	20	20	20	20	20	20	20	20	20	20	20	20	20	20	20	20	20	20	20	20	20	20	20	20	20	20	20	20	20
Endogenous	NFATC3	NM_004555.2	0.377297	0.363831	0.422477	0.358886	0.364091	0.369833	0.433888	0.424082	0.416696	0.425589	0.414089	0.432195	0.644297	0.706124	0.666005	0.237771	0.230518	0.230664	0.231936	0.242145	0.263671	1.1005	1.12014	1.05991	0.675749	0.658433	0.685607	0.232315	0.234308	0.225653	0.248073	0.271593	1.1794	1.09533	1.11001
Endogenous	NFE2L2	NM_006164.3	2.97449	3.06894	3.12361	2.95067	3.00012	3.02556	2.75592	2.7414	2.6679	2.69039	2.71422	2.73694	7.22085	7.16636	7.28109	3.99427	4.03304	3.86886	3.36729	3.33535	3.49744	2.90595	2.89047	2.96402	7.24235	7.27284	7.17739	3.96371	3.97077	3.34839	3.52066	3.40582	2.82348	2.91282	2.89986
Endogenous	NFKB1	NM_003998.2	0.28557	0.2846	0.30147	0.286881	0.278943	0.306105	0.600652	0.588805	0.570371	0.575276	0.594003	0.588073	1.21167	1.3041	1.24006	0.99758	0.894341	1.02136	1.48364	1.37793	1.24336	2.56102	2.92211	2.76844	1.25015	1.25392	1.26369	0.971774	0.985145	1.60813	1.37074	1.28597	2.42239	2.92101	2.51365
Endogenous	NLRP3	NM_001079821.2	0.444954	0.425793	0.435092	0.431584	0.44277	0.403177	1.71573	1.71262	1.77483	1.75674	1.67953	1.75474	0.335124	0.352431	0.336491	0.247419	0.269865	0.242719	0.196207	0.194347	0.174064	0.235873	0.292889	0.268566	0.341104	0.335233	0.347303	0.252047	0.249488	0.201851	0.178037	0.180375	0.249482	0.270363	0.244231
Endogenous	NOD1	NM_006092.1	0.527676	0.652494	0.507826	0.595061	0.57686	0.676253	0.0398774	0.0432079	0.0423845	0.0434391	0.0421364	0.0407356	0.111611	0.118371	0.110777	2.79707	2.58528	2.82861	13.6162	13.6211	13.5579	6.21177	5.20422	5.86989	0.110816	0.120115	0.112595	2.76562	2.78704	13.6995	13.5539	13.7579	5.76205	5.53655	6.10016
Endogenous	NOD2	NM_022162.1	0.19063	0.17544	0.225415	0.172626	0.179798	0.173532	1.38214	1.27875	1.27767	1.28356	1.26882	1.35906	0.312488	0.307744	0.314657	0.412887	0.416405	0.387694	1.27135	1.26454	1.26542	1.08746	1.23439	1.08815	0.315393	0.300421	0.314202	0.402631	0.405448	1.30726	1.27145	1.33781	1.20718	1.16729	1.10552
Endogenous	NOS2	NM_000625.4	20	20	20	20	20	20	20	20	20	20	20	20	20	20	20	20	20	20	20	20	20	20	20	20	20	20	20	20	20	20	20	20	20	20	20
Endogenous	NOX1	NM_007052.4	20	20	20	20	20	20	20	20	20	20	20	20	20	20	20	20	20	20	20	20	20	20	20	20	20	20	20	20	20	20	20	20	20	20	20
Endogenous	NR3C1	NM_001018074.1	2.36123	2.4722	2.43767	2.40292	2.38533	2.53177	3.3763	3.37146	3.32909	3.31153	3.35359	3.37331	1.92109	1.95634	1.91763	1.98232	1.89591	1.97513	1.16174	1.23082	1.34293	2.2072	2.33792	2.29321	1.91625	1.95415	1.92653	1.95553	1.96822	1.10718	1.24222	1.35611	2.15394	2.33387	2.19351
Endogenous	OAS2	NM_016817.2	1.72492	1.85881	1.66835	1.7802	1.80283	1.78778	1.00158	0.983838	1.02019	0.973312	1.01634	1.00211	0.527705	0.482699	0.525061	11.1402	11.6855	10.9222	7.67733	7.80058	7.68303	8.0285	8.44207	8.43863	0.518488	0.515119	0.503866	11.2655	11.1998	7.69364	7.54625	7.95359	8.01217	8.29013	8.11497
Endogenous	OASL	NM_198213.1	3.32584	3.94865	3.62729	3.48745	3.52806	3.96368	7.20481	7.28225	7.35341	7.13632	7.91736	6.99981	19.6872	18.2038	18.9308	15.6227	14.982	14.8169	1.33958	1.36889	1.36355	0.724381	0.702788	0.694817	18.2832	20.3844	17.9902	15.2235	15.3771	1.32507	1.32927	1.38596	0.747672	0.702242	0.725403
Endogenous	OXER1	NM_148962.3	11.6238	12.266	10.7193	12.2416	12.0414	12.2511	0.399167	0.442014	0.382277	0.436682	0.405303	0.397194	2.46828	1.70813	2.17557	14.2067	14.2498	14.5631	21.8904	21.7494	21.6069	4.62551	4.42153	4.71133	2.03235	2.23516	1.91155	14.3912	14.3342	21.9011	21.795	21.342	4.37888	4.52032	4.60304
Endogenous	PDGFA	NM_002607.5	2.67851	2.69434	2.29978	2.83003	2.749	2.68813	0.322337	0.342544	0.346086	0.351709	0.321052	0.337775	0.565338	0.45624	0.537823	1.24607	1.27166	1.32081	2.28954	2.25348	2.50082	1.63427	1.8782	1.70212	0.525665	0.516398	0.503801	1.28285	1.27042	2.23081	2.52392	2.30692	1.67761	1.82335	1.6311
Endogenous	PIK3C2G	NM_004570.4	20	20	20	20	20	20	20	20	20	20	20	20	20	20	20	20	20	20	20	20	20	20	20	20	20	20	20	20	20	20	20	20	20	20	20
Endogenous	PLA2G4A	NM_024420.2	1.59453	1.67813	1.86255	1.56075	1.58284	1.72801	0.728252	0.732775	0.72817	0.73306	0.729055	0.728756	0.0471579	0.0481696	0.0462383	0.773366	0.722747	0.735777	1.103	1.11157	1.09455	0.178466	0.192283	0.170778	0.0459495	0.0482024	0.0466528	0.74418	0.755504	1.13102	1.08439	1.17741	0.196154	0.185977	0.17907
Endogenous	PLCB1	NM_182734.1	20	20	20	20	20	20	12.9991	12.8948	12.8417	12.7599	13.4744	12.6988	20	20	20	20	20	20	20	20	20	20	20	20	20	20	20	20	20	20	20	20	20	20	20
Endogenous	PPP1R12B	NM_002481.3	4.95079	5.35082	5.50629	4.95648	5.02501	5.40823	0.689327	0.674042	0.707585	0.6633	0.726727	0.679786	0.508354	0.535949	0.502766	3.6714	3.52899	3.50967	6.63972	6.75578	6.51051	1.74428	1.76698	1.70876	0.499698	0.538568	0.508389	3.57574	3.61174	6.65646	6.39944	6.74746	1.76928	1.76763	1.73313
Endogenous	PRKCA	NM_002737.2	1.62113	1.36092	1.63478	1.52456	1.48713	1.44005	0.24825	0.245605	0.269175	0.262242	0.255997	0.251237	0.504579	0.484159	0.495253	1.39295	1.31916	1.46819	5.14707	5.15362	5.06975	1.1699	1.29913	1.26752	0.494325	0.486012	0.494287	1.38557	1.39169	5.25907	5.06448	5.33867	1.08904	1.30858	1.14871
Endogenous	PRKCB	NM_212535.1	0.68989	0.748999	0.759218	0.674824	0.714044	0.695851	0.445002	0.443218	0.427017	0.435517	0.453016	0.432982	1.07803	1.16464	1.10199	0.239895	0.260032	0.218588	0.261872	0.26524	0.239115	0.424978	0.428844	0.416678	1.10943	1.11751	1.12336	0.238466	0.237867	0.265395	0.238008	0.250045	0.46397	0.412362	0.436647
Endogenous	PTGDR2	NM_004778.1	20	20	20	20	20	20	20	20	20	20	20	20	20	20	20	20	20	20	20	20	20	20	20	20	20	20	20	20	20	20	20	20	20	20	20
Endogenous	PTGER1	NM_000955.2	20	20	20	20	20	20	20	20	20	20	20	20	20	20	20	20	20	20	20	20	20	20	20	20	20	20	20	20	20	20	20	20	20	20	20
Endogenous	PTGER2	NM_000956.2	1.71441	1.63601	1.61212	1.75881	1.67312	1.75929	6.49576	6.38013	6.26417	6.18737	7.16786	6.09108	1.66441	1.81931	1.65698	1.21876	1.11531	1.3131	0.348234	0.337134	0.358489	0.16793	0.147172	0.140778	1.68705	1.68827	1.74848	1.21623	1.22277	0.349886	0.370316	0.342606	0.180226	0.151724	0.164467
Endogenous	PTGER3	NM_000957.2	20	20	20	20	20	20	20	20	20	20	20	20	20	20	20	20	20	20	20	20	20	20	20	20	20	20	20	20	20	20	20	20	20	20	20
Endogenous	PTGER4	NM_000958.2	0.364724	0.333204	0.345679	0.363366	0.350383	0.350933	0.52196	0.50032	0.523678	0.497303	0.534281	0.512799	0.831172	0.804073	0.81992	0.407748	0.386536	0.434697	0.503567	0.477767	0.439983	0.448723	0.408684	0.448358	0.818102	0.813866	0.81634	0.409064	0.409829	0.516686	0.473051	0.417619	0.420026	0.423464	0.44536
Endogenous	PTGFR	NM_000959.3	20	20	20	20	20	20	20	20	20	20	20	20	20	20	20	20	20	20	20	20	20	20	20	20	20	20	20	20	20	20	20	20	20	20	20
Endogenous	PTGIR	NM_000960.3	7.08422	7.19485	7.19583	7.12366	7.09798	7.28147	15.9666	15.8995	15.8653	15.8123	16.2692	15.7727	13.9317	14.676	14.133	6.67712	6.53708	6.67211	3.63929	3.60198	3.95307	0.764456	0.554922	0.637024	14.2924	14.0783	14.4544	6.63462	6.65487	3.56612	3.966	3.73193	0.745557	0.603393	0.748113
Endogenous	PTGS1	NM_000962.2	3.47505	3.5702	3.27813	3.52292	3.58317	3.38089	0.409471	0.424894	0.450727	0.433083	0.441095	0.416865	2.28745	2.46897	2.34488	0.587249	0.6362	0.579345	0.221861	0.243027	0.254885	0.533932	0.508984	0.510398	2.37714	2.36483	2.40496	0.60016	0.593739	0.187661	0.229052	0.206097	0.580904	0.495147	0.54853
Endogenous	PTGS2	NM_000963.1	4.13548	4.91609	4.281	4.36044	4.45658	4.74799	1.42725	1.42185	1.4319	1.3763	1.38046	1.46065	0.768188	0.774286	0.773995	5.94401	6.05707	5.61988	9.58558	9.59219	9.50729	1.04722	1.06759	1.02689	0.771938	0.787519	0.768097	5.89942	5.9072	9.69805	9.50193	9.77732	1.05244	1.07288	1.03525
Endogenous	PTK2	NM_005607.3	0.331744	0.342138	0.336787	0.311388	0.348954	0.277564	0.501801	0.516516	0.543253	0.549965	0.470486	0.536219	0.223622	0.19984	0.217037	0.32099	0.429135	0.279665	0.206823	0.235125	0.231883	0.374913	0.479186	0.473026	0.215984	0.20618	0.212826	0.334718	0.325458	0.180226	0.20012	0.214928	0.394955	0.42603	0.403857
Endogenous	RAC1	NM_198829.1	1.87464	1.82008	2.00811	1.80931	1.83044	1.829	1.5408	1.54176	1.49886	1.55236	1.518	1.52829	4.11732	4.15396	4.20614	1.24639	1.23335	1.22092	1.33814	1.30688	1.24275	2.00159	2.0374	1.92995	4.22353	4.07378	4.1958	1.23075	1.23606	1.4137	1.28234	1.34351	2.06629	2.03158	1.9871
Endogenous	RAF1	NM_002880.2	0.839892	0.857928	0.848312	0.8405	0.848691	0.844894	2.49536	2.46143	2.49638	2.44887	2.42768	2.52413	0.655474	0.702427	0.663428	1.02227	1.04011	1.00613	0.968386	1.02726	1.0847	1.30125	1.32157	1.29802	0.6726	0.668109	0.684828	1.02271	1.02164	0.959717	1.00309	1.20027	1.36498	1.28954	1.32244
Endogenous	RAPGEF2	NM_014247.2	0.662113	0.636874	0.676721	0.649764	0.64695	0.648276	0.389918	0.376573	0.404681	0.389032	0.396675	0.388748	1.85417	1.84217	1.88881	0.280485	0.274435	0.282444	0.301798	0.300938	0.305996	0.173608	0.168278	0.145728	1.89134	1.84147	1.86951	0.278777	0.279606	0.304051	0.30634	0.31031	0.202012	0.166083	0.17217
Endogenous	RELA	NM_021975.2	0.159806	0.156354	0.153132	0.17117	0.153846	0.188146	0.572646	0.574067	0.571783	0.562652	0.561632	0.580119	0.626798	0.59161	0.617003	0.232575	0.180347	0.265632	0.171354	0.164922	0.193914	0.382721	0.329281	0.32884	0.607852	0.629598	0.598723	0.225299	0.230569	0.17957	0.198914	0.204859	0.341814	0.370862	0.351383
Endogenous	RELB	NM_006509.2	0.122323	0.123109	0.135327	0.117712	0.121201	0.120968	1.0978	1.03309	1.02579	1.00424	1.04061	1.07933	0.574739	0.519036	0.565092	0.840121	0.850276	0.797921	1.54015	1.57238	1.52287	1.88011	1.87811	1.97824	0.552865	0.557589	0.538204	0.827139	0.830441	1.52627	1.49092	1.54668	1.87167	1.84593	1.9221
Endogenous	RHOA	NM_001664.2	1.01557	1.02383	1.03461	1.01492	1.01495	1.03052	2.2594	2.21143	2.2218	2.19883	2.17915	2.27124	2.37504	2.38101	2.40544	0.85938	0.84856	0.855642	0.890751	0.882901	0.881105	1.82176	1.81025	1.80798	2.40437	2.38139	2.38871	0.854781	0.856733	0.903609	0.890143	0.895638	1.77445	1.84124	1.79716
Endogenous	RIPK1	NM_003804.3	0.276533	0.257451	0.270019	0.262594	0.273473	0.237141	0.177741	0.178014	0.169264	0.180712	0.174715	0.174334	0.221059	0.25341	0.229189	0.141004	0.160641	0.136541	0.196784	0.202516	0.209745	0.0623839	0.0539046	0.0599964	0.233973	0.230191	0.240546	0.14476	0.142624	0.180928	0.202734	0.182562	0.0618078	0.0549922	0.0631205
Endogenous	RIPK2	NM_003821.5	0.372872	0.35064	0.389023	0.368091	0.355146	0.381842	0.341288	0.334979	0.34641	0.334246	0.359851	0.333998	0.406106	0.340695	0.384156	1.0609	0.944165	1.1074	1.32155	1.3221	1.40076	1.27087	1.25851	1.22315	0.370417	0.387646	0.358634	1.03594	1.04983	1.30701	1.39176	1.37486	1.25536	1.28566	1.24445
Endogenous	ROCK2	NM_004850.3	2.10496	1.98775	2.04569	2.09254	2.0523	2.04428	1.88823	1.85761	1.90522	1.87727	1.90814	1.87685	1.49877	1.48273	1.50159	0.617418	0.600568	0.639709	0.291304	0.275036	0.277744	1.29153	1.38539	1.38641	1.49811	1.48986	1.49141	0.618703	0.619223	0.281828	0.298355	0.22957	1.1738	1.41847	1.25961
Endogenous	RPS6KA5	NM_004755.2	3.31588	3.03807	3.97865	3.08326	3.05732	3.31365	0.524229	0.497737	0.509133	0.508777	0.542906	0.49993	0.336806	0.298178	0.313209	9.17847	8.04909	9.10225	20	20	20	16.167	16.5585	16.3594	0.30324	0.323579	0.302299	8.73669	8.92813	20	20	20	15.9808	16.5853	16.0846
Endogenous	SHC1	NM_001130040.1	0.559513	0.610574	0.575098	0.564491	0.584818	0.575285	0.657372	0.660476	0.63909	0.652179	0.649687	0.65384	0.575535	0.607714	0.588658	0.515156	0.551347	0.486137	0.372277	0.402709	0.480547	0.247192	0.234832	0.253704	0.594918	0.585333	0.598879	0.517007	0.514598	0.343799	0.429707	0.474117	0.234694	0.239001	0.247542
Endogenous	SMAD7	NM_005904.2	0.457969	0.44543	0.45319	0.455323	0.452594	0.449215	1.43873	1.44813	1.43177	1.47134	1.44193	1.43132	1.31177	1.44736	1.33196	0.690625	0.686134	0.699465	0.539003	0.528869	0.482119	1.39718	1.49358	1.37925	1.3559	1.34752	1.39235	0.691667	0.691589	0.581284	0.496394	0.549619	1.50789	1.44128	1.41374
Endogenous	STAT1	NM_007315.2	1.83043	2.03832	1.82282	1.89154	1.93476	1.94263	1.14521	1.18875	1.12567	1.18326	1.14858	1.14382	1.35731	1.34661	1.34339	15.7681	16.6143	15.1361	7.56235	7.54665	7.53742	7.39166	7.54421	7.42096	1.33657	1.37345	1.33731	15.8635	15.7915	7.6987	7.54923	7.83081	7.52315	7.46223	7.42728
Endogenous	STAT2	NM_005419.2	1.5089	1.64825	1.59898	1.54323	1.54996	1.66467	1.28571	1.25682	1.28557	1.21716	1.29129	1.28438	1.26883	1.16883	1.25682	3.7273	3.6012	3.62562	4.98598	4.97368	4.79371	3.44101	3.49269	3.53839	1.22757	1.27363	1.19306	3.66225	3.68846	4.9967	4.82801	4.77411	3.39696	3.47904	3.45461
Endogenous	STAT3	NM_139276.2	2.38576	2.4256	2.34584	2.39652	2.42044	2.36447	2.5694	2.58398	2.62593	2.59237	2.58726	2.59124	2.132	2.2184	2.13864	1.27481	1.32111	1.26091	1.03462	1.04503	1.00826	1.84461	1.91229	1.9529	2.14876	2.17306	2.17252	1.28506	1.27956	1.02196	1.00081	0.994503	1.82319	1.88228	1.86909
Endogenous	TBXA2R	NM_001060.3	20	20	20	20	20	20	20	20	20	20	20	20	20	20	20	20	20	20	20	20	20	20	20	20	20	20	20	20	20	20	20	20	20	20	20
Endogenous	TCF4	NM_003199.1	1.4398	1.42785	1.39915	1.42091	1.45658	1.34904	1.12662	1.16806	1.16124	1.2104	1.13287	1.14254	0.502002	0.55929	0.508999	1.52994	1.66606	1.49604	0.792362	0.843246	0.902228	0.565307	0.567867	0.567101	0.520177	0.513494	0.53707	1.55836	1.54276	0.743423	0.832678	0.883589	0.582783	0.558036	0.573138
Endogenous	TGFB1	NM_000660.3	1.19636	1.33767	1.19872	1.21858	1.2755	1.22351	2.31001	2.28444	2.38397	2.28082	2.23202	2.38192	1.11226	1.00409	1.07819	0.881407	0.983196	0.822634	0.719704	0.730396	0.730842	0.491564	0.459715	0.498278	1.05602	1.09297	1.03424	0.893622	0.88481	0.715363	0.717941	0.741692	0.484277	0.460952	0.499207
Endogenous	TGFB2	NM_003238.2	2.45749	2.00587	1.53477	2.65727	2.41504	2.03112	0.539483	0.586062	0.587852	0.611006	0.584943	0.547795	0.287641	0.299298	0.276194	5.84341	6.25939	7.27299	20	20	20	20	20	20	0.286626	0.27581	0.300461	6.43587	6.23002	20	20	20	20	20	20
Endogenous	TGFB3	NM_003239.2	20	20	20	20	20	20	20	20	20	20	20	20	20	20	20	20	20	20	20	20	20	20	20	20	20	20	20	20	20	20	20	20	20	20	20
Endogenous	TGFBR1	NM_004612.2	0.680739	0.609548	0.669078	0.66314	0.64517	0.640413	0.39131	0.392708	0.407425	0.402818	0.38994	0.398574	1.17398	1.2202	1.20041	0.115979	0.110194	0.121992	0.123647	0.123424	0.117522	0.250369	0.246476	0.234875	1.2113	1.17682	1.21463	0.115734	0.116119	0.123213	0.118474	0.115466	0.264484	0.245357	0.249811
Endogenous	TLR1	NM_003263.3	2.07166	1.87634	2.0371	2.02522	1.97437	1.96328	1.12566	1.12986	1.15061	1.16346	1.12139	1.1351	0.750804	0.742899	0.743428	1.28824	1.22892	1.34951	0.890647	0.874667	0.85618	1.33717	1.3372	1.3126	0.742502	0.740872	0.744923	1.28584	1.28975	0.929673	0.875217	0.912453	1.2863	1.37498	1.30329
Endogenous	TLR2	NM_003264.3	0.732463	0.69293	0.732374	0.740143	0.701659	0.767513	1.22293	1.20639	1.23431	1.21333	1.23459	1.21818	0.811527	0.865172	0.812507	0.822865	0.717813	0.882009	0.559938	0.535543	0.526662	1.36881	1.32891	1.26704	0.81886	0.833267	0.835786	0.806723	0.817448	0.606416	0.554562	0.581844	1.33954	1.38508	1.31682
Endogenous	TLR3	NM_003265.2	20	20	20	20	20	20	20	20	20	20	20	20	20	20	20	20	20	20	20	20	20	13.313	13.9364	13.6177	20	20	20	20	20	20	20	20	13.0212	13.9796	13.1834
Endogenous	TLR4	NM_138554.2	2.5671	2.63612	2.4463	2.60315	2.63651	2.52571	1.94835	2.01759	1.99875	2.06588	1.94411	1.98242	0.431883	0.467092	0.431439	0.671275	0.714454	0.664369	1.05834	1.1259	1.21358	1.4912	1.40188	1.48561	0.438828	0.43977	0.451833	0.682964	0.677204	1.00582	1.11866	1.22553	1.51209	1.3935	1.5194
Endogenous	TLR5	NM_003268.3	0.515714	0.473128	0.569423	0.483714	0.487396	0.48553	0.134152	0.127264	0.130578	0.123533	0.130561	0.13326	0.120744	0.130274	0.130446	0.909972	0.878494	0.898318	11.381	11.387	11.3096	1.52537	1.36691	1.4227	0.133169	0.121383	0.131453	0.891809	0.898827	11.4832	11.3048	11.5551	1.71468	1.31924	1.59427
Endogenous	TLR6	NM_006068.2	0.345325	0.330513	0.361551	0.332347	0.337131	0.327861	0.441024	0.429642	0.401136	0.422814	0.445484	0.416887	0.15103	0.162085	0.153574	0.566828	0.574093	0.55684	1.34646	1.3532	1.35428	0.502575	0.539871	0.527848	0.157946	0.145843	0.161958	0.564163	0.564553	1.3369	1.34647	1.34486	0.496937	0.532938	0.503244
Endogenous	TLR7	NM_016562.3	31.0823	33.786	32.0759	32.2433	31.8635	34.8374	4.46268	4.48306	4.50905	4.36584	5.02251	4.26318	17.1478	15.541	16.5207	24.233	22.8226	24.1397	20	20	20	20	20	20	16.0869	17.1425	15.7844	23.8263	24.025	20	20	20	20	20	20
Endogenous	TLR8	NM_016610.2	0.460765	0.511589	0.51624	0.45411	0.479146	0.48058	0.470182	0.457847	0.469251	0.441436	0.495879	0.458294	0.50991	0.476515	0.507891	0.518027	0.549698	0.470578	1.24532	1.32688	1.18815	1.2944	1.50206	1.35919	0.497136	0.515048	0.483964	0.511365	0.511728	1.22151	1.11442	1.26932	1.50238	1.36143	1.3654
Endogenous	TLR9	NM_017442.2	20	20	20	20	20	20	20	20	20	20	20	20	20	20	20	20	20	20	20	20	20	20	20	20	20	20	20	20	20	20	20	20	20	20	20
Endogenous	TNF	NM_000594.2	0.275176	0.255903	0.252812	0.273727	0.270643	0.254025	0.660295	0.647948	0.734239	0.672363	0.791975	0.631607	0.62629	0.454599	0.544525	0.272845	0.28159	0.283387	0.0969881	0.100775	0.100893	0.102244	0.103138	0.100592	0.513508	0.568443	0.49579	0.278726	0.276484	0.0947426	0.0963838	0.102923	0.108604	0.100503	0.103973
Endogenous	TNFAIP3	NM_006290.2	4.47896	4.20812	4.05839	4.5827	4.38773	4.41226	5.21165	5.40494	5.52868	5.57822	5.40455	5.28929	5.47318	5.30798	5.22133	10.7979	10.3117	11.6466	6.32353	6.16843	6.02693	5.20786	5.44831	5.3925	5.1862	5.44193	5.26319	10.9208	10.9108	6.5032	6.21925	6.11738	5.00099	5.49298	5.14592
Endogenous	TNFSF14	NM_003807.2	8.06626	8.21977	7.64812	8.05659	8.32561	7.57218	0.638559	0.678404	0.619317	0.686106	0.591461	0.65958	0.216972	0.254116	0.225586	7.06762	7.96753	6.8487	20	20	20	8.50423	8.61257	8.97712	0.233547	0.224471	0.242237	7.26317	7.15826	20	20	20	7.841	8.80755	8.39293
Endogenous	TOLLIP	NM_019009.2	2.10964	2.00263	1.94803	2.13008	2.08276	2.03207	1.66527	1.69186	1.70574	1.71352	1.68897	1.67625	1.23999	1.19754	1.21216	1.48333	1.47836	1.55448	1.66355	1.75709	1.87814	1.89528	1.67574	1.79683	1.2098	1.2147	1.21248	1.50496	1.49873	1.59458	1.74732	1.90649	1.8557	1.72994	1.88489
Endogenous	TRADD	NM_003789.2	0.671734	0.667631	0.638799	0.681658	0.675155	0.667341	5.97856	5.701	6.02304	5.63594	5.52862	6.18143	3.48346	3.64458	3.60296	1.14133	1.1499	1.16485	1.76368	1.76184	1.76599	0.208269	0.220543	0.201788	3.67093	3.46333	3.67457	1.15272	1.14886	1.80888	1.76496	1.872	0.216006	0.21896	0.205749
Endogenous	TRAF2	NM_021138.3	0.494129	0.499094	0.461171	0.509185	0.501024	0.501246	0.955097	0.987806	0.92772	0.990843	0.958213	0.945845	1.39874	1.39632	1.36122	0.725337	0.725695	0.746497	0.246882	0.241832	0.25871	0.217251	0.224363	0.232727	1.36564	1.3848	1.38791	0.733813	0.731269	0.246594	0.263337	0.249679	0.197401	0.22993	0.213535
Endogenous	TREM2	NM_018965.3	2.04777	2.25767	2.0841	2.05631	2.16814	2.04986	4.10124	4.08045	4.00055	3.98274	4.06082	4.08281	1.57494	1.68219	1.59989	0.178228	0.200961	0.164856	0.120875	0.119797	0.111864	0.0966429	0.0957056	0.0941191	1.60788	1.64198	1.62513	0.180585	0.178733	0.122269	0.113913	0.112036	0.109496	0.0904595	0.101046
Endogenous	TSLP	NM_033035.4	20	20	20	20	20	20	20	20	20	20	20	20	20	20	20	20	20	20	20	20	20	20	20	20	20	20	20	20	20	20	20	20	20	20	20
Endogenous	TWIST2	NM_057179.2	20	20	20	20	20	20	20	20	20	20	20	20	20	20	20	20	20	20	20	20	20	11.3069	11.0727	10.7561	20	20	20	20	20	20	20	20	12.0748	10.8998	11.4237
Endogenous	TYROBP	NM_003332.3	54.6897	53.4806	56.5438	53.4036	53.9668	53.1376	34.6428	34.497	34.4458	34.5108	34.8758	34.3953	50.9092	49.2703	50.7002	26.4211	26.6499	26.0428	23.7295	23.8078	24.127	34.0171	34.1445	34.3482	50.2827	50.4883	49.798	26.3217	26.3386	23.3982	24.0141	23.5236	33.885	34.0875	34.0837
Housekeeping	CLTC	NM_004859.2	647.94	662.08	659.86	648.19	613.36	686.01	654.94	669.09	685.71	681.8	664.69	650.16	838.37	764.22	838.33	973.46	880.77	937.24	900.82	972.18	787.55	896.16	967.23	841.9	720.66	736.81	766.46	864.04	868.2	768.95	777.94	896.52	910.62	868.97	872.74
Housekeeping	GAPDH	NM_002046.3	4944.14	5205.05	5225.79	4811.79	5321.49	5508.43	4659.34	4432.04	4460.71	4994.35	4925.16	4807.79	4960.72	4738.66	4688.59	6869.99	6061.61	6105.75	4988.02	5231.24	5147.49	4563.88	4999.6	4279.57	4794.27	4716.29	4702.91	6667.23	6116.39	4323.32	4667.65	4911	4414.54	4141.07	4175.94
Housekeeping	GUSB	NM_000181.1	260.29	242.87	230.82	237.56	240.01	238.32	206.49	205.2	188.68	202.58	214.01	224.85	191.03	208.85	187.3	223.08	320.85	232.6	163.79	218.84	194.86	182.49	166.12	186.39	186.74	202.98	174.58	214.48	208.02	258.11	227.69	211.99	181.59	181.15	190.02
Housekeeping	HPRT1	NM_000194.1	252.39	243.78	271.83	262.03	275.57	248.17	245.76	272.88	287.96	280.18	262.69	247.87	237.61	253.44	234.13	299.14	264.23	263.39	297.79	281.97	316.64	286.77	275.97	334.01	250.36	227.54	267.23	297.21	288.92	301.13	316.24	291.48	275.74	287.77	276.5
Housekeeping	PGK1	NM_000291.2	2126.02	2205.87	2193.06	2315.14	2185.16	2135.02	2476.62	2389.84	2604.11	2465.18	2393.13	2395.43	2503.65	2462.41	2421.33	2362.67	2154.75	2216.54	2471.68	2541.97	2427.6	2453.84	2606.97	2491.94	2629.52	2635.17	2592.65	2334.76	2333.01	2548.82	2390.75	2570.32	2616.18	2506.91	2381.54
Housekeeping	TUBB	NM_178014.2	687.91	719.95	685.63	666.43	702.26	718.65	756.29	695.29	641.66	652.58	696.16	717.21	653.42	624.99	699.36	405.61	386.91	489.14	573.25	408.23	527.74	540.95	538.54	476.62	702.68	694.19	671.52	484.11	511.38	408.67	464.87	437.22	521.89	548.18	570.07

## Sheet: Data in supplement
Cell viability
	RPMI 1640				250 ng/mL LPS
BBS	94.9195	100.333	100.896	103.852	108.625	102.534	102.758	100.359
10	99.7333	135.155	106.831	53.6794	91.9184	100.886	82.2165	55.2841
30	135.204	141.81	66.1318	79.9952	111.78	107.496	91.6777	86.9694
100	131.72	140.958	89.5642	75.0639	92.7309	103.998	91.7877	91.9246
300	143.303	92.8624	34.6323	48.0947	105.504	96.5867	90.6933	49.9957
NanoString houseekping genes
CTLC
	RPMI 1640						250 ng/mL LPS
BBS	647.94	662.08	659.86	648.19	613.36	686.01	973.46	880.77	937.24	864.04	868.2
30	654.94	669.09	685.71	681.8	664.69	650.16	900.82	972.18	787.55	768.95	777.94	896.52
300	838.37	764.22	838.33	720.66	736.81	766.46	896.16	967.23	841.9	910.62	868.97	872.74
GAPDH
	RPMI 1640						250 ng/mL LPS
BBS	4944.14	5205.05	5225.79	4811.79	5321.49	5508.43	6869.99	6061.61	6105.75	6667.23	6116.39
30	4659.34	4432.04	4460.71	4994.35	4925.16	4807.79	4988.02	5231.24	5147.49	4323.32	4667.65	4911
300	4960.72	4738.66	4688.59	4794.27	4716.29	4702.91	4563.88	4999.6	4279.57	4414.54	4141.07	4175.94
GUSB
	RPMI 1640						250 ng/mL LPS
BBS	260.29	242.87	230.82	237.56	240.01	238.32	223.08	320.85	232.6	214.48	208.02
30	206.49	205.2	188.68	202.58	214.01	224.85	163.79	218.84	194.86	258.11	227.69	211.99
300	191.03	208.85	187.3	186.74	202.98	174.58	182.49	166.12	186.39	181.59	181.15	190.02
HPRT1
	RPMI 1640						250 ng/mL LPS
BBS	252.39	243.78	271.83	262.03	275.57	248.17	299.14	264.23	263.39	297.21	288.92
30	245.76	272.88	287.96	280.18	262.69	247.87	297.79	281.97	316.64	301.13	316.24	291.48
300	237.61	253.44	234.13	250.36	227.54	267.23	286.77	275.97	334.01	275.74	287.77	276.5
PGK1
	RPMI 1640						250 ng/mL LPS
BBS	2126.02	2205.87	2193.06	2315.14	2185.16	2135.02	2362.67	2154.75	2216.54	2334.76	2333.01
30	2476.62	2389.84	2604.11	2465.18	2393.13	2395.43	2471.68	2541.97	2427.6	2548.82	2390.75	2570.32
300	2503.65	2462.41	2421.33	2629.52	2635.17	2592.65	2453.84	2606.97	2491.94	2616.18	2506.91	2381.54
TUBB
	RPMI 1640						250 ng/mL LPS
BBS	687.91	719.95	685.63	666.43	702.26	718.65	405.61	386.91	489.14	484.11	511.38
30	756.29	695.29	641.66	652.58	696.16	717.21	573.25	408.23	527.74	408.67	464.87	437.22
300	653.42	624.99	699.36	702.68	694.19	671.52	540.95	538.54	476.62	521.89	548.18	570.07
Actb Cq values
	RPMI 1640								0.5 ng/mL								2.5 ng/mL								250 ng/mL LPS
BBS	18.2913	20.233	22.9792	21.7297	17.0579	20.8924	19.39	18.4362	16.6982	20.4698	16.2375	16.4906	16.3392	16.47	16.1478	16.3031	18.0815	18.2419	17.1887	16.986	20.4446	16.5748	16.7243	17.438	23.2283	17.7003	17.5572	17.6364	24.2955	23.2657	18.749	21.1952
10	22.4944	23.5191	21.4448	17.1406	18.9932	18.4603	29.9996	20.9572	16.5138	16.7326	16.3596	16.5065	16.1664	16.1937	16.1088	16.5999	17.1321	17.5712	18.2001	16.8605	16.7657	16.7791	17.0739	17.0819	17.5903	18.3403	17.7741	17.7197	17.8712	19.8334	17.7258	19.0571
30	24.1158	21.2036	21.3909	18.4826	21.3993	21.1868	15.9452	17.7936	16.4817	16.508	16.2563	16.2919	16.314	16.1984	16.0416	16.2405	16.8597	17.2403	16.8435	16.6777	17.2418	19.178	18.1834	18.0344	17.4099	17.8246	17.6789	17.7632	17.7831	19.5316	18.9356	20.2983
100	21.8287	17.5672	18.8244	17.8024	19.5317	15.7414	15.7648	17.5686	16.9026	16.0344	15.8705	15.6508	15.7483	15.5559	15.605	16.0917	16.4643	16.5543	16.2914	16.1775	16.9442	18.2012	16.6105	16.7337	17.1377	17.0983	17.0605	17.201	17.0977	17.5615	17.3629	16.7667
300	21.5626	15.7401	19.5479	22.587	20.443	20.5396	22.3183	15.3549	16.0911	16.004	15.7616	15.4259	15.4516	15.3559	15.6943	15.7174	16.1094	16.1872	15.9363	15.9262	15.9148	16.4853	16.8738	19.2215	16.5419	16.6586	16.4706	16.5943	17.728	18.9488	22.0704	17.1823
IL10
	RPMI 1640								0.5								2.5								250
BBS	0.19427	0.334228	0.184914	0.381439	0.430832	0.545216	0.479286	0.580273	0.52399	0.602716	0.706085	0.677083	0.580426	0.603867	0.591763	0.610232	0.510237	0.665612	0.613902	0.657879	0.711641	0.683889	0.754701	0.774914	0.0824629	0.17067	0.379291	0.375082	0.995958	0.408161	0.734986	0.71139
10	0.320272	0.658777	0.538293	0.535259	0.773387	0.726423		0.750624	0.595186	0.642954	0.771165	0.743923	0.600826	0.631774	0.725996	0.766416	0.54937	0.574977	0.785337	0.730022	0.737882	0.769582	0.776223	0.807345	0.150495	0.345023	0.403234	0.397251	0.695631	0.721168	0.791033	0.809976
30	0.49579	0.525421	0.642876	0.578658	0.658907	0.723407	0.504694	0.753967	0.553891	0.474457	0.740491	0.629826	0.589702	0.566255	0.63635	0.595364	0.464162	0.488004	0.68605	0.542456	0.795404	0.865306	0.86877	0.82069	0.21809	0.242825	0.413104	0.459874	0.721713	0.820918	0.74851	0.800483
100	0.643216	0.507889	0.730278	0.619365	0.935782	0.438324	0.41262	0.516271	0.46308	0.26441	0.517379	0.272105	0.407459	0.435082	0.404989	0.358404	0.312432	0.360732	0.398102	0.380198	0.474029	0.765867	0.465817	0.579762	0.28258	0.171863	0.291374	0.344911	0.545409	0.652782	0.615764	0.619344
300	0.74143	0.491933	0.575456	0.629021	0.64877	0.583218	0.544494	0.249304	0.285413	0.268025	0.34728	0.171938	0.288911	0.285094	0.278094	0.277311	0.240306	0.262268	0.263488	0.316156	0.403038	0.333986	0.428957	0.593541	0.193377	0.168814	0.257906	0.16516	0.453457	0.538693	0.193197	0.504901
IL12A
	RPMI 1640								0.5								2.5								250
BBS					0.641773		1.21119		0.998936		0.514006	0.294272	0.494511	0.527179	0.332555	0.529515	0.71243	1.01686	0.907102	0.700663		0.578638	1.03182	0.751649		1.19073	1.16798	1.58294			1.09883
10				0.401057					0.534676	0.583246	0.763741	0.947197	0.816076	0.663045	0.505066	0.847956	0.133359	0.853912		1.03884	0.304708	0.31208	0.909353	0.308762	1.10755	1.55711	1.32341	1.03927	1.12569	1.47878	1.12952	1.49686
30				0.964463		1.61182	0.0699289	1.09602	0.663579	0.713015	0.868634	0.633419	0.674141	0.558149	0.786229	0.361062	0.763094	1.30021	1.31038	1.10546	0.0499436	1.16014	0.593719	0.801386	1.0611	0.912218	1.42789	1.17777	1.15988	1.49677	1.15423
100		0.645036		1.06381		0.50299	0.453199		0.924969	0.735389	1.09996	0.7806	0.722992	0.514414	0.715594	0.81075	0.732402	0.651821	1.12969	0.802438	0.388505	0.997571	0.670835	0.374735	1.21114	1.13612	1.30067	0.670914	0.912069	0.534472	1.01633	0.917546
300		0.646381						0.0349743	0.601421	0.709339	0.920865	1.01663	0.408241	0.475533	0.302105	0.557893	0.501689	0.566178	0.727781	0.908121	0.0304708	0.475367	0		1.11236	0.94862	1.11972	1.03423	1.2395	0.87102		0.82936
IL12B
	RPMI 1640								0.5								2.5								250
BBS	0				0.306939			0.257057	1.10138	1.27311	0.967945	0.500995	0.795978	0.714316	0.73749	0.54396	1.57842	1.27113		1.64296	1.87481	1.73137	1.71627	1.71997	3.41508	3.49241	3.66738	3.74665	3.19786	3.32217	3.51538	3.53409
10				0.855143	0.370855	0.328212			0.785034	1.10939	1.04204	0.912125	0.781341	0.619879	0.634778	0.464924	1.23295	1.1025	1.99551	1.67407	0.972868	1.37909	1.33902	1.73301	3.35278	3.41412	3.61481	3.54472	3.32529	3.42729	3.43766	3.40638
30			1.71531	1.05583	1.50968		0.716737	1.06728	0.744402	0.748584	1.2109	1.27829	0.68337	0.940904	0.850041	1.44891	1.10294	0.924736	1.48737	1.29292	1.37471	1.59977	1.62715	1.34077	3.28081	3.20947	3.5075	3.62307	3.29221	3.24917	3.23102	3.39828
100	1.6221	1.39289	1.36845	1.63828	1.25815	1.20856	1.02928	1.30267	1.68756	0.940585	1.29894	1.57306	1.00211	1.12746	1.12373	1.47751	1.48159	1.14459		1.47991	1.36995	1.31347	1.32771	1.28644	2.94013	3.12802	3.21576	3.2498	3.13104	3.10987	3.04652	3.11818
300		1.82948	1.84452		0.457226	1.68639		1.42939	1.45709	1.22986	1.72848	1.36751	1.47447	1.47661	1.5354	1.67136	1.45954	1.39887	1.64769	1.60246	1.54302	0.85124	1.22577	1.48064	2.79253	2.79583	3.02363	3.20741	2.84416	2.8962	2.2682	2.94947
IL23A
	RPMI 1640								0.5								2.5								250
BBS	0.201726	0.348117	0.74333	0.623668	0	0.210854	0.233197	0.212708	0.729678	0.923226	0.675537	0.7978	0.683625	0.69155	0.65973	0.726297	0.884352	0.856977	0.968828	0.929884	1.12926	1.16059	1.24406	1.32288	1.87642	1.73038	1.88685	1.94616	2.16444	1.83997	2.00027	2.10705
10	0.834601	0.961495	0.707855	0.576911	0.585885	0.432011	0.845881	0.670091	0.711667	0.636373	0.830292	0.768259	0.54644	0.580368	0.631971	0.784847	0.849035	0.792765	1.08532	0.990809	1.11353	1.1345	1.18998	1.23838	1.66406	1.83004	1.91134	1.93987	1.80408	2.03368	1.96677	1.98307
30	1.19591	0.831137	0.792005	0.668558	0.82692	0.790643	0.504284	0.546643	0.663821	0.546979	0.849368	0.672331	0.595044	0.582996	0.599741	0.557757	0.673011	0.584591	0.868465	0.786832	1.115	1.03546	1.25842	1.1556	1.69571	1.63451	1.85852	1.75664	1.84242	1.77561	1.79654	1.8514
100	1.16411	0.859479	1.01588	0.903915	0.957509	0.760465	0.749667	0.768622	0.928049	0.703717	0.808574	0.793215	0.705733	0.720143	0.687456	0.76542	0.792298	0.761554	0.831087	0.768952	1.07219	1.23245	0.96729	1.10398	1.5804	1.49329	1.54238	1.60063	1.73168	1.78241	1.60099	1.68073
300	1.31463	0.98853	1.14841	1.21273	1.20915	1.11027	1.28109	0.782311	0.89029	0.848848	0.826055	0.747998	0.75353	0.806374	0.715275	0.813029	0.856613	0.840907	0.88141	0.895089	1.11619	0.990924	1.08908	1.22374	1.45444	1.40883	1.50435	1.47294	1.64518	1.78281	1.32834	1.61406
TGFB1
	RPMI 1640								0.5								2.5								250
BBS	1.48601	1.47818	1.57498	1.92325	1.38024	1.68674	1.64571	1.63154	1.4178	1.5362	1.32385	1.33379	1.6143	1.545	1.56014	1.43693	1.52748	1.64534	1.34655	1.27076		1.39936	0.64745	1.3795	1.69516	1.65496	1.51029	1.47055	1.99127	1.51087	1.53982	1.64095
10	1.63992	1.54834	1.81466	1.64053	1.73603	1.61898		1.66784	1.54774	1.53846	1.38821	1.31002	1.58398	1.60459	1.54089	1.50914	1.45625	1.59962	1.47347	1.33075	0.38118	1.5811	1.41914	1.29252	1.68169	1.72783	1.53736	1.50327	1.52975	1.75975	1.59127	1.63282
30	2.03606	2.00368	1.87837	1.73215	1.98577	1.99588	1.39422	1.68913	1.57813	1.4936	1.3987	1.3447	1.63699	1.59989	1.59131	1.44607	1.48961	1.50561	1.45908	1.2905	0	1.02082	0.304415		1.7334	1.69231	1.54503	1.61076	1.61267	1.80659	1.73603	1.84972
100	1.89763	1.72256	1.59708	1.47502	1.77413	1.46155	1.40981	1.46886	1.5822	1.53867	1.40234	1.2691	1.60458	1.63445	1.63876	1.58069	1.48393	1.58561	1.43461	1.34125	1.70327	1.79694	1.68728	1.67918	1.74142	1.69531	1.47411	1.57265	1.69231	1.6883	1.51065	1.63021
300	1.97969	1.52977	1.83053	2.02549	1.99539	1.90939	1.94837	1.41098	1.66483	1.64193	1.47275	1.37658	1.78506	1.67465	1.64447	1.61112	1.63594	1.64512	1.4585	1.48705	1.65706	1.57623	1.66473	1.85448	1.74527	1.73902	1.57465	1.5483	1.73106	1.85756	1.86229	1.77465
TGFB1:IL12A
	RPMI 1640								0.5								2.5								250
BBS					2.51359		2.20965		2.19399		2.58497	2.81465	2.89492	2.79295	3.00271	2.68254	2.59017	2.4036	2.21458	2.34523		2.59585	1.39076	2.40298		2.23936	2.11743	1.66274			2.21612
10				3.01459					2.78818	2.73034	2.3996	2.13795	2.54303	2.71667	2.81095	2.43631	3.09802	2.52084		2.06703	1.8516	3.04415	2.28491	2.75888	2.34928	1.94584	1.98907	2.23913	2.17919	2.0561	2.23688	1.91108
30				2.54281		2.15918	3.09941	2.36824	2.68968	2.55572	2.30519	2.48641	2.73798	2.81687	2.58021	2.86013	2.50164	1.98053	1.92382	1.96016	1.72518	1.6358	1.48582		2.44743	2.55522	1.89227	2.20811	2.22791	2.08495	2.35693
100		2.85265		2.18633		2.73368	2.73174		2.43236	2.5784	2.07751	2.26363	2.65672	2.89516	2.69829	2.54507	2.52666	2.70892	2.08005	2.31393	3.0899	2.57449	2.79157	3.07957	2.30541	2.33432	1.94857	2.67686	2.55536	2.92895	2.26945	2.48779
300		2.65851						3.15113	2.83854	2.70772	2.32701	2.13508	3.15194	2.97424	3.11749	2.82836	2.90938	2.85407	2.50584	2.35405	3.40171	2.87599	3.43986		2.40804	2.56553	2.23006	2.2892	2.26668	2.76166		2.72042
TGFB1:IL12B
	RPMI 1640								0.5								2.5								250
BBS	3.04256				2.62986			2.93104	1.87298	1.81964	1.91246	2.38936	2.37488	2.38724	2.37921	2.44953	1.50561	1.93077		1.18436		1.22456	0.487736	1.21609	-0.163364	-0.280885	-0.600529	-0.719545	0.349962	-0.25474	-0.418996	-0.336581
10				2.34194	2.92173	2.84732			2.31926	1.98563	1.90273	1.95446	2.35919	2.54127	2.46267	2.60078	1.77987	2.05368	1.03451	1.21323	0.964871	1.75857	1.63667	1.11607	-0.114524	-0.12974	-0.52089	-0.484884	-0.238981	-0.110985	-0.289829	-0.217006
30			1.71962	2.23288	2.03265		2.23404	2.17842	2.39029	2.30158	1.74436	1.62297	2.51018	2.21555	2.29783	1.55372	1.94323	2.13744	1.52826	1.55414	0.181845	0.977602	0.233828		0.00914916	0.0394063	-0.405907	-0.455758	-0.122977	0.11398	0.0615739	0.00800035
100	1.83209	1.88622	1.78519	1.39329	2.07253	1.80955	1.9371	1.72275	1.4512	2.15464	1.65996	1.2526	2.15903	2.06354	2.0716	1.65974	1.5589	1.99759		1.4179	1.88989	2.04003	1.91613	1.9493	0.357847	0.123854	-0.185087	-0.120593	0.117828	0.134983	0.0206962	0.0685861
300		1.25685	1.54258			1.77955		1.53815	1.7643	1.96863	1.30083	1.56563	1.86715	1.7546	1.66563	1.49632	1.73296	1.80282	1.36736	1.44115	1.6706	2.28155	1.99552	1.9304	0.509306	0.499753	0.107582	-0.102551	0.443456	0.517914	1.15065	0.381746
TGFB1:IL23A
	RPMI 1640								0.5								2.5								250
BBS	-0.671346	-0.825562	-1.12398	-0.656047	-0.575387	-0.479736	-0.543108	-0.536791	-1.2675	-1.34265	-1.30732	-1.41963	-1.02495	-1.10217	-1.05522	-1.24499	-1.3125	-1.16726	-1.5779	-1.61475		-1.71685	-2.55223	-1.899	-2.13688	-2.03104	-2.33218	-2.43124	-2.1288	-2.28472	-2.41607	-2.42172
10	-1.15031	-1.36878	-0.848824	-0.892012	-0.805482	-0.768658		-0.957879	-1.11956	-1.05354	-1.3977	-1.41386	-0.91809	-0.931407	-1.04671	-1.23133	-1.34841	-1.14877	-1.56747	-1.61569	-2.68798	-1.50902	-1.72647	-1.90149	-1.93799	-2.05784	-2.32961	-2.39222	-2.22995	-2.22955	-2.33112	-2.30588
30	-1.11548	-0.783081	-0.869257	-0.892033	-0.796776	-0.750386	-1.06569	-0.813135	-1.04131	-1.009	-1.4063	-1.28325	-0.913676	-0.938728	-0.964054	-1.06732	-1.13903	-1.0346	-1.36501	-1.45196	-3.07063	-1.97026	-2.90963		-1.91794	-1.89782	-2.26911	-2.10151	-2.18538	-1.92465	-2.01614	-1.9573
100	-1.2221	-1.09255	-1.37443	-1.38452	-1.13901	-1.25454	-1.29548	-1.25538	-1.30147	-1.12068	-1.36185	-1.47974	-1.05678	-1.04132	-1.00432	-1.14035	-1.26399	-1.13157	-1.3521	-1.38333	-1.32454	-1.39114	-1.23563	-1.38043	-1.7946	-1.7536	-2.0239	-1.98361	-1.995	-2.04974	-2.04597	-2.00614
300	-1.29056	-1.41439	-1.2735	-1.14286	-1.16939	-1.15651	-1.28834	-1.32696	-1.18108	-1.16254	-1.30893	-1.32704	-0.924098	-1.08735	-1.02643	-1.15753	-1.1763	-1.15141	-1.37854	-1.36367	-1.41476	-1.37032	-1.37997	-1.32489	-1.6648	-1.62544	-1.88532	-1.88027	-1.86974	-1.88088	-1.42167	-1.79503
