# Supplementary material for: Mycobacterium vaccae NCTC 11659, a Soil-Derived Bacterium with Stress Resilience Properties, Modulates the Proinflammatory Effects of LPS in Macrophages
Source: Int J Mol Sci. 2023 Mar 8;24(6):5176. doi: 10.3390/ijms24065176 (PMC10049321; doi:10.3390/ijms24065176)
Supplement: Supplementary file 1 [file ijms-24-05176-s001.zip › Ratio calculation example_101222_EH.xlsx]

## Sheet: Example IL10
Treatment group	IL10 Cq values	Housekeeping Cq values	Normalized (delta) value	Maximum delta value	Delta delta value	Fold change/relative expression value
Control	21	14	7	7.4	-0.4	1.31951
Control	21	14	7	7.4	-0.4	1.31951
Control	21.4	14	7.4	7.4	0	1
Control	20.8	14	6.8	7.4	-0.6	1.51572
Control	20.5	14	6.5	7.4	-0.9	1.86607
Drug	18	14	4	7.4	-3.4	10.5561
Drug	18.7	14	4.7	7.4	-2.7	6.49802
Drug	17.6	14	3.6	7.4	-3.8	13.9288
Drug	18	14	4	7.4	-3.4	10.5561
Drug	18.3	14	4.3	7.4	-3.1	8.57419

## Sheet: Example IL12B
Treatment group	IL12B Cq values	Housekeeping Cq values	Normalized (delta) value	Maximum delta value	Delta delta value	Fold change/relative expression value
Control	30	14	16	16.5	-0.5	1.41421
Control	29.8	14	15.8	16.5	-0.7	1.6245
Control	30.2	14	16.2	16.5	-0.3	1.23114
Control	30.5	14	16.5	16.5	0	1
Control	29.6	14	15.6	16.5	-0.9	1.86607
Drug	27	14	13	16.5	-3.5	11.3137
Drug	27	14	13	16.5	-3.5	11.3137
Drug	26.5	14	12.5	16.5	-4	16
Drug	27.7	14	13.7	16.5	-2.8	6.9644
Drug	27.8	14	13.8	16.5	-2.7	6.49802

## Sheet: Ratio examples
Method 1: Dividing relative expression values by each other
Treatment group	IL10 relative expression (previously calculated)	IL12B relative expression (previously calculated)	IL10/IL12B ratio
Control	1.31951	1.41421	0.933033
Control	1.31951	1.6245	0.812252
Control	1	1.23114	0.812252
Control	1.51572	1	1.51572
Control	1.86607	1.86607	1
Drug	10.5561	11.3137	0.933033
Drug	6.49802	11.3137	0.574349
Drug	13.9288	16	0.870551
Drug	10.5561	6.9644	1.51572
Drug	8.57419	6.49802	1.31951
Method 2: Calculating IL10 expression purely relative to IL12B expression
Treatment group	IL10 Cq values	IL12B Cq values	Delta value	IL10/IL12B ratio
Control	21	30	-9	512
Control	21	29.8	-8.8	445.722
Control	21.4	30.2	-8.8	445.722
Control	20.8	30.5	-9.7	831.746
Control	20.5	29.6	-9.1	548.748
Drug	18	27	-9	512
Drug	18.7	27	-8.3	315.173
Drug	17.6	26.5	-8.9	477.713
Drug	18	27.7	-9.7	831.746
Drug	18.3	27.8	-9.5	724.077
